# Supplementary material
Source: PubMed Central journal article supplement (PMC4653064)

# Experiment Section

## *Table of Contents*

|                                                                                                |     |
|------------------------------------------------------------------------------------------------|-----|
| General Considerations                                                                         | S1  |
| General procedure 1 (GP1): Preparation of <i>N</i> -cyclobutylanilines                         | S1  |
| General procedure 2 (GP2): Synthesis of bicyclic cyclobutylanilines                            | S4  |
| Catalyst optimization                                                                          | S7  |
| Temperature control study                                                                      | S9  |
| General procedure 3 (GP3): Visible light catalyzed [4+2] annulation                            | S9  |
| Diastereomer identification: key NOSEY signals                                                 | S19 |
| Crystal data of <b>5h</b> and <b>7d</b>                                                        | S19 |
| 1,4-Addition of 4-fluoro- <i>N</i> -cyclobutylaniline <b>1k</b> to methyl propiolate <b>2d</b> | S20 |
| Stern-Volmer quenching study                                                                   | S21 |
| Cyclic Voltammogram of 4-tert-butyl- <i>N</i> -cyclobutylaniline <b>1a</b>                     | S22 |
| Proposed catalytic cycle for the [4+2] annulation                                              | S22 |
| References                                                                                     | S23 |
| NMR data                                                                                       | S23 |

## General Considerations

All reactions were carried out under a nitrogen atmosphere unless otherwise stated. Dry solvents were used as received except THF, CH<sub>2</sub>Cl<sub>2</sub>, Et<sub>2</sub>O, and toluene. They were rigorously purged with argon for 2 h and then further purified by passing through two packed columns of neutral alumina (for THF and Et<sub>2</sub>O) or through neutral alumina and copper (II) oxide (for toluene and CH<sub>2</sub>Cl<sub>2</sub>) under argon from a solvent purification system. A standard workup protocol consisted of extraction with diethyl ether, washing with brine, drying over Na<sub>2</sub>SO<sub>4</sub>, and removal of the solvent in vacuum. Column chromatography was carried out with silica gel (230-400 mesh). All new compounds were characterized by <sup>1</sup>H NMR, <sup>13</sup>C NMR, IR spectroscopy, high-resolution mass spectroscopy (HRMS), and melting point if solid. Nuclear magnetic resonance (NMR) spectra were obtained on a Bruker Avance DPX-300 and Bruker Avance DPX-400. Chemical shifts (δ) were reported in parts per million (ppm) relative to residual proton signals in CDCl<sub>3</sub> (7.26 ppm, 77.23 ppm) or CD<sub>2</sub>Cl<sub>2</sub> (5.32 ppm, 54 ppm) at room temperature. IR spectra were recorded (thin film on NaCl plates) on a PerkinElmer Spectrum 100 series instrument. High resolution mass spectra were recorded on a Bruker Ultraflex II TOF/TOF mass spectrometer. Gas chromatography/mass spectroscopy (GC/MS) analyses were performed on an Agilent 6890N Network GC System/5973 inert Mass Selective Detector. Gas chromatography analyses were performed using a Shimadzu GC-2010 Plus instrument. Melting points (m.p.) were recorded using Stuart SMP10 Melting Point Apparatus and were uncorrected.

### General procedure 1 (GP1): Preparation of *N*-cyclobutylanilines

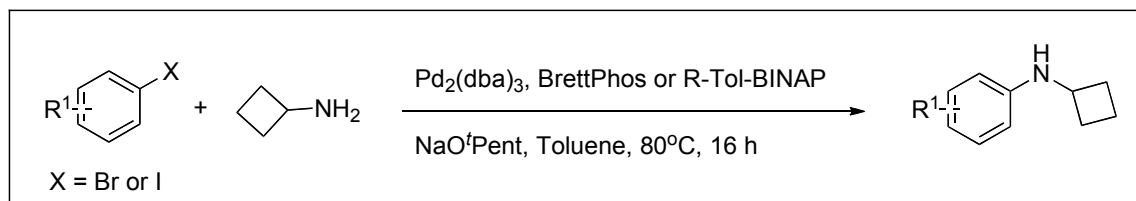

To an oven-dried schlenk tube equipped with a stir bar were added 0.02 mmol of Pd<sub>2</sub>(dba)<sub>3</sub> and 0.06 mmol of ligand ((*R*)-Tol-BINAP or BrettPhos). Glove box was used to add 3 mmol of NaO<sup>t</sup>Pent, followed by 2 mmol of aromatic halide, 2.2 mmol of cyclobutylamine, and 4 mL of toluene were then added to the reaction mixture and heated at 80°C for 16 h. After completion, the reaction mixture was cooled to room temperature, diluted with diethyl ether, filtered over a short pad of silica gel, and concentrated in vacuum. Purification by flash chromatography on silica gel afforded *N*-cyclobutylaniline.

**4-*tert*-Butyl-*N*-cyclobutylaniline (1a).** Following GP1 with 4-*tert*-butyl-bromobenzene (0.87 mL, 5 mmol) and BrettPhos (80.5 mg, 0.15 mmol, 3 mol%), the product was isolated after flash chromatography on silica gel (1: 30 EtOAc/hexanes) as yellow oil (1.01 g, 99%). IR  $\nu_{\text{max}}$  (cm<sup>-1</sup>) 3400, 3045, 2959, 2866, 1614, 1518, 1472, 1361, 1319, 1192, 820; <sup>1</sup>H NMR (400 MHz, Chloroform-*d*) δ 7.13 – 7.04 (m, 2H), 6.45 – 6.37 (m, 2H), 3.80 (tt, *J* = 8.1, 6.9 Hz, 1H), 3.61 (s, 1H), 2.36 – 2.23

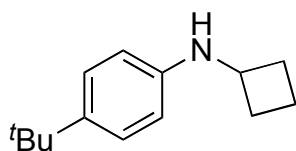

(m, 2H), 1.79 – 1.60 (m, 4H), 1.17 (d,  $J = 0.7$  Hz, 9H);  $^{13}\text{C}$  NMR (101 MHz,  $\text{CDCl}_3$ )  $\delta$  144.86, 140.04, 125.98, 112.67, 49.18, 33.83, 31.55, 31.37, 15.26; HRMS (ESI)  $m/z$   $[\text{M}+\text{H}]^+$ , calc'd for  $\text{C}_{13}\text{H}_{19}\text{N}$  204.1747; found 204.1749.

***N*-cyclobutylaniline (1b).** Following **GP1** with iodobenzene (0.56 mL, 5 mmol) and BrettPhos (80.5 mg, 0.15 mmol, 3 mol%), the product was isolated after flash chromatography on silica gel (1: 50 EtOAc/hexanes) as colorless oil (570 mg, 78%). IR  $\nu_{\text{max}}$  ( $\text{cm}^{-1}$ ) 3400, 3050, 2934, 1603, 1504, 1315, 1270, 1167, 748;  $^1\text{H}$  NMR (400 MHz, Chloroform-*d*)  $\delta$  7.13 – 7.05 (m, 2H), 6.63 (tt,  $J = 7.3, 1.1$  Hz, 1H), 6.49 (dq,  $J = 7.5, 1.0$  Hz, 2H), 3.91 – 3.72 (m, 2H), 2.43 – 2.24 (m, 2H), 1.84 – 1.62 (m, 4H);  $^{13}\text{C}$  NMR (101 MHz,  $\text{CDCl}_3$ )  $\delta$  147.19, 129.27, 117.40, 113.06, 49.04, 31.28, 15.30; HRMS (ESI)  $m/z$   $[\text{M}+\text{H}]^+$ , calc'd for  $\text{C}_{10}\text{H}_{13}\text{N}$  148.1121; found 148.1126.

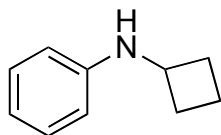

**4-Trifluoromethyl-*N*-cyclobutylaniline (1c).** **1c** is prepared according to Ma's procedure<sup>1</sup>: An oven-dried schlenk tube was charged with CuI (48 mg, 0.25 mmol),  $\text{K}_2\text{CO}_3$  (830 mg, 6 mmol), proline (69 mg, 0.6 mmol), cyclobutylamine (0.51 mL, 6 mmol), 4-iodobenzotrifluoride (0.74 mL, 5 mmol), DMSO (6 mL) and a stir bar. After purging with argon for a few seconds, the tube was sealed with a Teflon screw cap. The mixture was heated at 70 °C for 12 h. The reaction mixture was then cooled to room temperature, quenched with brine and diluted with diethyl ether. The organic layer was separated and the aqueous layer was extracted with diethyl ether. The combined organic layers were dried over  $\text{Na}_2\text{SO}_4$ , filtered, and concentrated under vacuum. Purification of the residual mass by silica gel flash chromatography (1:20 EtOAc/hexanes) afforded the product (1.01 g, 94%) as yellowish oil. IR  $\nu_{\text{max}}$  ( $\text{cm}^{-1}$ ) 3437, 3013, 2977, 2941, 1617, 1533, 1484, 1414, 1325, 1279, 1186, 1157, 1107, 1065, 825;  $^1\text{H}$  NMR (400 MHz, Chloroform-*d*)  $\delta$  7.44 – 7.32 (m, 2H), 6.63 – 6.46 (m, 2H), 4.30 (s, 1H), 4.03 – 3.86 (m, 1H), 2.55 – 2.33 (m, 2H), 1.97 – 1.71 (m, 4H);  $^{13}\text{C}$  NMR (101 MHz,  $\text{CDCl}_3$ )  $\delta$  149.61, 126.65, 125.26 (q,  $J^1 = 270.3$  Hz), 118.86 (q,  $J^2 = 32.5$  Hz), 111.99, 48.51, 30.99, 15.26; HRMS (ESI)  $m/z$   $[\text{M}+\text{H}]^+$ , calc'd for  $\text{C}_{11}\text{H}_{12}\text{F}_3\text{N}$  216.0995; found 216.0986.

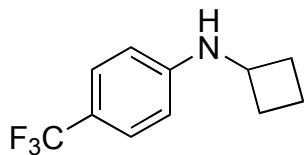

***N*-cyclobutyl-4-methoxyaniline (1d).** Following **GP1** with 1-bromo-4-methoxybenzene (0.68 mL, 5 mmol) and BrettPhos (80.5 mg, 0.15 mmol, 3 mol%), the product was isolated after flash chromatography on silica gel (1: 20 EtOAc/hexanes) as brown oil (0.76 g, 86%). IR  $\nu_{\text{max}}$  ( $\text{cm}^{-1}$ ) 3375, 2935, 2831, 1511, 1464, 1235, 1037, 819;  $^1\text{H}$  NMR (400 MHz, Chloroform-*d*)  $\delta$  6.71 – 6.66 (m, 2H), 6.48 – 6.43 (m, 2H), 3.81 – 3.73 (m, 1H), 3.66 (s, 3H), 2.37 – 2.26 (m, 2H), 1.77 – 1.63 (m, 4H);  $^{13}\text{C}$  NMR (101 MHz,  $\text{CDCl}_3$ )  $\delta$  152.17, 141.34, 127.84, 114.90, 114.45, 55.81, 49.89, 31.28, 15.22; HRMS (ESI)  $m/z$   $[\text{M}+\text{H}]^+$ , calc'd for  $\text{C}_{11}\text{H}_{15}\text{NO}$  178.1226; found 178.1221.

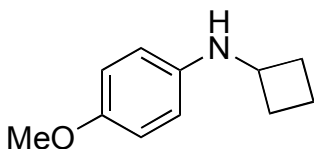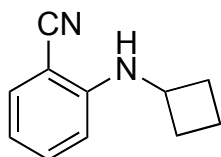

**2-(cyclobutylamino)benzonitrile (1e).** Following **GP1** with 2-bromobenzonitrile (0.364 g, 2 mmol) and (*R*)-Tol-BINAP (41 mg, 0.06 mmol, 3 mol%), the product was isolated after flash

chromatography on silica gel (1:20 EtOAc/hexanes) as colorless oil (279 mg, 81%). IR  $\nu_{\max}$  ( $\text{cm}^{-1}$ ) 3357, 2976, 2936, 2212, 1603, 1576, 1511, 1461, 1324, 1267, 1169, 749;  $^1\text{H}$  NMR (400 MHz, Chloroform-*d*)  $\delta$  7.43 – 7.30 (m, 2H), 6.67 (dddd,  $J = 7.8, 7.3, 1.0, 0.4$  Hz, 1H), 6.57 (ddt,  $J = 8.4, 1.0, 0.5$  Hz, 1H), 3.97 (dq,  $J = 7.9, 7.1$  Hz, 1H), 2.54 – 2.37 (m, 2H), 2.00 – 1.79 (m, 4H);  $^{13}\text{C}$  NMR (101 MHz,  $\text{CDCl}_3$ )  $\delta$  149.23, 134.20, 132.75, 117.96, 116.49, 111.09, 95.48, 77.34, 48.33, 30.88, 15.28; HRMS (ESI)  $m/z$   $[\text{M}+\text{H}]^+$ , calc'd for  $\text{C}_{11}\text{H}_{12}\text{N}_2$  173.1073; found 173.1077.

***N*-cyclobutyl-2-biphenylamine (1f).** Following **GP1** with 2-bromobiphenyl (0.86 mL, 5 mmol) and (*R*)-Tol-BINAP (102 mg, 0.15 mmol, 3 mol%), the product was isolated after a flash chromatography on silica gel (1:30 EtOAc/hexanes) as colorless oil (1.01 g, 91%). IR  $\nu_{\max}$  ( $\text{cm}^{-1}$ ) 3417, 3065, 2979, 2963, 2934, 2880, 1603, 1581, 1507, 1448, 1460, 1312, 1285, 1168, 747;  $^1\text{H}$  NMR (400 MHz, Chloroform-*d*)  $\delta$  7.52 – 7.42 (m, 4H), 7.40 – 7.34 (m, 1H), 7.23 (ddd,  $J = 8.1, 7.3, 1.7$  Hz, 1H), 7.10 (ddd,  $J = 7.5, 1.6, 0.4$  Hz, 1H), 6.78 (td,  $J = 7.4, 1.2$  Hz, 1H), 6.70 – 6.60 (m, 1H), 4.00 – 3.86 (m, 1H), 2.49 – 2.31 (m, 2H), 1.87 – 1.67 (m, 4H);  $^{13}\text{C}$  NMR (75 MHz,  $\text{CDCl}_3$ )  $\delta$  144.16, 139.73, 130.47, 129.49, 129.08, 128.85, 127.61, 127.34, 117.18, 111.23, 49.18, 31.35, 15.44; HRMS (ESI)  $m/z$   $[\text{M}+\text{H}]^+$ , calc'd for  $\text{C}_{16}\text{H}_{17}\text{N}$  224.1434; found 224.1444.

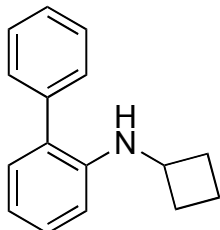

**2-Isopropyl-*N*-cyclobutylaniline (1g).** Following **GP1** with 1-bromo-2-isopropylbenzene (0.31 mL, 2 mmol) and (*R*)-Tol-BINAP (41 mg, 0.06 mmol, 3 mol%), the product was isolated after flash chromatography on silica gel (50:1 EtOAc/hexanes) as colorless oil (272 mg, 72%). IR  $\nu_{\max}$  ( $\text{cm}^{-1}$ ) 3437, 3031, 2962, 2934, 2869, 1603, 1583, 1505, 1450, 1383, 1306, 1266, 1170, 1039, 743;  $^1\text{H}$  NMR (400 MHz, Chloroform-*d*)  $\delta$  7.24 – 7.06 (m, 2H), 6.86 – 6.70 (m, 1H), 6.56 (d,  $J = 8.1$  Hz, 1H), 4.11 – 3.93 (m, 1H), 3.83 (s, 1H), 2.89 (h,  $J = 7.3, 6.8$  Hz, 1H), 2.62 – 2.38 (m, 2H), 1.99 – 1.74 (m, 4H), 1.34 – 1.24 (m, 6H);  $^{13}\text{C}$  NMR (101 MHz,  $\text{CDCl}_3$ )  $\delta$  144.08, 132.27, 126.86, 125.13, 117.51, 111.36, 49.38, 31.63, 27.33, 22.56, 15.56; HRMS (ESI)  $m/z$   $[\text{M}+\text{H}]^+$ , calc'd for  $\text{C}_{13}\text{H}_{19}\text{N}$  190.1590; found 190.1587.

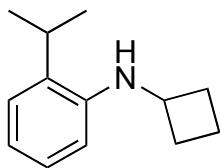

**3,5-Dimethyl-*N*-cyclobutylaniline (1h).** Following **GP1** with 5-bromo-*m*-xylene (0.27 mL, 2 mmol) and BrettPhos (32.2 mg, 0.06 mmol, 3 mol%), the product was isolated after a flash chromatography on silica gel (1:30 EtOAc/hexanes) as colorless oil (343 mg, 98%). IR  $\nu_{\max}$  ( $\text{cm}^{-1}$ ) 3393, 3046, 2976, 2969, 2888, 1603, 1510, 1471, 1334, 1303, 1192, 821;  $^1\text{H}$  NMR (300 MHz, Chloroform-*d*)  $\delta$  6.42 – 6.33 (m, 1H), 6.26 – 6.17 (m, 2H), 4.33 – 3.46 (m, 2H), 2.49 – 2.33 (m, 2H), 2.24 (s, 6H), 1.91 – 1.71 (m, 4H);  $^{13}\text{C}$  NMR (75 MHz,  $\text{CDCl}_3$ )  $\delta$  147.36, 139.09, 119.66, 111.23, 49.28, 31.54, 21.72, 15.45; HRMS (ESI)  $m/z$   $[\text{M}+\text{H}]^+$ , calc'd for  $\text{C}_{12}\text{H}_{17}\text{N}$  176.1434; found 176.1426.

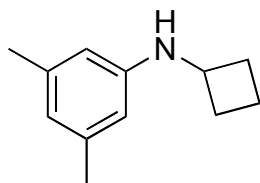

***N*-cyclobutyl-3-pyridinamine (1i).** Following **GP1** with 3-bromopyridine (0.2 mL, 2 mmol) and BrettPhos (32.2 mg, 0.06 mmol, 3 mol%), the product was isolated after flash chromatography on silica gel (2:1 EtOAc/hexanes)

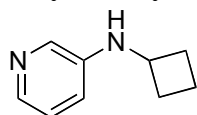

as pale-yellow solid (238 mg, 80%). m.p. 51-52 °C; IR  $\nu_{\max}$  ( $\text{cm}^{-1}$ ) 3266, 3093, 3037, 2976, 2936, 1587, 1519, 1482, 1415, 1313, 1246, 1161, 795;  $^1\text{H}$  NMR (400 MHz, Chloroform-*d*)  $\delta$  8.15 – 7.84 (m, 2H), 7.06 (dd,  $J = 8.4, 4.5$  Hz, 1H), 6.80 (dd,  $J = 8.1, 2.7$  Hz, 1H), 3.90 (p,  $J = 7.9, 7.4$  Hz, 2H), 2.44 (tdd,  $J = 9.0, 5.3, 2.2$  Hz, 2H), 1.84 (pd,  $J = 7.2, 3.4$  Hz, 4H);  $^{13}\text{C}$  NMR (101 MHz,  $\text{CDCl}_3$ )  $\delta$  143.39, 138.81, 136.21, 123.97, 118.99, 48.88, 31.19, 15.39; HRMS (ESI)  $m/z$   $[\text{M}+\text{H}]^+$ , calc'd for  $\text{C}_9\text{H}_{12}\text{N}_2$  149.1073; found 149.1061.

***N*-cyclobutyl-2-pyridinamine (1j).** Following **GP1** with 2-bromopyridine (0.2 mL, 2 mmol) and BrettPhos (32.2 mg, 0.06 mmol, 3 mol%), the product was isolated after flash chromatography on silica gel (2:1 EtOAc/hexanes) as pale-yellow solid (160 mg, 54%). m.p. 40-42 °C; IR  $\nu_{\max}$  ( $\text{cm}^{-1}$ ) 3251, 3031, 3015, 2976, 2939, 2854, 1609, 1573, 1446, 1336, 1291, 1155, 767;  $^1\text{H}$  NMR (400 MHz, Chloroform-*d*)  $\delta$  8.06 (dt,  $J = 4.8, 1.4$  Hz, 1H), 7.42 (ddd,  $J = 8.8, 7.2, 1.9$  Hz, 1H), 6.56 (ddd,  $J = 7.1, 5.1, 1.0$  Hz, 1H), 6.31 (d,  $J = 8.4$  Hz, 1H), 4.83 (s, 1H), 4.12 (h,  $J = 7.5$  Hz, 1H), 2.51 – 2.36 (m, 2H), 1.90 – 1.74 (m, 4H);  $^{13}\text{C}$  NMR (101 MHz,  $\text{CDCl}_3$ )  $\delta$  158.02, 148.28, 137.81, 113.04, 106.51, 47.52, 31.50, 15.39; HRMS (ESI)  $m/z$   $[\text{M}+\text{H}]^+$ , calc'd for  $\text{C}_9\text{H}_{12}\text{N}_2$  149.1073; found 149.1074.

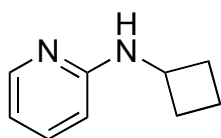

***N*-cyclobutyl-4-fluoroaniline (1k).** Following **GP1** with 1-bromo-4-fluorobenzene (0.22 mL, 2 mmol) and BrettPhos (32.2 mg, 0.06 mmol, 3 mol%), the product was isolated after flash chromatography on silica gel (1:50 EtOAc/hexanes) as yellow oil (0.27 g, 83%). IR  $\nu_{\max}$  ( $\text{cm}^{-1}$ ) 3410, 2973, 2937, 1612, 1511, 1346, 1268, 1216, 1159, 820;  $^1\text{H}$  NMR (400 MHz, Chloroform-*d*)  $\delta$  6.92 – 6.83 (m, 2H), 6.53 – 6.44 (m, 2H), 3.98 – 3.69 (m, 2H), 2.48 – 2.35 (m, 2H), 1.89 – 1.70 (m, 4H);  $^{13}\text{C}$  NMR (101 MHz,  $\text{CDCl}_3$ )  $\delta$  156.06 (d,  $^1J_{\text{CF}} = 234.7$  Hz), 143.65, 115.85 (d,  $^2J_{\text{CF}} = 22.3$  Hz), 114.09 (d,  $^3J_{\text{CF}} = 7.5$  Hz), 49.80, 31.34, 15.43; HRMS (ESI)  $m/z$   $[\text{M}+\text{H}]^+$ , calc'd for  $\text{C}_{10}\text{H}_{12}\text{FN}$  166.1027; found 166.1020.

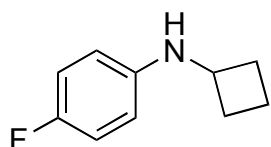

### General procedure 2 (GP2): Synthesis of bicyclic cyclobutylaniline

Bicyclo[3.2.0]heptan-6-one and bicyclo[4.2.0]octan-7-one were prepared according to Mollet's procedure.<sup>2</sup> Conversion of the bicyclic ketone to bicyclic cyclobutylaniline was accomplished via a reductive amination procedure developed by Davies.<sup>3</sup>

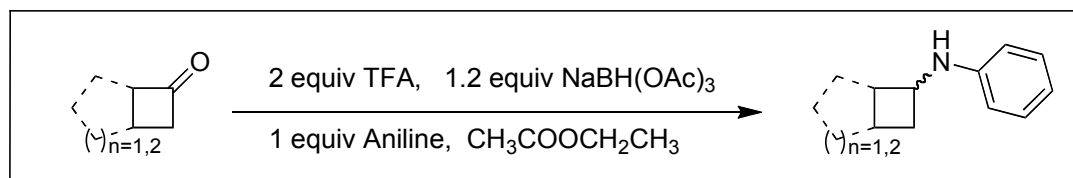

To a 25 mL round bottle flask equipped with a stir bar was added bicyclic ketone (3.6 mmol, 1.1 equiv.), aniline (3.27 mmol, 1 equiv.), trifluoroacetic acid (6.54 mmol, 2 equiv.) and ethyl acetate (6 mL). Sodium triacetoxyborohydride (3.9 mmol, 1.2 equiv.)

was added to the mixture in one portion and the reaction temperature rose to 40 °C. The reaction mixture continued to stir for another 30 minutes, and was monitored by TLC. The reaction mixture was then added with 10% sodium hydroxide solution to adjust the pH to 8-9, followed by the extraction with diethyl ether. The organic layer was then washed with water and brine, dried over sodium sulfate and concentrate. Column chromatography was used to purify the crude product to yield the desired bicyclic cyclobutylaniline with a distereoselectivity of 1:1.

**(1*S*,5*S*,6*R*)-*N*-phenylbicyclo[3.2.0]heptan-6-amine (6a):** Following **GP2** with

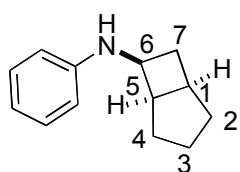

*bicyclo[3.2.0]heptan-6-one* (394 mg, 3.6 mmol), the product was isolated from two diastereomers (**6a** and **6b**, 1:1) after flash chromatography on silica gel (1: 30 EtOAc/hexanes) as a colorless oil (243 mg, 36%). IR  $\nu_{\max}$  (cm<sup>-1</sup>) 3367, 2943, 2861, 1618, 1601, 1500, 1315, 749; <sup>1</sup>H NMR (400 MHz, Chloroform-*d*)  $\delta$  7.33 – 7.09 (m, 2H), 6.74 (q, *J* = 7.2, 6.7 Hz, 1H), 6.62 – 6.51 (m, 2H), 4.06 – 3.94 (m, 1H), 3.06 (qd, *J* = 7.9, 7.1, 2.5 Hz, 1H), 2.79 – 2.61 (m, 2H), 1.88 – 1.78 (m, 2H), 1.76 – 1.69 (m, 1H), 1.57 (dtd, *J* = 12.3, 6.0, 2.9 Hz, 2H), 1.45 (dddd, *J* = 12.4, 10.8, 6.0, 2.6 Hz, 1H), 1.38 – 1.29 (m, 1H); <sup>13</sup>C NMR (101 MHz, CDCl<sub>3</sub>)  $\delta$  129.23, 129.19, 117.18, 112.87, 46.45, 43.30, 33.77, 33.10, 33.07, 26.46, 25.97; HRMS (ESI) *m/z* [M+H]<sup>+</sup>, calc'd for C<sub>13</sub>H<sub>17</sub>N 188.1434; found 188.1439.

**(1*S*,5*S*,6*S*)-*N*-phenylbicyclo[3.2.0]heptan-6-amine (6b):** Following **GP2** with

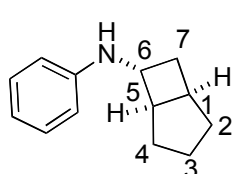

*bicyclo[3.2.0]heptan-6-one* (394 mg, 3.6 mmol), the product was isolated from two diastereomers (**6a** and **6b**, 1:1) after flash chromatography on silica gel (1: 30 EtOAc/hexanes) as a colorless oil (228 mg, 34%). IR  $\nu_{\max}$  (cm<sup>-1</sup>) 3398, 2942, 2852, 1602, 1503, 1314, 1269, 1177, 748; <sup>1</sup>H NMR (400 MHz, Methylene Chloride-*d*<sub>2</sub>)  $\delta$  7.25 – 7.14 (m, 2H), 6.74 (tt, *J* = 7.3, 1.2 Hz, 1H), 6.58 – 6.48 (m, 2H), 3.41 (ddd, *J* = 7.0, 5.8, 3.6 Hz, 1H), 2.88 – 2.76 (m, 1H), 2.54 (td, *J* = 7.4, 3.6 Hz, 1H), 2.02 – 1.95 (m, 2H), 1.92 – 1.78 (m, 3H), 1.62 – 1.52 (m, 3H); <sup>13</sup>C NMR (101 MHz, CDCl<sub>3</sub>)  $\delta$  129.40, 117.67, 113.64, 113.63, 52.47, 46.72, 33.47, 33.39, 32.90, 32.31, 25.58; HRMS (ESI) *m/z* [M+H]<sup>+</sup>, calc'd for C<sub>13</sub>H<sub>17</sub>N 188.1434; found 188.1435.

**(1*S*,5*S*,6*R*)-*N*-(4-iodophenyl)bicyclo[3.2.0]heptan-6-amine (6c):** Following **GP2** with

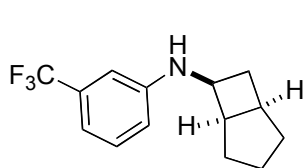

*bicyclo[3.2.0]heptan-6-one* (394 mg, 3.6 mmol) and 3-(trifluoromethyl)aniline (716 mg, 3.27 mmol), the product was isolated from two diastereomers (**6c** and **6c'**, 1:1) after flash chromatography on silica gel (1: 30 EtOAc/hexanes) as a colorless oil (287 mg, 28%). IR  $\nu_{\max}$  (cm<sup>-1</sup>) 3401, 2941, 1590, 1491, 1314, 1179, 809; <sup>1</sup>H NMR (400 MHz, Methylene Chloride-*d*<sub>2</sub>)  $\delta$  7.23 (t, *J* = 7.9 Hz, 1H), 6.88 (d, *J* = 7.7 Hz, 1H), 6.73 – 6.63 (m, 2H), 3.96 (q, *J* = 7.8, 7.2 Hz, 2H), 3.02 (q, *J* = 7.6 Hz, 1H), 2.74 – 2.56 (m, 2H), 1.75 (ddq, *J* = 24.1, 12.2, 5.8 Hz, 2H), 1.59 (dd, *J* = 13.6, 6.8 Hz, 1H), 1.53 – 1.46 (m, 2H), 1.43 – 1.37 (m, 1H), 1.36 – 1.24 (m, 1H); <sup>13</sup>C NMR (101 MHz, CD<sub>2</sub>Cl<sub>2</sub>)  $\delta$  148.01, 131.71 (q, *J*<sup>2</sup> = 31.5 Hz), 129.57, 125.1 (q, *J*<sup>1</sup> = 272.2 Hz), 115.59, 112.94, 108.57, 46.13, 43.09, 33.83, 32.93, 32.71, 26.31, 25.83; HRMS (ESI) *m/z* [M+H]<sup>+</sup>, calc'd for C<sub>13</sub>H<sub>16</sub>IN 314.0400; found 314.0410.

**(1*S*,5*S*,6*S*)-*N*-(4-iodophenyl)bicyclo[3.2.0]heptan-6-amine (6c')**: Following **GP2** with bicyclo[3.2.0]heptan-6-one (394 mg, 3.6 mmol) and 3-(trifluoromethyl)aniline (716 mg, 3.27 mmol), the product was isolated from two diastereomers (**6c** and **6c'**, 1:1) after flash chromatography on silica gel (1: 30 EtOAc/hexanes) as a colorless oil (273 mg, 27%). IR  $\nu_{\max}$  (cm<sup>-1</sup>) 3369, 2930, 2857, 1589, 1490, 1179, 808; <sup>1</sup>H NMR (400 MHz, Methylene Chloride-*d*<sub>2</sub>)  $\delta$  7.28 (t, *J* = 7.8 Hz, 1H), 6.97 – 6.90 (m, 1H), 6.75 – 6.63 (m, 2H), 4.29 – 4.15 (m, 1H), 3.41 (td, *J* = 5.9, 4.7, 2.5 Hz, 1H), 2.90 – 2.78 (m, 1H), 2.53 (td, *J* = 7.5, 3.6 Hz, 1H), 2.03 – 1.97 (m, 2H), 1.93 – 1.78 (m, 3H), 1.63 – 1.53 (m, 3H); <sup>13</sup>C NMR (75 MHz, CD<sub>2</sub>Cl<sub>2</sub>)  $\delta$  147.58, 131.68 (q, *J*<sup>2</sup> = 31.4 Hz), 129.55, 125.08 (q, *J*<sup>1</sup> = 272.1 Hz), 116.19, 113.16, 109.03, 51.82, 46.47, 33.34, 32.86, 32.57, 31.99, 25.31; HRMS (ESI) *m/z* [M+H]<sup>+</sup>, calc'd for C<sub>13</sub>H<sub>16</sub>IN 314.0400; found 314.0399.

**(1*S*,5*S*,6*R*)-*N*-(3-(trifluoromethyl)phenyl)bicyclo[3.2.0]heptan-6-amine (6d)**:

Following **GP2** with bicyclo[3.2.0]heptan-6-one (394 mg, 3.6 mmol) and 4-iodoaniline (0.41 mL, 3.27 mmol), the product was isolated from two diastereomers (**6d** and **6d'**, 1:1) after flash chromatography on silica gel (1: 50 EtOAc/hexanes) as a colorless oil (259 mg, 31%). IR  $\nu_{\max}$  (cm<sup>-1</sup>) 3418, 2949, 2856, 1493, 1342, 1162, 1069, 767; <sup>1</sup>H NMR (400 MHz, Methylene Chloride-*d*<sub>2</sub>)  $\delta$  7.46 – 7.31 (m, 2H), 6.38 – 6.24 (m, 2H), 3.95 – 3.82 (m, 1H), 2.98 (tdd, *J* = 8.6, 4.4, 1.6 Hz, 1H), 2.72 – 2.53 (m, 2H), 1.81 – 1.73 (m, 1H), 1.73 – 1.65 (m, 1H), 1.59 – 1.53 (m, 1H), 1.47 (ddd, *J* = 12.6, 6.3, 4.8 Hz, 2H), 1.41 – 1.33 (m, 1H), 1.31 – 1.24 (m, 1H); <sup>13</sup>C NMR (101 MHz, CD<sub>2</sub>Cl<sub>2</sub>)  $\delta$  147.43, 137.61, 114.83, 76.89, 46.13, 43.16, 33.82, 32.96, 32.72, 26.34, 25.83; HRMS (ESI) *m/z* [M+H]<sup>+</sup>, calc'd for C<sub>14</sub>H<sub>16</sub>F<sub>3</sub>N 256.1308; found 256.1313.

**(1*S*,5*S*,6*S*)-*N*-(4-(trifluoromethyl)phenyl)bicyclo[3.2.0]heptan-6-amine (6d')**:

Following **GP2** with bicyclo[3.2.0]heptan-6-one (394 mg, 3.6 mmol) and 4-iodoaniline (0.41 mL, 3.27 mmol), the product was isolated from two diastereomers (**6d** and **6d'**, 1:1) after flash chromatography on silica gel (1: 50 EtOAc/hexanes) as a colorless oil (218 mg, 26%). IR  $\nu_{\max}$  (cm<sup>-1</sup>) 3421, 2947, 2856, 1616, 1515, 1342, 1123, 787; <sup>1</sup>H NMR (400 MHz, Methylene Chloride-*d*<sub>2</sub>)  $\delta$  7.46 – 7.34 (m, 2H), 6.36 – 6.23 (m, 2H), 3.35 (td, *J* = 6.7, 3.6 Hz, 1H), 2.88 – 2.72 (m, 1H), 2.50 (td, *J* = 7.4, 3.6 Hz, 1H), 1.99 – 1.93 (m, 2H), 1.91 – 1.82 (m, 2H), 1.81 – 1.74 (m, 1H), 1.56 (tdd, *J* = 7.3, 5.0, 2.3 Hz, 3H); <sup>13</sup>C NMR (101 MHz, CD<sub>2</sub>Cl<sub>2</sub>)  $\delta$  147.00, 137.62, 115.32, 77.12, 51.85, 46.50, 33.35, 32.93, 32.58, 32.01, 25.29; HRMS (ESI) *m/z* [M+H]<sup>+</sup>, calc'd for C<sub>14</sub>H<sub>16</sub>F<sub>3</sub>N 256.1308; found 256.1311.

**(1*S*,6*S*,7*R*)-*N*-phenylbicyclo[4.2.0]octan-7-amine (6e)**: Following **GP2** with bicyclo[4.2.0]octan-7-one (440 mg, 3.6 mmol), the product was isolated from two diastereomers (**6e** and **6f**, 1:1) after flash chromatography on silica gel (1: 50 EtOAc/hexanes) as a colorless oil (217 mg, 33%). IR  $\nu_{\max}$  (cm<sup>-1</sup>) 3382, 2928, 2858, 1602, 1499, 1314, 1176, 749; <sup>1</sup>H NMR (400 MHz, Chloroform-*d*)  $\delta$  7.13 – 7.06 (m, 2H), 6.60 (m, 1H), 6.56 – 6.52 (m, 2H), 4.00 – 3.83 (m, 1H),

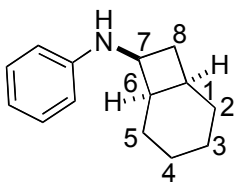

3.74 (dt,  $J = 9.5, 6.7$  Hz, 1H), 2.57 (dddd,  $J = 14.9, 12.0, 9.4, 6.4$  Hz, 1H), 2.28 – 2.13 (m, 2H), 1.90 – 1.82 (m, 1H), 1.62 – 1.51 (m, 3H), 1.51 – 1.42 (m, 3H), 1.35 – 1.27 (m, 1H), 1.06 – 1.00 (m, 1H);  $^{13}\text{C}$  NMR (101 MHz,  $\text{CDCl}_3$ )  $\delta$  148.47, 129.63, 117.27, 112.93, 48.48, 38.54, 31.25, 27.12, 26.44, 23.33, 22.45, 21.26; HRMS (ESI)  $m/z$   $[\text{M}+\text{H}]^+$ , calc'd for  $\text{C}_{14}\text{H}_{19}\text{N}$  202.1590; found 202.1597.

**(1*S*,6*S*,7*S*)-*N*-phenylbicyclo[4.2.0]octan-7-amine (6f):** Following **GP2** with bicyclo[4.2.0]octan-7-one (440 mg, 3.6 mmol), the product was isolated from two diastereomers (**6e** and **6f**, 1:1) after a flash chromatography on silica gel (1: 50 EtOAc/hexane) as a colorless oil (224 mg, 34%). IR  $\nu_{\text{max}}$  ( $\text{cm}^{-1}$ ) 3398, 2927, 2853, 1601, 1502, 1315, 1261, 748;  $^1\text{H}$  NMR (400 MHz, Methylene Chloride- $d_2$ )  $\delta$  7.14 – 6.99 (m, 2H), 6.60 (tt,  $J = 7.3, 1.1$  Hz, 1H), 6.56 – 6.46 (m, 2H), 3.89

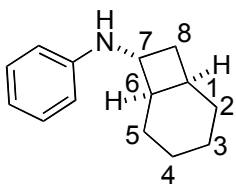

(q,  $J = 7.4$  Hz, 1H), 2.19 – 2.08 (m, 2H), 2.06 – 2.00 (m, 1H), 1.93 – 1.84 (m, 1H), 1.70 – 1.51 (m, 4H), 1.43 (dddt,  $J = 15.5, 11.3, 6.6, 2.2$  Hz, 2H), 1.35 – 1.23 (m, 1H), 1.15 – 1.03 (m, 1H);  $^{13}\text{C}$  NMR (101 MHz,  $\text{CD}_2\text{Cl}_2$ )  $\delta$  148.43, 129.68, 117.43, 113.26, 50.07, 42.81, 36.12, 30.42, 27.40, 25.9; HRMS (ESI)  $m/z$   $[\text{M}+\text{H}]^+$ , calc'd for  $\text{C}_{14}\text{H}_{19}\text{N}$  202.1590; found 202.1593.

### Catalyst optimization

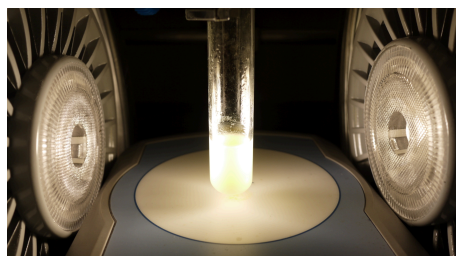

4-*tert*-Butyl-*N*-cyclobutylaniline (**1a**, 41 mg, 0.2 mmol), phenylacetylene (**2a**, 0.12 mL, 1.0 mmol), catalyst (2 mol%), and solvent (2 mL) were mixed together in a 10 mL test tube. The test tube was capped with a Teflon screw cap and then degassed using Freeze-Pump-Thaw (3 cycles). The degassed mixture was irradiated with two LED (18 watts) positioned 6 cm from the test tube for 14 h (unless noted). After that, the reaction mixture was diluted with  $\text{Et}_2\text{O}$  (2 mL) and *n*-dodecane (45  $\mu\text{L}$ ) was added as an internal standard. An aliquot (0.5 mL) was filtered through a syringe filter, diluted to 1 mL, and analyzed by GC.

- For entry 1, one LED light was used instead of two.
- For entries 3-6, nitromethane ( $\text{CH}_3\text{NO}_2$ ), dimethylformamide (DMF), dimethyl sulfoxide (DMSO) and methanol (MeOH) were used as solvent respectively.
- For entry 7, the reaction was conducted without degassing via Freeze-Pump-Thaw cycles.
- For entry 11, no  $[\text{Ir}(\text{ppy})_2(\text{dtbbpy})\text{PF}_6]$  **4a** was added.
- For entry 12, the reaction was conducted inside a dark cabinet.
- For entry 13, the reaction was conducted with one LED light at room temperature.



- For entry 14, the reaction was conducted in a 55 °C water bath with one LED light. For details, see the *Temperature Control study* shown below.

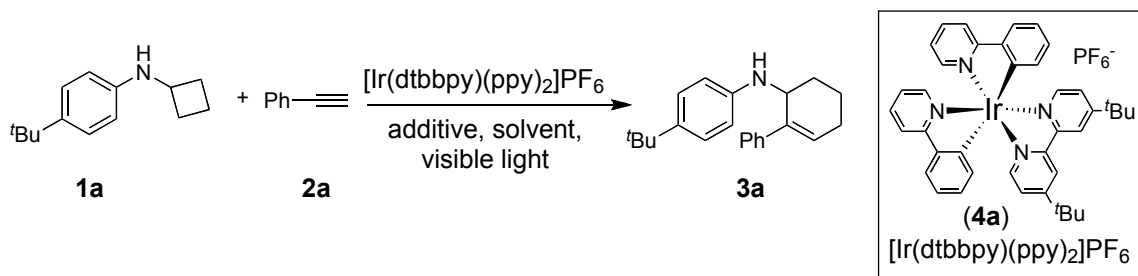

| Entry <sup>[a]</sup> | Condition                                           | t [h] | Conv. of <b>1 a</b> [%] <sup>[b]</sup> | Yield of <b>3 a</b> [%] <sup>[b]</sup> |
|----------------------|-----------------------------------------------------|-------|----------------------------------------|----------------------------------------|
| 1 <sup>[c]</sup>     | <b>4b</b> (2mol%), CH <sub>3</sub> NO <sub>2</sub>  | 16    | 11                                     | 9                                      |
| 2                    | <b>4b</b> (2mol%), CH <sub>3</sub> NO <sub>2</sub>  | 16    | 40                                     | 30                                     |
| 3                    | <b>4a</b> (2 mol%), CH <sub>3</sub> NO <sub>2</sub> | 16    | 100                                    | 47                                     |
| 4                    | <b>4a</b> (2 mol%), DMF                             | 16    | 90                                     | 86                                     |
| 5                    | <b>4a</b> (2 mol%), DMSO                            | 16    | 100                                    | 90                                     |
| 6                    | <b>4a</b> (2 mol%), MeOH                            | 12    | 100                                    | 97 (90) <sup>[d]</sup>                 |
| 7                    | <b>4a</b> (2 mol%), Air, MeOH                       | 16    | 100                                    | 42                                     |
| 8                    | <b>4b</b> (2mol%), MeOH                             | 16    | 52                                     | 37                                     |
| 9                    | <b>4c</b> (2mol%), MeOH                             | 16    | 82                                     | 60                                     |
| 10                   | <b>4d</b> (2mol%), MeOH                             | 16    | 11                                     | 8                                      |
| 11                   | without <b>4a</b> , MeOH                            | 16    | 7                                      | 3                                      |
| 12                   | <b>4a</b> (2mol%), MeOH, light bulb off             | 16    | 10                                     | 7                                      |
| 13 <sup>[c]</sup>    | <b>4a</b> (2 mol%), MeOH                            | 16    | 29                                     | 27                                     |
| 14 <sup>[e]</sup>    | <b>4a</b> (2 mol%), MeOH                            | 12    | 70                                     | 68                                     |

[a] Reaction conditions: **1a** (0.2 mmol, 0.1 M in degassed solvent), **2a** (1mmol), irradiation with two 18 W LED lightbulb at room temperature.

[b] Yields determined by GC analysis using dodecane as an internal standard unless noted. [c] One 18 W LED light. [d] Isolated yield by silica gel column chromatography. [e] One 18 W LED light, reaction tube in a 55 °C water bath.

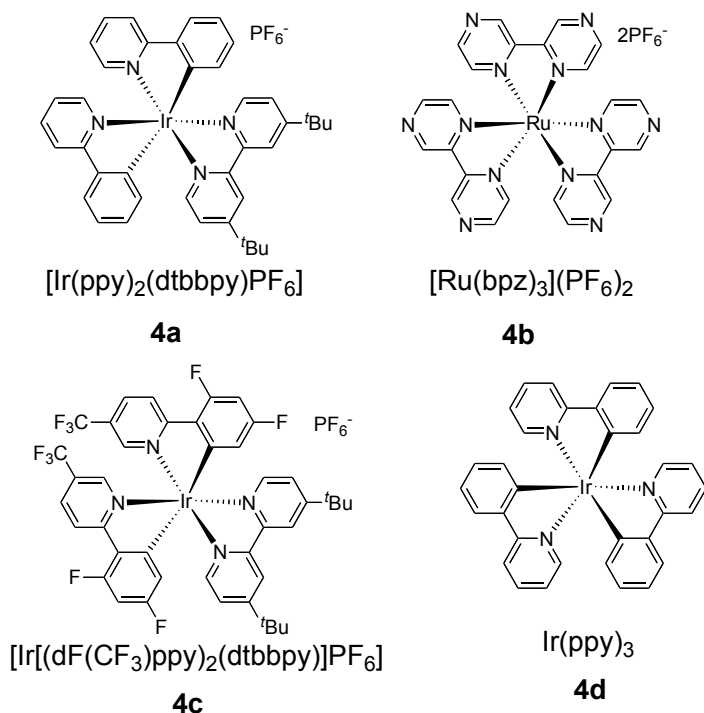

Conducting the experiment without degassing the reaction mixture led to significant decrease in the yield (entry 7). This observation is consistent with what we witnessed in the [3+2] annulation of cyclopropanilines and alkynes.<sup>[4a]</sup> We previously showed that upon exposure to air under the optimized conditions, cyclopropanilines underwent ring opening and then reacted with oxygen to form an endoperoxide byproduct.<sup>[4b]</sup> Presumably a similar process occurred with cyclobutylanilines, which resulted in the lower yield.

#### **Temperature control study:**

An oven-dried test tube equipped with a stir bar was charged with  $\text{Ir}(\text{dtbbpy})(\text{ppy})_2\text{PF}_6$  (2 mol%), cyclobutylaniline **1a** (0.2 mmol), alkyne **2a** (1 mmol) and MeOH (2 mL). The test tube was capped with a Teflon screw cap and followed by degassing using Freeze-Pump-Thaw sequence three times. The reaction mixture was then put into a PYREX 100 x 50 water bath which was preheated to 55 °C and irradiated with 1 LED (18 watts) positioned 6 cm from the test tube. After 12 h, the reaction was stopped and analyzed by GC with dodecane as internal standard. The GC analysis showed that **3a** was formed in 68% GC yield (71% conversion of **1a**).

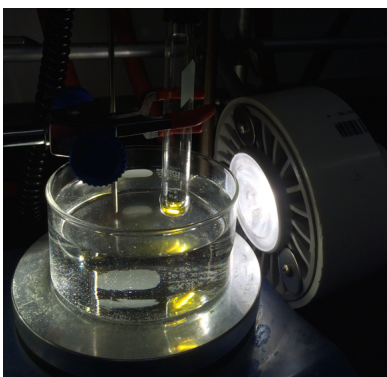

#### **General Procedure 3 (GP3); Visible light catalyzed [4+2] annulation reaction**

An oven-dried test tube equipped with a stir bar was charged with Ir(dtbbpy)(ppy)<sub>2</sub>PF<sub>6</sub> (2 mol%) and cyclobutylaniline derivative (0.2 mmol), alkyne derivative (0.6 mmol) (phenylacetylene was used in 1 mmol scale), and MeOH (2 mL). The test tube was capped with a Teflon screw cap and followed by degassing using Freeze-Pump-Thaw sequence three times. The reaction mixture was then irradiated with two LED (18 watts) positioned 6 cm from the test tube. After the reaction was complete as monitored by TLC, the mixture was dilute with diethyl ether and filtered through a short pad of silica gel. The solution was concentrated and the residue was purified by silica gel flash chromatography to afford the corresponding annulation product.

## Compounds in Table 2

**4-tert-butyl-N-(2-phenylcyclohex-2-enyl)aniline (3a):** Following GP3 with **1a** (41 mg, 0.2 mmol) and phenylacetylene (**2a**) (0.12 mL, 1 mmol), the product was isolated after flash chromatography on silica gel (1: 30 EtOAc/hexanes) as brown oil (55 mg, 90%). IR  $\nu_{\max}$  (cm<sup>-1</sup>) 3424, 3024, 2950, 2904, 2862, 1612, 1517, 1473, 1361, 1320, 1252, 1193, 818; <sup>1</sup>H NMR (400 MHz, Chloroform-*d*)  $\delta$  7.43 (d, *J* = 7.5 Hz, 2H), 7.30 – 7.22 (m, 2H), 7.22 – 7.17 (m, 3H), 6.61 (d, *J* = 8.2 Hz, 2H), 6.39 – 6.26 (m, 1H), 4.48 (d, *J* = 3.3 Hz, 1H), 2.38 – 2.10 (m, 3H), 1.65 (dd, *J* = 13.8, 10.0 Hz, 3H), 1.28 (s, 9H); <sup>13</sup>C NMR (75 MHz, CDCl<sub>3</sub>)  $\delta$  144.51, 140.52, 139.90, 137.28, 129.07, 128.58, 127.13, 126.26, 125.73, 112.89, 48.41, 34.04, 31.77, 27.45, 26.20, 17.20; HRMS (ESI) *m/z* [M+H]<sup>+</sup>, calc'd for C<sub>22</sub>H<sub>27</sub>N 306.2216; found 306.2214.

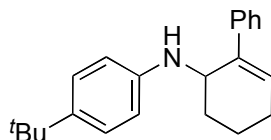

**N-(2-phenylcyclohex-2-enyl)aniline (3b):** Following GP3 with **1b** (30 mg, 0.2 mmol) and phenylacetylene (**2a**) (0.12 mL, 1 mmol), the product was isolated after flash chromatography on silica gel (1: 50 EtOAc/hexanes) as yellow oil (37 mg, 76%). IR  $\nu_{\max}$  (cm<sup>-1</sup>) 3400, 3020, 2927, 2864, 1598, 1500, 1424, 1310, 1251, 1161, 750; <sup>1</sup>H NMR (400 MHz, Chloroform-*d*)  $\delta$  7.50 – 7.44 (m, 2H), 7.34 – 7.26 (m, 2H), 7.26 – 7.17 (m, 3H), 6.71 (tq, *J* = 7.3, 0.9 Hz, 1H), 6.68 – 6.61 (m, 2H), 6.38 (dd, *J* = 5.0, 3.0 Hz, 1H), 4.51 (d, *J* = 2.5 Hz, 1H), 3.84 (d, *J* = 20.8 Hz, 1H), 2.53 – 2.14 (m, 3H), 1.88 – 1.62 (m, 3H); <sup>13</sup>C NMR (101 MHz, CDCl<sub>3</sub>)  $\delta$  147.03, 140.20, 137.05, 129.35, 128.81, 128.44, 127.02, 125.47, 116.92, 112.84, 48.01, 27.46, 26.01, 17.09; HRMS (ESI) *m/z* [M+H]<sup>+</sup>, calc'd for C<sub>19</sub>H<sub>21</sub>N 250.1590; found 250.1594.

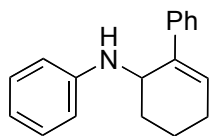

**N-(2-phenylcyclohex-2-enyl)-4-(trifluoromethyl)aniline (3c):** Following GP3 with **1c** (43 mg, 0.2 mmol) and phenylacetylene (**2a**) (0.12 mL, 1 mmol), the product was isolated after flash chromatography on silica gel (1: 20 EtOAc/hexanes) as yellow solid (50 mg, 79%). m.p. 75-77 °C; IR  $\nu_{\max}$  (cm<sup>-1</sup>) 3414, 3047, 2933, 2873, 1614, 1528, 1485, 1322, 1259, 1109, 1058, 823; <sup>1</sup>H NMR (400 MHz, Benzene-*d*<sub>6</sub>)  $\delta$  7.35 – 7.27 (m, 4H), 7.15 – 7.09 (m, 2H), 7.09 – 7.03 (m, 1H), 6.12 (ddd, *J* = 4.8, 2.3, 1.5 Hz, 1H), 6.03 (d, *J* = 8.5 Hz, 2H), 4.22 – 4.12 (m, 1H), 3.56 (d, *J* = 7.3 Hz, 1H), 2.04 – 1.70 (m, 3H), 1.42 – 1.29 (m, 3H); <sup>13</sup>C NMR (101 MHz, C<sub>6</sub>D<sub>6</sub>)  $\delta$  149.97, 140.42, 136.99, 129.25, 129.14, 127.89, 127.36 (q, *J*<sup>3</sup> = 3.8 Hz), 126.38 (q, *J*<sup>1</sup> = 270.1 Hz), 125.94,

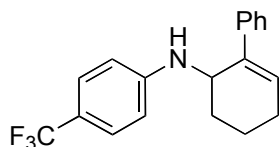

119.03 (q,  $J^2 = 32.4$  Hz), 112.47, 48.06, 27.85, 26.41, 17.59; HRMS (ESI)  $m/z$   $[M+H]^+$ , calc'd for  $C_{19}H_{18}F_3N$  318.1464; found 318.1464.

**4-methoxy-N-(2-phenylcyclohex-2-enyl)aniline (3d):** Following **GP3** with **1d** (36 mg, 0.2 mmol) and phenylacetylene (**2a**) (0.12 mL, 1 mmol), the product was isolated after a flash chromatography on silica gel (1: 50 EtOAc/hexanes) as brown oil (16 mg, 28%). IR  $\nu_{\max}$  ( $cm^{-1}$ ) 3405, 3026, 2931, 2859, 2830, 1608, 1510, 1442, 1402, 1237, 1174, 1036, 818;  $^1H$  NMR (300 MHz, Chloroform-*d*)  $\delta$  7.55 – 7.41 (m, 2H), 7.34 – 7.20 (m, 3H), 6.88 – 6.74 (m, 2H), 6.69 – 6.56 (m, 2H), 6.41 – 6.28 (m, 1H), 4.48 – 4.35 (m, 1H), 3.76 (s, 3H), 2.41 – 2.06 (m, 3H), 1.69 (dd,  $J = 3.5, 1.7$  Hz, 3H);  $^{13}C$  NMR (75 MHz,  $CDCl_3$ )  $\delta$  151.88, 141.14, 140.31, 137.20, 128.73, 128.41, 126.97, 125.51, 114.98, 114.34, 55.85, 49.12, 27.45, 26.01, 17.01; HRMS (ESI)  $m/z$   $[M+H]^+$ , calc'd for  $C_{19}H_{21}NO$  280.1696; found 280.1701.

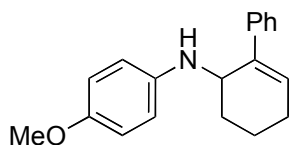

**2-(2-phenylcyclohex-2-enylamino)benzonitrile (3e):** Following **GP3** with **1e** (35 mg, 0.2 mmol) and phenylacetylene (**2a**) (0.12 mL, 1 mmol), the product was isolated after a flash chromatography on silica gel (1: 20 EtOAc/hexanes) as brown oil (46 mg, 84%). IR  $\nu_{\max}$  ( $cm^{-1}$ ) 3420, 3024, 2932, 2867, 2832, 2209, 1602, 1574, 1505, 1449, 1442, 1318, 1284, 1165, 1070, 751;  $^1H$  NMR (400 MHz, Chloroform-*d*)  $\delta$  7.69 – 7.35 (m, 5H), 7.35 – 7.23 (m, 2H), 6.85 (d,  $J = 8.5$  Hz, 1H), 6.68 (t,  $J = 7.5$  Hz, 1H), 6.38 (dd,  $J = 4.9, 2.9$  Hz, 1H), 4.63 (d,  $J = 21.9$  Hz, 2H), 2.47 – 2.01 (m, 3H), 1.90 – 1.52 (m, 3H);  $^{13}C$  NMR (75 MHz,  $CDCl_3$ )  $\delta$  149.12, 139.94, 136.12, 134.27, 133.09, 129.99, 128.50, 127.25, 125.50, 117.77, 116.37, 110.79, 96.07, 48.09, 27.56, 25.79, 16.93. HRMS (ESI)  $m/z$   $[M+H]^+$ , calc'd for  $C_{19}H_{18}N_2$  275.1543; found 275.1524.

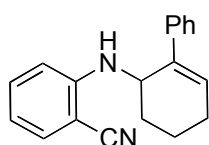

**N-(2-phenylcyclohex-2-enyl)biphenyl-2-amine (3f):** Following **GP3** with **1f** (45 mg, 0.2 mmol) and phenylacetylene (**2a**) (0.12 mL, 1 mmol), the product was isolated after a flash chromatography on silica gel (1: 50 EtOAc/hexanes) as white solid (54 mg, 83%). m.p. 125-128 °C; IR  $\nu_{\max}$  ( $cm^{-1}$ ) 3419, 3053, 2921, 1595, 1504, 1486, 1434, 1310, 1282, 760;  $^1H$  NMR (300 MHz, Chloroform-*d*)  $\delta$  7.36 – 7.21 (m, 9H), 7.09 – 6.97 (m, 3H), 6.88 (d,  $J = 8.2$  Hz, 1H), 6.75 (t,  $J = 7.3$  Hz, 1H), 6.17 (t,  $J = 3.9$  Hz, 1H), 4.49 (t,  $J = 3.4$  Hz, 1H), 2.12 (ddd,  $J = 14.1, 5.8, 2.8$  Hz, 3H), 1.82 – 1.42 (m, 3H);  $^{13}C$  NMR (75 MHz,  $CDCl_3$ )  $\delta$  143.74, 140.67, 139.26, 137.41, 130.50, 129.14, 129.02, 128.78, 128.69, 128.39, 127.87, 127.00, 126.92, 125.94, 116.73, 110.47, 49.09, 28.06, 25.87, 17.44; HRMS (ESI)  $m/z$   $[M+H]^+$ , calc'd for  $C_{24}H_{23}N$  326.1903; found 326.1907.

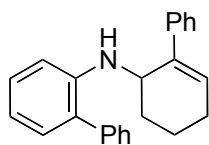

**2-isopropyl-N-(2-phenylcyclohex-2-enyl)aniline (3g):** Following **GP3** with **1g** (38 mg, 0.2 mmol) and phenylacetylene (**2a**) (0.12 mL, 1 mmol), the product was isolated after a flash chromatography on silica gel (1: 30 EtOAc/hexanes) as yellow oil (44 mg, 76%). IR  $\nu_{\max}$  ( $cm^{-1}$ ) 3441, 3029, 2958, 2932, 2865, 1602, 1582, 1503, 1448, 1358, 1306, 1253, 757;  $^1H$  NMR (400 MHz, Chloroform-*d*)  $\delta$  7.47 – 7.42 (m, 2H), 7.30 – 7.24 (m, 2H), 7.23 – 7.18 (m, 1H), 7.18 – 7.11 (m, 2H), 6.82 (dt,  $J = 8.0, 0.9$  Hz, 1H), 6.74 (td,  $J = 7.5, 1.2$  Hz, 1H), 6.41 – 6.35 (m, 1H), 4.55 (d,  $J = 3.7$  Hz, 1H), 2.66 (hept,  $J = 7.5, 1.2$  Hz, 1H), 1.00 (d,  $J = 6.8$  Hz, 6H);  $^{13}C$  NMR (75 MHz,  $CDCl_3$ )  $\delta$  143.74, 140.67, 139.26, 137.41, 130.50, 129.14, 129.02, 128.78, 128.69, 128.39, 127.87, 127.00, 126.92, 125.94, 116.73, 110.47, 49.09, 28.06, 25.87, 17.44; HRMS (ESI)  $m/z$   $[M+H]^+$ , calc'd for  $C_{24}H_{23}N$  326.1903; found 326.1907.

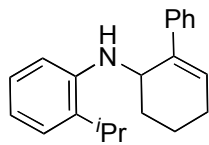

= 6.8 Hz, 1H), 2.40 – 2.15 (m, 3H), 1.79 – 1.67 (m, 3H), 1.22 (d,  $J = 6.8$  Hz, 3H), 0.97 (d,  $J = 6.8$  Hz, 3H);  $^{13}\text{C}$  NMR (101 MHz,  $\text{CDCl}_3$ )  $\delta$  143.61, 140.28, 137.34, 131.96, 128.81, 128.42, 127.01, 126.75, 125.54, 125.10, 116.72, 110.03, 48.22, 27.57, 27.11, 26.06, 22.15, 17.39; HRMS (ESI)  $m/z$   $[\text{M}+\text{H}]^+$ , calc'd for  $\text{C}_{21}\text{H}_{25}\text{N}$  292.2060; found 292.2065.

**3,5-dimethyl-N-(2-phenylcyclohex-2-enyl)aniline (3h):** Following **GP3** with **1h** (35 mg, 0.2 mmol) and phenylacetylene (**2a**) (0.12 mL, 1 mmol), the product was isolated after a flash chromatography on silica gel (1: 50 EtOAc/hexanes) as yellow oil (46 mg, 87%). IR  $\nu_{\text{max}}$  ( $\text{cm}^{-1}$ ) 3417, 3031, 2935, 2860, 1598, 1507, 1496, 1443, 1339, 1189, 819;  $^1\text{H}$  NMR (400 MHz, Chloroform- $d$ )  $\delta$  7.53 – 7.40 (m, 2H), 7.34 – 7.26 (m, 2H), 7.24 – 7.17 (m, 1H), 6.42 – 6.32 (m, 2H), 6.29 (s, 2H), 4.49 (t,  $J = 3.0$  Hz, 1H), 2.43 – 2.09 (m, 9H), 1.81 – 1.57 (m, 3H);  $^{13}\text{C}$  NMR (75 MHz,  $\text{CDCl}_3$ )  $\delta$  147.11, 140.42, 139.16, 137.23, 128.90, 128.59, 127.13, 125.63, 119.15, 110.92, 48.02, 27.61, 26.19, 21.75, 17.22; HRMS (ESI)  $m/z$   $[\text{M}+\text{H}]^+$ , calc'd for  $\text{C}_{20}\text{H}_{23}\text{N}$  278.1903; found 278.1905.

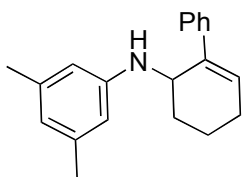

**N-(2-phenylcyclohex-2-enyl)pyridin-3-amine (3i):** Following **GP3** with **1i** (30 mg, 0.2 mmol) and phenylacetylene (**2a**) (0.12 mL, 1 mmol), the product was isolated after a flash chromatography on silica gel (1: 5 EtOAc/hexanes) as yellow solid (37 mg, 73%). m.p. 132-134 °C; IR  $\nu_{\text{max}}$  ( $\text{cm}^{-1}$ ) 3255, 3086, 3028, 2927, 2859, 2213, 1580, 1506, 1481, 1415, 1318, 1296, 786;  $^1\text{H}$  NMR (400 MHz, Chloroform- $d$ )  $\delta$  8.08 (d,  $J = 2.7$  Hz, 1H), 7.88 (d,  $J = 5.0$  Hz, 1H), 7.40 – 7.33 (m, 2H), 7.31 – 7.26 (m, 2H), 7.25 – 7.19 (m, 2H), 7.13 – 7.04 (m, 1H), 6.35 (dd,  $J = 5.0, 3.0$  Hz, 1H), 4.47 (d,  $J = 10.0$  Hz, 2H), 2.40 – 2.16 (m, 2H), 2.12 – 2.01 (m, 1H), 1.83 – 1.63 (m, 3H);  $^{13}\text{C}$  NMR (101 MHz,  $\text{CDCl}_3$ )  $\delta$  143.40, 140.08, 137.86, 136.77, 135.55, 129.59, 128.68, 127.40, 125.63, 124.16, 119.10, 48.10, 27.55, 26.08, 17.26; HRMS (ESI)  $m/z$   $[\text{M}+\text{H}]^+$ , calc'd for  $\text{C}_{17}\text{H}_{18}\text{N}_2$  251.1543; found 251.1542.

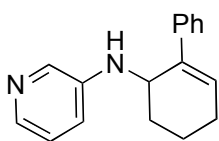

**N-(2-phenylcyclohex-2-enyl)pyridin-2-amine (3j):** Following **GP3** with **1j** (30 mg, 0.2 mmol) and phenylacetylene (**2a**) (0.12 mL, 1 mmol), the product was isolated after a flash chromatography on silica gel (1: 5 EtOAc/hexanes) as yellow solid (39 mg, 78%). m.p. 83-84 °C; IR  $\nu_{\text{max}}$  ( $\text{cm}^{-1}$ ) 3425, 3020, 2931, 1600, 1570, 1484, 1442, 755;  $^1\text{H}$  NMR (400 MHz, Chloroform- $d$ )  $\delta$  8.00 (ddt,  $J = 5.1, 1.8, 0.8$  Hz, 1H), 7.33 (ddt,  $J = 7.0, 1.3, 0.7$  Hz, 2H), 7.30 – 7.23 (m, 1H), 7.21 – 7.14 (m, 2H), 7.13 – 7.05 (m, 1H), 6.44 (ddt,  $J = 7.0, 5.1, 0.9$  Hz, 1H), 6.29 – 6.20 (m, 2H), 4.88 – 4.80 (m, 1H), 4.54 (d,  $J = 8.0$  Hz, 1H), 2.27 – 2.07 (m, 2H), 2.07 – 1.97 (m, 1H), 1.76 – 1.67 (m, 1H), 1.63 (ttd,  $J = 10.6, 6.1, 5.3, 3.4$  Hz, 2H);  $^{13}\text{C}$  NMR (101 MHz,  $\text{CDCl}_3$ )  $\delta$  157.51, 147.93, 140.12, 137.34, 137.13, 129.16, 128.37, 127.01, 125.61, 112.48, 107.56, 46.35, 28.55, 26.02, 17.44. HRMS (ESI)  $m/z$   $[\text{M}+\text{H}]^+$ , calc'd for  $\text{C}_{17}\text{H}_{18}\text{N}_2$  251.1543; found 251.1542.

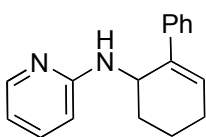

### Compounds in Table 3

**4-tert-butyl-N-(2-(naphthalen-1-yl)cyclohex-2-enyl)aniline (5a):** Following **GP3** with **1a** (41 mg, 0.2 mmol) and 1-ethylnaphthalene (**2b**) (91 mg, 0.6 mmol), the product was isolated after a flash chromatography on silica gel (1: 30 EtOAc/hexanes) as yellow oil (50, 71%). IR  $\nu_{\max}$  (cm<sup>-1</sup>) 3395, 3043, 2926, 1603, 1514, 1463, 1391, 1296, 1248, 1191, 816, 774; <sup>1</sup>H NMR (400 MHz, Benzene-*d*<sub>6</sub>)  $\delta$  8.16 (d, *J* = 8.4 Hz, 1H), 7.64 (d, *J* = 8.1 Hz, 1H), 7.52 (dd, *J* = 8.3, 1.3 Hz, 1H), 7.37 (ddt, *J* = 8.3, 6.8, 1.2 Hz, 1H), 7.34 – 7.24 (m, 2H), 7.20 (ddd, *J* = 8.1, 6.9, 1.0 Hz, 1H), 7.05 – 6.94 (m, 2H), 6.33 – 6.23 (m, 2H), 5.80 (t, *J* = 3.9 Hz, 1H), 4.37 (d, *J* = 4.4 Hz, 1H), 3.54 (s, 1H), 2.11 – 1.89 (m, 3H), 1.78 – 1.58 (m, 2H), 1.46 (ddt, *J* = 12.7, 6.1, 3.2 Hz, 1H), 1.21 (d, *J* = 1.0 Hz, 9H); <sup>13</sup>C NMR (101 MHz, C<sub>6</sub>D<sub>6</sub>)  $\delta$  145.00, 140.43, 139.40, 138.12, 134.15, 132.39, 131.27, 128.62, 127.29, 125.76, 125.71, 125.45, 125.38, 125.22, 113.08, 51.74, 33.47, 31.40, 28.08, 25.43, 17.32; HRMS (ESI) *m/z* [M+H]<sup>+</sup>, calc'd for C<sub>26</sub>H<sub>29</sub>N 356.2373; found 356.2369.

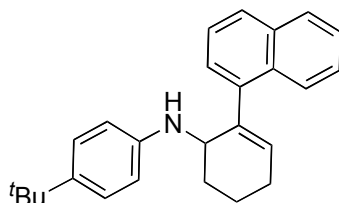

**N-(2-(benzo[d][1,3]dioxol-5-yl)cyclohex-2-enyl)-4-tert-butylaniline (5b):** Following **GP3** with **1a** (41 mg, 0.2 mmol) and 5-ethynylbenzo[*d*][1,3]dioxole (**2c**) (88 mg, 0.6 mmol), the product was isolated after a flash chromatography on silica gel (1: 30 EtOAc/hexanes) as brown oil (40 mg, 57%). IR  $\nu_{\max}$  (cm<sup>-1</sup>) 3406, 2926, 2857, 1724, 1610, 1516, 1238, 1037, 801; <sup>1</sup>H NMR (400 MHz, Chloroform-*d*)  $\delta$  7.24 – 7.18 (m, 2H), 6.97 (d, *J* = 1.8 Hz, 1H), 6.93 (dd, *J* = 8.1, 1.9 Hz, 1H), 6.72 (d, *J* = 8.2 Hz, 1H), 6.62 – 6.55 (m, 2H), 6.19 (dd, *J* = 4.9, 3.0 Hz, 1H), 5.92 (q, *J* = 1.5 Hz, 2H), 4.43 – 4.32 (m, 1H), 2.31 – 2.12 (m, 3H), 1.65 (tdd, *J* = 13.1, 6.4, 3.2 Hz, 3H), 1.29 (s, 9H); <sup>13</sup>C NMR (75 MHz, CDCl<sub>3</sub>)  $\delta$  147.89, 146.77, 144.73, 139.78, 137.16, 135.26, 128.04, 126.28, 119.31, 112.71, 108.32, 106.47, 101.10, 48.53, 34.04, 31.79, 27.44, 26.15, 17.16; HRMS (ESI) *m/z* [M+H]<sup>+</sup>, calc'd for C<sub>23</sub>H<sub>27</sub>NO<sub>2</sub> 350.2115; found 350.2121.

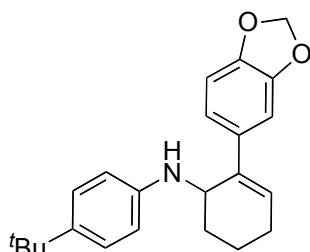

**N-(2-(naphthalen-1-yl)cyclohex-2-enyl)pyridin-2-amine (5c):** Following **GP3** of the annulation with **1j** (30 mg, 0.2 mmol) and 1-ethylnaphthalene (**2b**) (91 mg, 0.6 mmol), the product was isolated after a flash chromatography on silica gel (1: 5 EtOAc/hexanes) as yellow solid (43 mg, 72%). m.p. 99-102 °C; IR  $\nu_{\max}$  (cm<sup>-1</sup>) 3289, 3026, 2862, 2852, 1596, 1569, 1484, 1442, 1394, 1326, 1282, 799; <sup>1</sup>H NMR (400 MHz, Chloroform-*d*)  $\delta$  8.05 (dd, *J* = 7.9, 1.8 Hz, 1H), 7.95 (dd, *J* = 4.8, 2.1 Hz, 1H), 7.84 (dd, *J* = 7.7, 1.9 Hz, 1H), 7.77 – 7.70 (m, 1H), 7.57 – 7.44 (m, 2H), 7.43 – 7.32 (m, 2H), 7.21 (ddd, *J* = 8.7, 7.1, 1.9 Hz, 1H), 6.42 (dd, *J* = 7.1, 5.0 Hz, 1H), 6.13 (d, *J* = 8.4 Hz, 1H), 6.01 (dd, *J* = 4.5, 3.0 Hz, 1H), 4.72 (s, 2H), 2.44 – 2.25 (m, 2H), 2.21 – 2.02 (m, 2H), 1.97 – 1.81 (m, 2H); <sup>13</sup>C NMR (101 MHz, CD<sub>2</sub>Cl<sub>2</sub>)  $\delta$  157.82, 147.81, 140.23, 137.56, 136.87, 133.75, 132.13, 132.01, 128.29, 127.12, 125.85, 125.83, 125.55, 125.40, 125.16, 112.33, 106.92, 49.66, 28.85, 25.62, 17.80; HRMS (ESI) *m/z* [M+H]<sup>+</sup>, calc'd for C<sub>21</sub>H<sub>20</sub>N<sub>2</sub> 301.1700; found 301.1702.

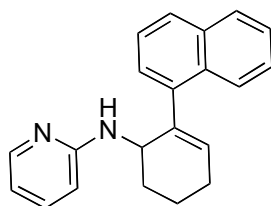

**Methyl 6-(biphenyl-2-ylamino)cyclohex-1-enecarboxylate (5d):** Following GP3 with **1f**

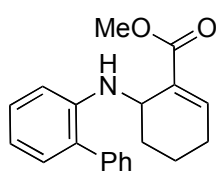

(45 mg, 0.2 mmol) and methyl propiolate (**2d**) (51 mg, 0.6 mmol), the product was isolated after a flash chromatography on silica gel (1: 10 EtOAc/hexanes) as colorless oil (26 mg, 42%). IR  $\nu_{\max}$  ( $\text{cm}^{-1}$ ) 3435, 3046, 2934, 2858, 1715, 1646, 1600, 1506, 1489, 1436, 1244, 1060, 753;  $^1\text{H NMR}$  (400 MHz, Chloroform-*d*)  $\delta$  7.50 – 7.32 (m, 5H), 7.32 – 7.24 (m, 1H), 7.08 (ddd,  $J = 12.5, 6.2, 2.2$  Hz, 2H), 6.98 (d,  $J = 8.1$  Hz, 1H), 6.80 (td,  $J = 7.4, 1.2$  Hz, 1H), 4.52 (d,  $J = 4.0$  Hz, 1H), 3.74 (s, 3H), 2.31 – 2.18 (m, 1H), 2.18 – 2.04 (m, 2H), 1.69 – 1.56 (m, 1H), 1.45 (dddd,  $J = 31.3, 13.4, 10.9, 4.8, 2.7$  Hz, 2H);  $^{13}\text{C NMR}$  (75 MHz,  $\text{CDCl}_3$ )  $\delta$  167.45, 144.11, 143.22, 139.74, 131.12, 130.58, 129.47, 129.06, 128.89, 128.54, 127.33, 117.40, 112.01, 51.98, 46.36, 27.18, 25.87, 16.46; HRMS (ESI)  $m/z$   $[\text{M}+\text{H}]^+$ , calc'd for  $\text{C}_{20}\text{H}_{21}\text{NO}_2$  308.1645; found 308.1641.

**4-tert-butyl-N-(2-(thiophen-3-yl)cyclohex-2-enyl)aniline (5e):** Following GP3 with **1a**

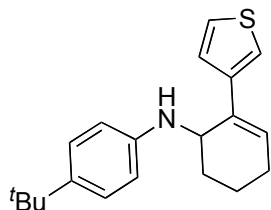

(41 mg, 0.2 mmol) and 3-ethynylthiophene (**2e**) (65 mg, 0.6 mmol), the product was isolated after a flash chromatography on silica gel (1: 30 EtOAc/hexanes) as yellow oil (41 mg, 66%). IR  $\nu_{\max}$  ( $\text{cm}^{-1}$ ) 3424, 3026, 2946, 2934, 2860, 1611, 1516, 1360, 1299, 1252, 1193, 818;  $^1\text{H NMR}$  (400 MHz, Chloroform-*d*)  $\delta$  7.17 – 7.11 (m, 4H), 7.09 (qd,  $J = 2.8, 1.2$  Hz, 1H), 6.57 – 6.43 (m, 2H), 6.27 (ddd,  $J = 4.6, 3.2, 1.6$  Hz, 1H), 4.27 (d,  $J = 3.3$  Hz, 1H), 3.70 (s, 1H), 2.26 – 2.03 (m, 3H), 1.74 – 1.45 (m, 3H), 1.22 (s, 9H);  $^{13}\text{C NMR}$  (101 MHz,  $\text{CDCl}_3$ )  $\delta$  144.85, 142.04, 139.83, 132.87, 127.64, 126.37, 125.46, 125.30, 119.51, 112.53, 48.97, 34.05, 31.80, 27.52, 25.91, 17.21; HRMS (ESI)  $m/z$   $[\text{M}+\text{H}]^+$ , calc'd for  $\text{C}_{20}\text{H}_{25}\text{NS}$  312.1780; found 312.1790.

**4-tert-butyl-N-(3-methyl-2-phenylcyclohex-2-enyl)aniline (5f):** Following GP3 with **1a**

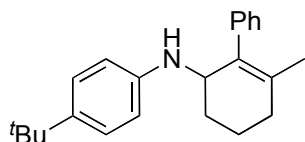

(41 mg, 0.2 mmol) and prop-1-ynylbenzene (**2f**) (70 mg, 0.6 mmol), the product was isolated after a flash chromatography on silica gel (1: 30 EtOAc/hexanes) as yellow oil (39 mg, 61%). IR  $\nu_{\max}$  ( $\text{cm}^{-1}$ ) 3415, 3031, 2950, 2864, 1613, 1517, 1470, 1441, 1301, 1259, 1193, 1033, 816;  $^1\text{H NMR}$  (300 MHz, Chloroform-*d*)  $\delta$  7.44 – 7.30 (m, 2H), 7.29 – 7.13 (m, 5H), 6.55 (d,  $J = 8.2$  Hz, 2H), 4.29 – 4.17 (m, 1H), 2.29 – 2.07 (m, 3H), 1.89 – 1.68 (m, 3H), 1.66 (s, 3H), 1.31 (d,  $J = 1.1$  Hz, 9H);  $^{13}\text{C NMR}$  (75 MHz,  $\text{CDCl}_3$ )  $\delta$  145.15, 142.22, 139.46, 134.57, 133.49, 129.11, 128.22, 126.55, 126.08, 112.75, 52.10, 33.95, 31.92, 31.74, 27.81, 21.31, 18.02; HRMS (ESI)  $m/z$   $[\text{M}+\text{H}]^+$ , calc'd for  $\text{C}_{23}\text{H}_{29}\text{N}$  320.2373; found 320.2374.

**N-(3-butyl-2-(3-(trifluoromethyl)phenyl)cyclohex-2-enyl)-3,5-dimethylaniline (5g):**

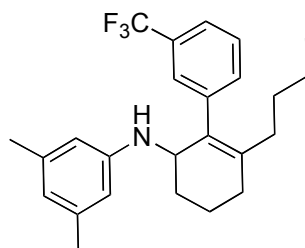

Following GP3 with **1h** (35 mg, 0.2 mmol) and 1-(hex-1-ynyl)-3-(trifluoromethyl)benzene (**2g**) (136 mg, 0.6 mmol), the product was isolated after a flash chromatography on silica gel (1: 20 EtOAc/hexanes) as yellow oil (34 mg, 42%). IR  $\nu_{\max}$  ( $\text{cm}^{-1}$ ) 3402, 3022, 2932, 2860, 1600, 1329, 1162, 1124, 1093, 1072;  $^1\text{H NMR}$  (300 MHz, Benzene-*d*<sub>6</sub>)  $\delta$  7.56 (s, 1H), 7.16 (s, 12H), 6.88 (t,  $J = 7.8$  Hz, 1H), 6.32 (s, 1H), 6.07 (s, 2H), 4.07

(d,  $J = 4.2$  Hz, 1H), 3.34 (s, 1H), 2.11 (s, 6H), 2.08 – 1.96 (m, 1H), 1.83 (ddt,  $J = 20.8, 7.4, 3.9$  Hz, 4H), 1.58 – 1.42 (m, 3H), 1.31 – 1.18 (m, 2H), 1.15 – 0.99 (m, 2H), 0.75 (dd,  $J = 7.9, 6.4$  Hz, 3H);  $^{13}\text{C}$  NMR (75 MHz,  $\text{CD}_2\text{Cl}_2$ )  $\delta$  147.74, 143.93, 140.36, 139.19, 133.22, 133.03, 130.41 (q,  $J^2 = 31.8$  Hz), 128.96, 126.31 (q,  $J^3 = 3.8$  Hz), 124.96 (q,  $J^1 = 272.3$  Hz), 123.57 (q,  $J^3 = 3.8$  Hz), 119.35, 111.44, 52.64, 34.52, 31.11, 29.41, 28.52, 23.05, 21.66, 18.51, 14.14; HRMS (ESI)  $m/z$   $[\text{M}+\text{H}]^+$ , calc'd for  $\text{C}_{25}\text{H}_{30}\text{F}_3\text{N}$  402.2403; found 402.2399.

**Ethyl 2-phenyl-3-(4-(trifluoromethyl)phenylamino)cyclohex-1-enecarboxylate (5h):**

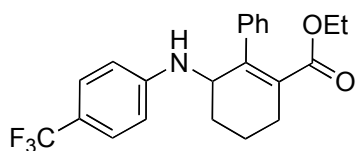

Following **GP3** with **1c** (43 mg, 0.2 mmol) and ethyl 3-phenylpropiolate (**2h**) (104 mg, 0.6 mmol), the product was isolated after a flash chromatography on silica gel (1: 10 EtOAc/hexanes) as yellow solid (72 mg, 92%). m.p. 145–148 °C; IR  $\nu_{\text{max}}$  ( $\text{cm}^{-1}$ ) 3396, 2938, 2921, 1700, 1612, 1529, 1318, 1266, 1109, 1063, 1052, 865;  $^1\text{H}$  NMR (300 MHz, Chloroform- $d$ )  $\delta$  7.38 – 7.30 (m, 2H), 7.25 (dtd,  $J = 7.9, 5.3, 3.5$  Hz, 5H), 6.60 – 6.47 (m, 2H), 4.40 (d,  $J = 3.1$  Hz, 1H), 3.92 (q,  $J = 7.1$  Hz, 2H), 2.73 – 2.55 (m, 1H), 2.44 – 2.25 (m, 1H), 2.18 – 2.02 (m, 1H), 1.90 – 1.64 (m, 3H), 0.86 (t,  $J = 7.2$  Hz, 3H);  $^{13}\text{C}$  NMR (75 MHz,  $\text{CDCl}_3$ )  $\delta$  170.01, 149.28, 141.67, 140.35, 133.28, 128.22, 127.70, 127.41, 126.74 (q,  $J^3 = 3.8$  Hz), 125.05 (q,  $J^1 = 270.3$  Hz), 118.9 (q,  $J^2 = 32.6$  Hz), 112.06, 60.61, 51.29, 27.41, 26.93, 17.03, 13.52; HRMS (ESI)  $m/z$   $[\text{M}+\text{H}]^+$ , calc'd for  $\text{C}_{22}\text{H}_{22}\text{F}_3\text{NO}_2$  390.1675; found 390.1682.

**Compounds in Table 4**

**(3a*S*,5*R*,7a*R*)-*N*,6-diphenyl-2,3,3*a*,4,5,7*a*-hexahydro-1*H*-inden-5-amine (7a)** (major isomer):

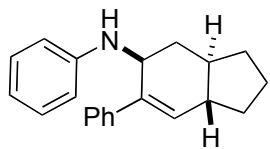

Following **GP3** with **6a** (38 mg, 0.2 mmol) and phenylacetylene (**2a**) (0.07 mL, 0.6 mmol), the product was isolated after a flash chromatography on silica gel (1: 30 EtOAc/hexanes) as colorless oil (51 mg, 88%). IR  $\nu_{\text{max}}$  ( $\text{cm}^{-1}$ ) 3392, 2934, 2864, 1599, 1502, 1247, 747;  $^1\text{H}$  NMR (400 MHz, Methylene Chloride- $d_2$ )  $\delta$  7.40 – 7.34 (m, 2H), 7.33 – 7.27 (m, 2H), 7.27 – 7.20 (m, 1H), 7.18 – 7.12 (m, 2H), 6.66 (tt,  $J = 7.3, 1.1$  Hz, 1H), 6.63 – 6.58 (m, 2H), 6.37 (t,  $J = 1.9$  Hz, 1H), 4.81 (dddd,  $J = 9.0, 6.9, 3.6, 2.0$  Hz, 1H), 2.82 (ddd,  $J = 12.4, 6.9, 2.5$  Hz, 1H), 2.11 (dddd,  $J = 12.3, 8.8, 7.0, 3.6, 1.9$  Hz, 1H), 2.00 (tt,  $J = 11.2, 5.9, 5.4, 2.8$  Hz, 1H), 1.91 – 1.71 (m, 3H), 1.61 (dddt,  $J = 14.5, 10.5, 6.1, 2.4$  Hz, 1H), 1.48 (td,  $J = 12.5, 9.3$  Hz, 1H), 1.39 – 1.24 (m, 2H);  $^{13}\text{C}$  NMR (101 MHz,  $\text{CD}_2\text{Cl}_2$ )  $\delta$  148.08, 141.33, 140.02, 132.84, 129.69, 128.55, 127.34, 126.94, 117.40, 113.52, 53.43, 46.00, 44.19, 36.93, 30.32, 30.23, 22.68; HRMS (ESI)  $m/z$   $[\text{M}+\text{H}]^+$ , calc'd for  $\text{C}_{21}\text{H}_{23}\text{N}$  290.1903; found 290.1908.

**7a** (major isomer) has also been obtained by following **GP3** with **6b** (38 mg, 0.2 mmol) and phenylacetylene (**2a**) (0.07 mL, 0.6 mmol), the product was isolated after a flash chromatography on silica gel (1: 30 EtOAc/hexanes) as colorless oil (52 mg, 90%).

**(3a*S*,5*R*,7a*R*)-6-(4-*tert*-butylphenyl)-*N*-(3-(trifluoromethyl)phenyl)-2,3,3*a*,4,5,7*a*-hexahydro-1*H*-inden-5-amine (7b)** (major isomer):

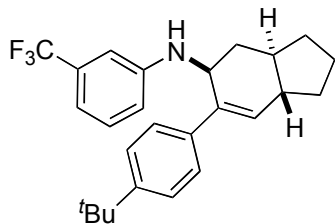

Following **GP3** with **6c** (51 mg, 0.2 mmol) and 1-*tert*-



butyl-4-ethynylbenzene (**2i**) (95 mg, 0.6 mmol), the product was isolated after a flash chromatography on silica gel (1: 40 EtOAc/hexanes) as colorless oil (70 mg, 85%). IR  $\nu_{\max}$  ( $\text{cm}^{-1}$ ) 3407, 2953, 2866, 1612, 1593, 1341, 1119, 832;  $^1\text{H}$  NMR (400 MHz, Methylene Chloride- $d_2$ )  $\delta$  7.23 – 7.11 (m, 5H), 6.84 – 6.74 (m, 1H), 6.73 – 6.70 (m, 1H), 6.67 – 6.62 (m, 1H), 6.25 (t,  $J = 1.9$  Hz, 1H), 4.71 (s, 1H), 3.79 (s, 1H), 2.69 (ddd,  $J = 12.4, 6.9, 2.4$  Hz, 1H), 1.98 (dddd,  $J = 12.2, 10.4, 7.0, 3.4, 1.9$  Hz, 1H), 1.91 – 1.84 (m, 1H), 1.77 – 1.60 (m, 3H), 1.53 – 1.42 (m, 2H), 1.41 – 1.31 (m, 1H), 1.20 (d,  $J = 0.4$  Hz, 10H);  $^{13}\text{C}$  NMR (101 MHz,  $\text{CD}_2\text{Cl}_2$ )  $\delta$  149.96, 147.84, 138.53, 137.40, 132.11, 131.15 (q,  $J^2 = 31.5$  Hz), 129.60, 125.88, 125.00, 124.51 (q,  $J^1 = 272.3$  Hz), 116.10, 112.94, 108.88, 52.63, 45.36, 43.52, 36.02, 34.30, 31.00, 29.73, 29.68, 22.10; HRMS (ESI)  $m/z$   $[\text{M}+\text{H}]^+$ , calc'd for  $\text{C}_{26}\text{H}_{30}\text{F}_3\text{N}$  414.2403; found 414.2404.

Following **GP3** with **6a** (38 mg, 0.2 mmol) and ethyl 3-phenylpropiolate (**2h**) (104 mg, 0.6 mmol), the products (two isomers, **7c** and **7c'**) were isolated after a flash chromatography on silica gel (1: 30 EtOAc/hexanes).

**(3aR,6R,7aS)-ethyl 5-phenyl-6-(phenylamino)-2,3,3a,6,7,7a-hexahydro-1H-indene-4-carboxylate (7c)** major isomer, colorless oil (57 mg, 78%). IR  $\nu_{\max}$  ( $\text{cm}^{-1}$ ) 3364, 2947, 2877, 1712, 1600, 1499, 1307, 1157, 752;

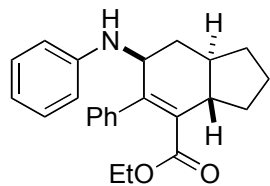

$^1\text{H}$  NMR (400 MHz, Chloroform- $d$ )  $\delta$  7.26 – 7.19 (m, 3H), 7.17 – 7.12 (m, 2H), 7.11 – 7.04 (m, 2H), 6.70 – 6.61 (m, 1H), 6.52 – 6.42 (m, 2H), 4.61 (ddd,  $J = 9.6, 6.9, 3.9$  Hz, 1H), 3.92 (qd,  $J = 7.1, 4.6$  Hz, 2H), 2.69 (ddd,  $J = 12.7, 6.8, 2.4$  Hz, 1H), 2.43 (dddd,  $J = 12.4, 10.8, 6.8, 3.9$  Hz, 1H), 2.00 (dtd,  $J = 11.4, 7.3, 3.5$  Hz, 1H), 1.86 (dddd,  $J = 11.5, 8.8, 5.5, 3.2$  Hz, 1H), 1.82 – 1.65 (m, 3H), 1.58 (td,  $J = 12.7, 9.9$  Hz, 1H), 1.40 – 1.21 (m, 3H), 0.90 (t,  $J = 7.1$  Hz, 3H);  $^{13}\text{C}$  NMR (101 MHz,  $\text{CDCl}_3$ )  $\delta$  169.31, 147.18, 142.69, 139.41, 135.55, 129.16, 128.15, 127.62, 127.50, 117.56, 113.65, 60.35, 56.35, 45.83, 43.22, 36.06, 29.98, 28.23, 21.88, 13.85; HRMS (ESI)  $m/z$   $[\text{M}+\text{H}]^+$ , calc'd for  $\text{C}_{24}\text{H}_{27}\text{NO}_2$  362.2115; found 362.2121.

**(3aR,6R,7aR)-ethyl 5-phenyl-6-(phenylamino)-2,3,3a,6,7,7a-hexahydro-1H-indene-4-carboxylate (7c')** minor isomer, colorless oil (14 mg, 20%). IR  $\nu_{\max}$  ( $\text{cm}^{-1}$ ) 3401, 2934, 2875, 1712, 1600, 1501, 1314, 1245, 747;

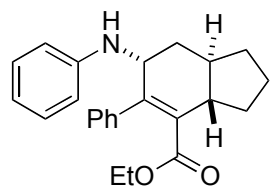

$^1\text{H}$  NMR (400 MHz, Methylene Chloride- $d_2$ )  $\delta$  7.37 – 7.31 (m, 2H), 7.31 – 7.24 (m, 2H), 7.16 – 7.08 (m, 2H), 6.65 (tt,  $J = 7.4, 1.1$  Hz, 1H), 6.57 – 6.50 (m, 2H), 4.44 (s, 1H), 4.06 – 3.85 (m, 3H), 2.28 (dt,  $J = 12.4, 1.6$  Hz, 1H), 2.19 (dddd,  $J = 13.2, 11.5, 6.3, 2.9$  Hz, 1H), 2.02 – 1.91 (m, 1H), 1.89 – 1.78 (m, 4H), 1.76 – 1.66 (m, 2H), 1.57 – 1.43 (m, 1H), 1.38 – 1.26 (m, 2H), 0.98 (t,  $J = 7.1$  Hz, 2H);  $^{13}\text{C}$  NMR (101 MHz,  $\text{CD}_2\text{Cl}_2$ )  $\delta$  169.32, 147.32, 141.06, 140.83, 137.04, 129.73, 128.57, 128.42, 127.90, 117.74, 113.35, 60.75, 54.62, 46.82, 39.56, 33.58, 29.67, 28.53, 23.01, 14.17; HRMS (ESI)  $m/z$   $[\text{M}+\text{H}]^+$ , calc'd for  $\text{C}_{24}\text{H}_{27}\text{NO}_2$  362.2115; found 362.2121.

Following **GP3** with **6d** (63 mg, 0.2 mmol) and ethyl 3-phenylpropiolate (**2h**) (104 mg, 0.6 mmol), the products (two isomers **7d** and **7d'**) were isolated after a flash chromatography on silica gel (1: 20 EtOAc/hexanes).

**(3aR,6R,7aS)-ethyl**

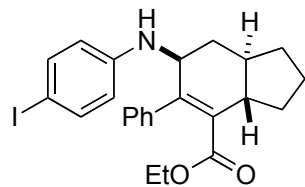

**6-(4-iodophenylamino)-5-phenyl-2,3,3a,6,7,7a-hexahydro-1H-indene-4-carboxylate (7d)** major isomer, colorless oil (70 mg, 71%). IR  $\nu_{\max}$  ( $\text{cm}^{-1}$ ) 3379, 2925, 2855, 1716, 1603, 1503, 1244, 1026, 750;  $^1\text{H}$  NMR (400 MHz, Methylene Chloride- $d_2$ )  $\delta$  7.35 – 7.26 (m, 2H), 7.26 – 7.17 (m, 3H), 7.17 – 7.07 (m, 2H), 6.30 – 6.19 (m, 2H), 4.59 (ddd,  $J = 10.3, 7.0, 3.9$  Hz, 1H), 3.98 – 3.82 (m, 2H), 2.60 (ddd,  $J = 12.7, 6.9, 2.5$  Hz, 1H), 2.38 (dddd,  $J = 12.3, 10.8, 6.9, 3.9$  Hz, 1H), 2.04 – 1.91 (m, 1H), 1.85 (dddd,  $J = 12.6, 8.2, 4.3, 2.5$  Hz, 1H), 1.74 (tddd,  $J = 16.4, 12.9, 7.7, 3.5$  Hz, 3H), 1.52 (td,  $J = 12.6, 9.9$  Hz, 1H), 1.35 – 1.22 (m, 3H), 0.92 (t,  $J = 7.1$  Hz, 3H);  $^{13}\text{C}$  NMR (101 MHz,  $\text{CD}_2\text{Cl}_2$ )  $\delta$  169.31, 147.45, 142.41, 140.02, 138.06, 136.25, 128.48, 128.01, 127.80, 115.87, 77.73, 60.67, 56.31, 46.18, 43.63, 36.06, 30.31, 28.65, 22.23, 14.14; HRMS (ESI)  $m/z$   $[\text{M}+\text{H}]^+$ , calc'd for  $\text{C}_{24}\text{H}_{26}\text{INO}_2$  488.1081; found 488.1084.

**(3aR,6R,7aR)-ethyl**

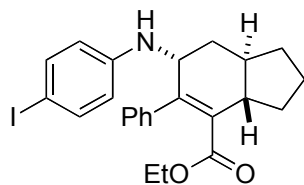

**6-(4-iodophenylamino)-5-phenyl-2,3,3a,6,7,7a-hexahydro-1H-indene-4-carboxylate (7d')** minor isomer, colorless oil (17 mg, 18%). IR  $\nu_{\max}$  ( $\text{cm}^{-1}$ ) 3412, 2926, 2863, 1694, 1582, 1483, 1308, 1231, 1170, 869;  $^1\text{H}$  NMR (400 MHz, Methylene Chloride- $d_2$ )  $\delta$  7.33 (dq,  $J = 9.3, 2.6, 2.1$  Hz, 2H), 7.30 – 7.17 (m, 5H), 6.34 – 6.27 (m, 2H), 4.39 – 4.29 (m, 1H), 4.03 (d,  $J = 8.4$  Hz, 1H), 3.90 (q,  $J = 7.1$  Hz, 2H), 2.21 (d,  $J = 1.5$  Hz, 2H), 1.96 – 1.86 (m, 1H), 1.84 – 1.74 (m, 3H), 1.63 (ddd,  $J = 11.8, 9.8, 5.6$  Hz, 2H), 1.51 – 1.38 (m, 1H), 1.33 – 1.24 (m, 1H), 0.93 (t,  $J = 7.1$  Hz, 3H);  $^{13}\text{C}$  NMR (101 MHz,  $\text{CD}_2\text{Cl}_2$ )  $\delta$  169.21, 146.96, 140.79, 140.32, 138.26, 137.29, 128.52, 128.49, 128.00, 115.61, 77.85, 60.79, 54.59, 46.76, 39.55, 33.51, 29.63, 28.48, 22.98, 14.16; HRMS (ESI)  $m/z$   $[\text{M}+\text{H}]^+$ , calc'd for  $\text{C}_{24}\text{H}_{26}\text{INO}_2$  488.1081; found 488.1092.

Following **GP3** with **6e** (40 mg, 0.2 mmol) and phenylacetylene (**2a**) (0.07 mL, 0.6 mmol), the products (two isomers, **7e** and **7e'**) were isolated after a flash chromatography on silica gel (1: 30 EtOAc/hexanes).

**(2S,4aR,8aR)-N,3-diphenyl-1,2,4a,5,6,7,8,8a-octahydronaphthalen-2-amine (7e)**

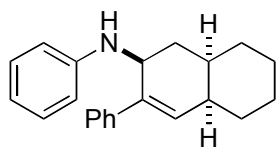

major isomer, colorless oil (49 mg, 80%). IR  $\nu_{\max}$  ( $\text{cm}^{-1}$ ) 3409, 2919, 2843, 1661, 1599, 1427, 1111, 1027, 743;  $^1\text{H}$  NMR (400 MHz, Methylene Chloride- $d_2$ )  $\delta$  7.33 – 7.28 (m, 2H), 7.28 – 7.22 (m, 2H), 7.21 – 7.16 (m, 1H), 7.14 – 7.05 (m, 2H), 6.61 (tt,  $J = 7.3, 1.1$  Hz, 1H), 6.57 – 6.51 (m, 2H), 5.90 (t,  $J = 1.9$  Hz, 1H), 4.72 (d,  $J = 7.1$  Hz, 1H), 3.45 (s, 1H), 2.46 – 2.35 (m, 1H), 1.90 (dddd,  $J = 11.2, 5.8, 3.8, 2.2$  Hz, 1H), 1.86 (tt,  $J = 3.3, 1.7$  Hz, 1H), 1.79 (dddd,  $J = 13.8, 11.0, 4.4, 2.9, 1.6$  Hz, 2H), 1.68 (dq,  $J = 15.3, 2.8$  Hz, 1H), 1.45 – 1.31 (m, 4H), 1.13 (tdq,  $J = 16.9, 8.9, 4.6, 4.0$  Hz, 2H);  $^{13}\text{C}$  NMR (101 MHz,  $\text{CD}_2\text{Cl}_2$ )  $\delta$  147.76, 140.41, 138.74, 134.97, 129.13, 127.92, 126.70, 126.44, 116.72, 112.83, 51.66, 42.90, 40.19, 38.41, 32.77, 32.76, 26.73, 26.39; HRMS (ESI)  $m/z$   $[\text{M}+\text{H}]^+$ , calc'd for  $\text{C}_{22}\text{H}_{25}\text{N}$  304.2060; found 304.2066.

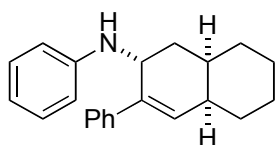

**(2R,4aR,8aR)-N,3-diphenyl-1,2,4a,5,6,7,8,8a-octahydronaphthalen-2-amine (7e')** minor isomer, colorless oil (9 mg, 14%). IR  $\nu_{\max}$  ( $\text{cm}^{-1}$ ) 3377, 2916, 2848, 1599, 1502, 1442, 1250, 1224, 747;  $^1\text{H}$  NMR (400 MHz, Methylene Chloride- $d_2$ )  $\delta$

7.45 – 7.40 (m, 2H), 7.30 – 7.24 (m, 2H), 7.22 – 7.17 (m, 1H), 7.16 – 7.10 (m, 2H), 6.63 (tt,  $J = 7.3, 1.1$  Hz, 1H), 6.61 – 6.56 (m, 2H), 6.17 – 6.08 (m, 1H), 4.52 (d,  $J = 4.5$  Hz, 1H), 3.82 (s, 1H), 2.01 (dt,  $J = 13.0, 2.0$  Hz, 1H), 1.88 (dtd,  $J = 12.9, 3.4, 1.7$  Hz, 1H), 1.82 – 1.76 (m, 3H), 1.63 – 1.57 (m, 1H), 1.52 – 1.45 (m, 1H), 1.37 (dddd,  $J = 24.3, 12.3, 6.2, 2.9$  Hz, 3H), 1.22 – 1.10 (m, 2H).  $^{13}\text{C}$  NMR (101 MHz,  $\text{CD}_2\text{Cl}_2$ )  $\delta$  147.64, 140.61, 136.91, 136.89, 134.74, 129.80, 128.86, 127.55, 126.21, 117.27, 113.01, 111.07, 48.98, 43.85, 36.01, 35.72, 33.40, 33.34, 27.51, 27.25; HRMS (ESI)  $m/z$   $[\text{M}+\text{H}]^+$ , calc'd for  $\text{C}_{22}\text{H}_{25}\text{N}$  304.2060; found 304.2061.

Following **GP3** with **6f** (40 mg, 0.2 mmol) and 5-ethynylbenzo[*d*][1,3]dioxole (**2c**) (88 mg, 0.6 mmol), the products (two isomers, **7f** and **7f'**) were isolated after a flash chromatography on silica gel (1: 30 EtOAc/hexanes).

**(2*S*,4*aR*,8*aR*)-3-(benzo[*d*][1,3]dioxol-5-yl)-*N*-phenyl-1,2,4*a*,5,6,7,8,8*a*-**

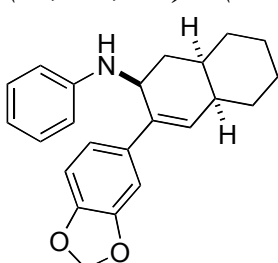

**octahydronaphthalen-2-amine (7f)** major isomer, colorless oil (51 mg, 73%). IR  $\nu_{\text{max}}$  ( $\text{cm}^{-1}$ ) 3407, 2917, 2856, 1600, 1435, 1245, 1039, 752;  $^1\text{H}$  NMR (400 MHz, Methylene Chloride- $d_2$ )  $\delta$  7.18 – 7.10 (m, 2H), 6.86 – 6.78 (m, 2H), 6.74 (d,  $J = 7.9$  Hz, 1H), 6.65 (tt,  $J = 7.3, 1.1$  Hz, 1H), 6.61 – 6.54 (m, 2H), 5.97 – 5.91 (m, 2H), 5.84 (t,  $J = 1.9$  Hz, 1H), 4.64 (dq,  $J = 9.9, 4.4, 3.3$  Hz, 1H), 3.50 (s, 1H), 2.47 – 2.37 (m, 1H), 1.96 – 1.89 (m, 1H), 1.87 (dt,  $J = 3.2, 1.6$  Hz, 1H), 1.86 – 1.78 (m, 2H), 1.73 – 1.66

(m, 1H), 1.47 – 1.33 (m, 4H), 1.21 – 1.06 (m, 2H);  $^{13}\text{C}$  NMR (101 MHz,  $\text{CD}_2\text{Cl}_2$ )  $\delta$  148.30, 147.97, 147.04, 138.94, 135.26, 134.70, 129.70, 120.37, 117.32, 113.45, 108.24, 107.57, 101.63, 52.45, 43.37, 40.71, 39.02, 33.36, 33.32, 27.30, 26.97; HRMS (ESI)  $m/z$   $[\text{M}+\text{H}]^+$ , calc'd for  $\text{C}_{23}\text{H}_{25}\text{NO}_2$  348.1958; found 348.1958.

**(2*R*,4*aR*,8*aR*)-3-(benzo[*d*][1,3]dioxol-5-yl)-*N*-phenyl-1,2,4*a*,5,6,7,8,8*a*-**

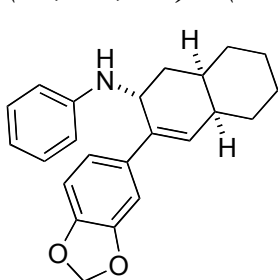

**octahydronaphthalen-2-amine (7f')** minor isomer, colorless oil (10 mg, 16%). IR  $\nu_{\text{max}}$  ( $\text{cm}^{-1}$ ) 3409, 3081, 2918, 2849, 1599, 1501, 1444, 1104, 1029, 745;  $^1\text{H}$  NMR (400 MHz, Methylene Chloride- $d_2$ )  $\delta$  7.20 – 7.07 (m, 2H), 6.98 – 6.85 (m, 2H), 6.71 (d,  $J = 8.1$  Hz, 1H), 6.63 (tt,  $J = 7.3, 1.1$  Hz, 1H), 6.59 (m, 2H), 6.03 – 5.94 (m, 1H), 5.94 – 5.88 (m, 2H), 4.41 (s, 1H), 3.79 (s, 1H), 2.03 – 1.93 (m, 1H), 1.90 – 1.86 (m, 1H), 1.84 (dq,  $J = 4.8, 2.4, 1.9$  Hz, 1H), 1.81 – 1.75 (m, 2H), 1.63 – 1.56 (m, 1H), 1.52 –

1.42 (m, 1H), 1.39 – 1.27 (m, 3H), 1.14 (ddt,  $J = 15.6, 9.4, 3.5$  Hz, 2H);  $^{13}\text{C}$  NMR (101 MHz,  $\text{CD}_2\text{Cl}_2$ )  $\delta$  148.36, 147.63, 147.28, 136.65, 135.19, 133.84, 129.82, 119.71, 117.31, 113.03, 108.47, 106.78, 101.71, 49.40, 43.80, 36.00, 35.74, 33.37, 27.48, 27.25; HRMS (ESI)  $m/z$   $[\text{M}+\text{H}]^+$ , calc'd for  $\text{C}_{23}\text{H}_{25}\text{NO}_2$  348.1958; found 348.1954.

**Diastereomer Identification; key NOSEY signals**

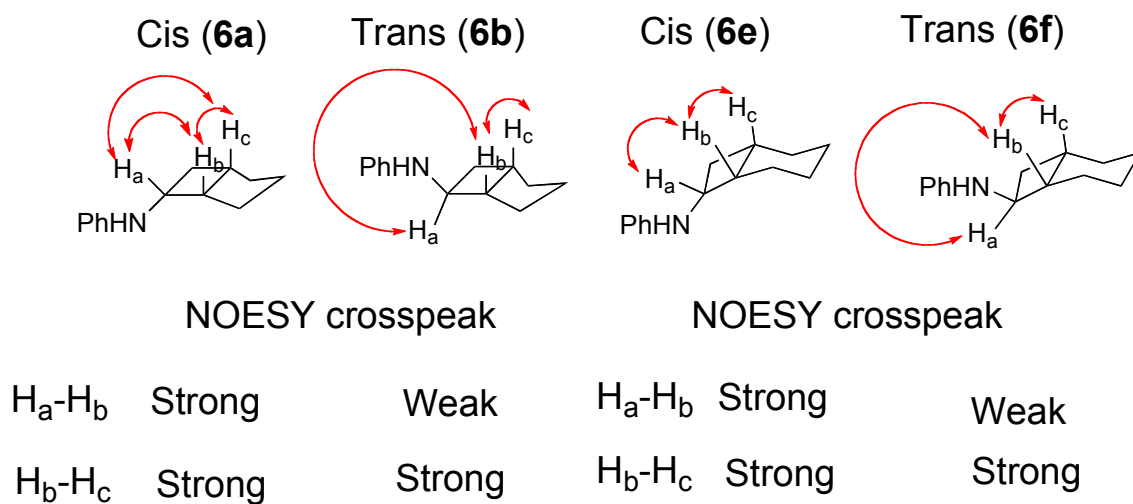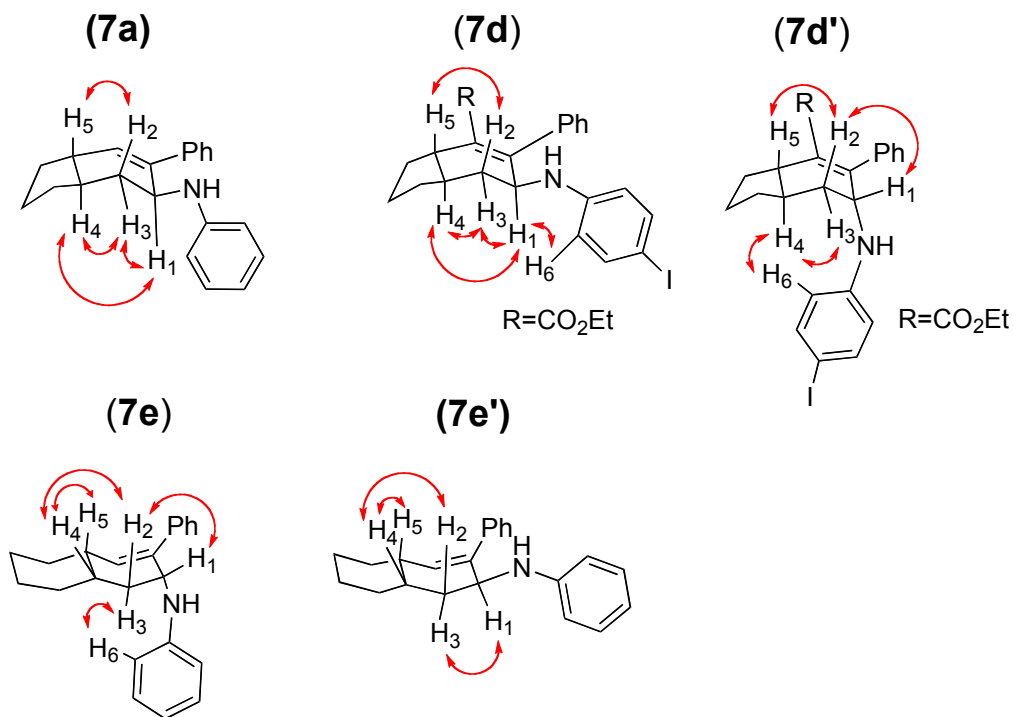

**Crystal data for (5h) and (7d):**

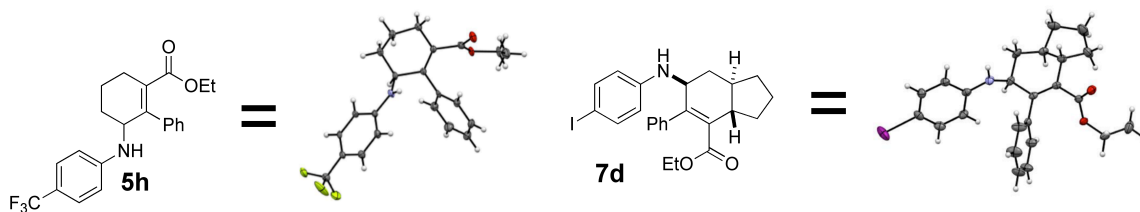

For the X-ray data collection, structure solution and Refinement:

The crystal was mounted on a glass fiber and transferred to a Bruker Kappa APEX II CCD diffractometer. The APEX2 software program<sup>5</sup> was used for determination of the unit cell parameters and data collection. The data were collected at 100 K using an Oxford Cryostream Plus system. The raw frame data were processed using APEX2 program. The absorption correction was applied using the program SADABS.<sup>6</sup> Subsequent calculations were carried out using the SHELXTL program.<sup>7</sup>

### 1, 4 Addition reaction of 4-fluoro-N-cyclobutylaniline (**1k**) to methyl propiolate (**2d**)

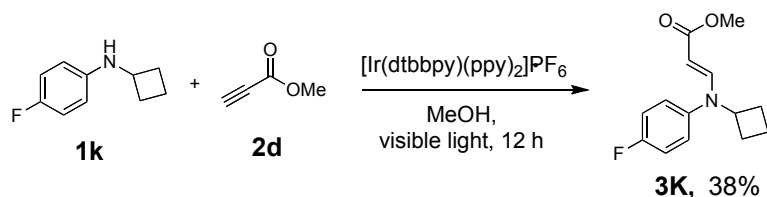

**(E)-methyl 3-(cyclobutyl(4-fluorophenyl)amino)acrylate (3k)**: Following **GP3** with **1k** (33 mg, 0.2 mmol) and methyl propiolate (**2d**) (51 mg, 0.6 mmol), the product was isolated after a flash chromatography on silica gel (1: 10 EtOAc/hexanes) as colorless oil (19 mg, 38%). IR  $\nu_{\text{max}}$  ( $\text{cm}^{-1}$ ) 3386, 2974, 2945, 1692, 1615, 1594, 1507, 1243, 1151, 800;  $^1\text{H}$  NMR (400 MHz, Chloroform-*d*)  $\delta$  7.65 (dd,  $J = 13.3, 0.5$  Hz, 1H), 7.14 – 6.97 (m, 4H), 4.56 (d,  $J = 13.3$  Hz, 1H), 4.23 – 4.02 (m, 1H), 2.36 – 2.17 (m, 2H), 2.04 – 1.87 (m, 2H), 1.72 – 1.57 (m, 2H);  $^{13}\text{C}$  NMR (75 MHz,  $\text{CDCl}_3$ )  $\delta$  170.00, 161.42 (d,  $^1J_{\text{CF}} = 246.8$  Hz), 149.92, 138.18, 128.98 (d,  $^3J_{\text{CF}} = 8.5$  Hz), 116.52 (d,  $^2J_{\text{CF}} = 22.7$  Hz), 88.12, 56.86, 50.86, 29.46, 14.51; FTMS (ESI)  $m/z$   $[\text{M}+\text{H}]^+$ , calc'd for  $\text{C}_{14}\text{H}_{16}\text{FNO}_2$  250.1238; found 250.1237.

### Stern-Volmer Quenching study

Fluorescence quenching studies were conducted using a Photon Technology Fluorescence Spectrophotometer. In each experiment, a solution of  $5.0 \times 10^{-4}$  M  $\text{Ir}(\text{ppy})_2(\text{dtbbpy})\text{PF}_6$  in MeOH was mixed with a MeOH solution of a quencher of various concentration in a screw-top 1.0 cm quartz cuvette. After degassing by sparging with argon for ten minutes, the resulting solution was irradiated at 460 nm, and fluorescence was measured at 575 nm. Plots were constructed according to the Stern-Volmer equation:  $I_0/I = 1 + k_q\tau_0[\text{Q}]$ .

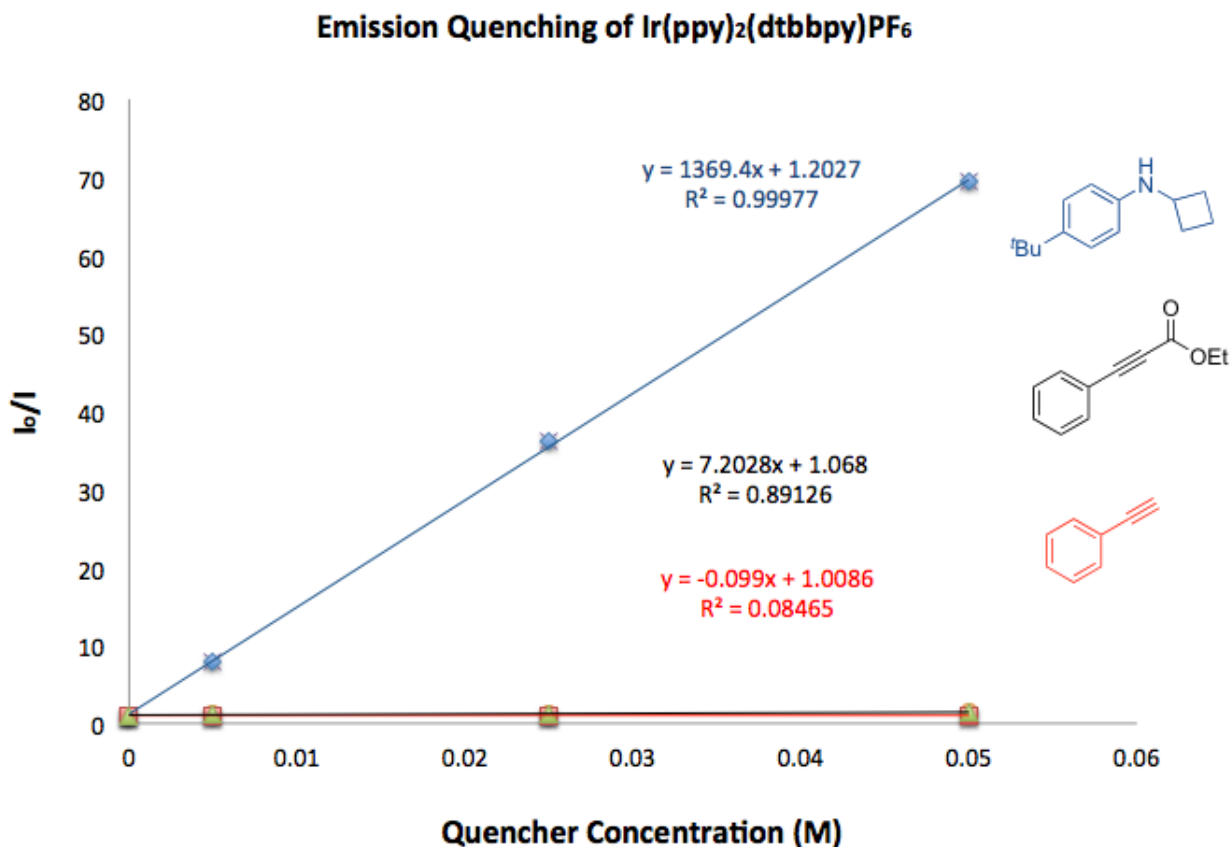

(Plots for two alkynes overlap.)

### Cyclic Voltammograms of **1a** and **3a**

Cyclic voltammograms were recorded on a CH Instruments-Electrochemical Analyzer using a three-electrode cell at room temperature under an argon atmosphere. The reference electrode was a saturated calomel electrode (SCE), which was separated from the solution by a bridge compartment filled with the same supporting electrolyte solution used in the cell. A platinum disc (2.0 mm diameter) was used as the working electrode and a platinum wire as the auxiliary electrode. Tetrabutylammonium hexafluorophosphate (0.1 M in CH<sub>3</sub>CN) was used as the supporting electrolyte. Voltammograms were taken in a solution of 4-*tert*-butyl-*N*-cyclobutylaniline (**1a**) in CH<sub>3</sub>CN ( $c \sim 2.10 \cdot 10^{-3} \text{ mol} \cdot \text{L}^{-1}$ ). The peak potentials for the irreversible oxidation of **1a** and **3a** were measured as 0.8 V vs. SCE and 1.14 V vs. SCE respectively.

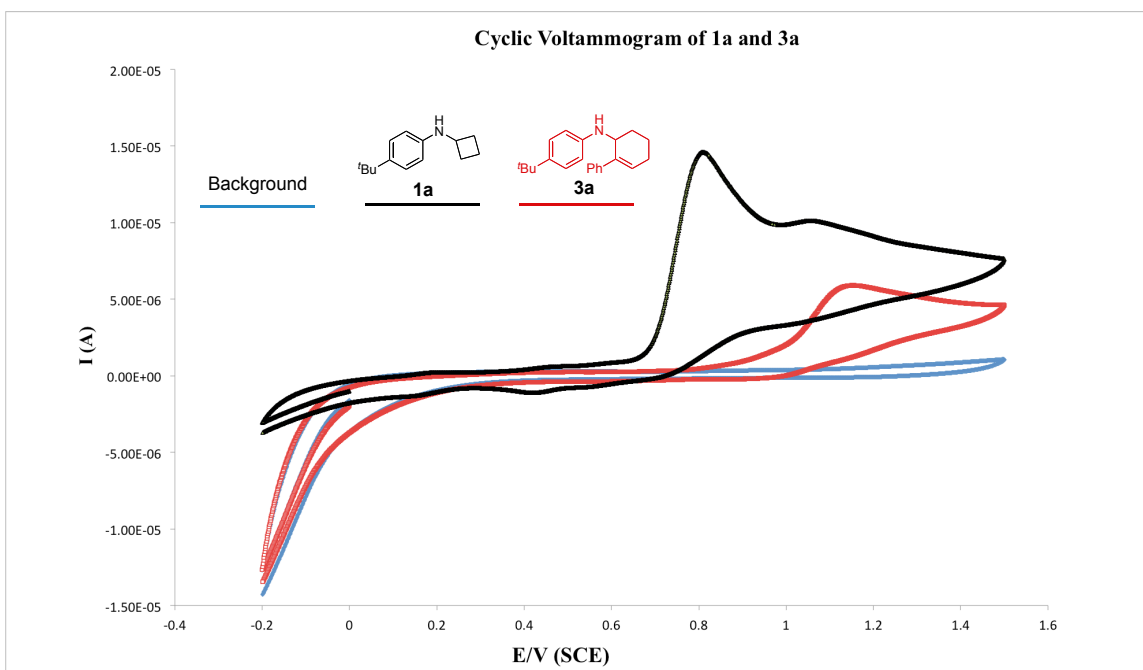

### Proposed catalytic cycle for the [4+2] annulation

A proposed catalytic cycle for the [4+2] annulation is shown in Scheme 2. Exposure of [Ir(dtbbpy)(ppy)<sub>2</sub>](PF<sub>6</sub>) **4a** to two white LEDs produces the photoexcited [Ir(dtbbpy)(ppy)<sub>2</sub>]<sup>1+</sup>\*, which is reductively quenched by cyclobutylaniline **8a** to generate [Ir(dtbbpy)(ppy)<sub>2</sub>] with the concomitant formation of amine radical cation **8b**. Subsequent ring opening generates distonic radical iminium ion **8c**, which undergoes intermolecular addition to phenylacetylene **2a** to yield vinyl radical **8d**. Intramolecular addition of the vinyl radical to the iminium ion in **8d** closes the six-membered ring and produces amine radical cation **8e**. Finally, reduction of amine radical cation **8e** by [Ir(dtbbpy)(ppy)<sub>2</sub>] furnishes product **8f** and regenerates [Ir(dtbbpy)(ppy)<sub>2</sub>]<sup>1+</sup>, thus completing the catalytic cycle.

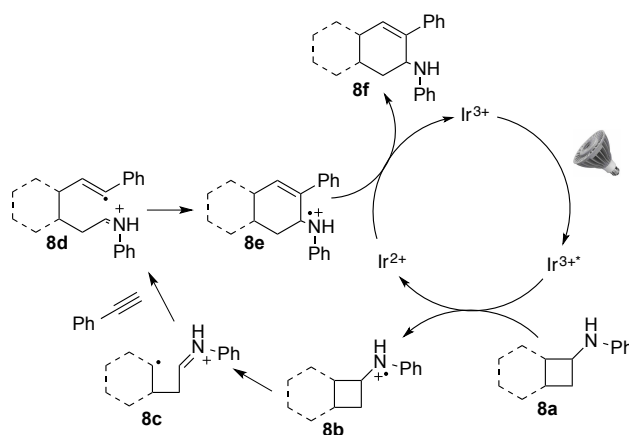

We have measured the oxidation peak potential of **1a** to be 0.8 V vs. SCE, which is more positive than the reduction potential of the photoexcited **4a** ( $\text{Ir}^{3+*}/\text{Ir}^{2+}$ : 0.66 V vs. SCE). Although thermodynamically unfavorable, such SET processes have been reported as long as there is overlap between the substrate's oxidation (or reduction) peak potential and the redox potential of the photocatalyst's excited state.<sup>[8]</sup> Furthermore, if the SET processes are subsequently coupled with an irreversible chemical reaction, they will more likely proceed to completion.<sup>[8]</sup> In our case, presumably the irreversible C-C bond cleavage drives the unfavorable ET process to completion. Stern-Volmer quenching studies revealed that cyclobutylaniline **1a** quenches the photoexcited **4a** while alkynes **2a** and **2h** showed little quenching (see page 21 of SI).

#### References:

- [1] D. Ma, Q. Cai, H. Zhang, *Org. Lett.* **2003**, *5*, 2453-2455.
- [2] L. Ghosez, R. Montaigne, A. Roussel, H. Vanlierde, P. Mollet. *Tetrahedron*. **1971**, *27*, 615-633.
- [3] M. McLaughlin, M. Palucki, I. W. Davies, *Org. Lett.* **2006**, *8*, 3307-3310.
- [4] a) T. H. Nguyen, S. Maity, N. Zheng, *Beilstein J. Org. Chem.* **2014**, *10*, 975-980; b) S. Maity, M. Zhu, R. S. Shinabery, N. Zheng, *Angew. Chem.* **2012**, *124*, 226-230; *Angew. Chem. Int. Ed.* **2012**, *51*, 222-226.
- [5] APEX2 v2011.2-0, Bruker AXS, Inc., Madison, WI 2010.
- [6] Sheldrick, G. M. SADABS, Version 2.05, Bruker AXS, Inc.; Madison, WI 2001.
- [7] Sheldrick, G. M. SHELXTL, Version 6.12, Bruker AXS, Inc.; Madison, WI 2001.
- [8] a) Y. Yasu; T. Koike, M. Akita, *Adv. Synth. Catal.* **2012**, *354*, 3414-3420; b) D. N. Primer, I. Karakaya, J. C. Tellis, G. A. Molander, *J. Am. Chem. Soc.* **2015**, *137*, 2195-2198.



# NMR data

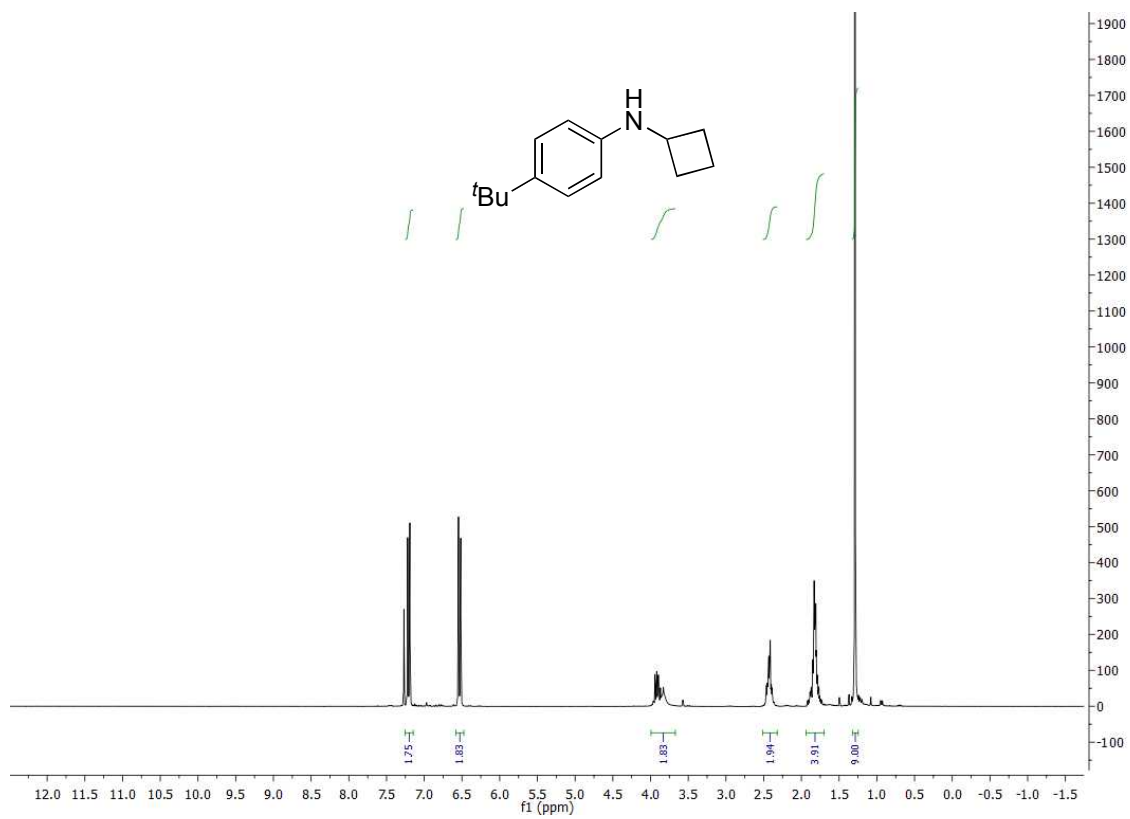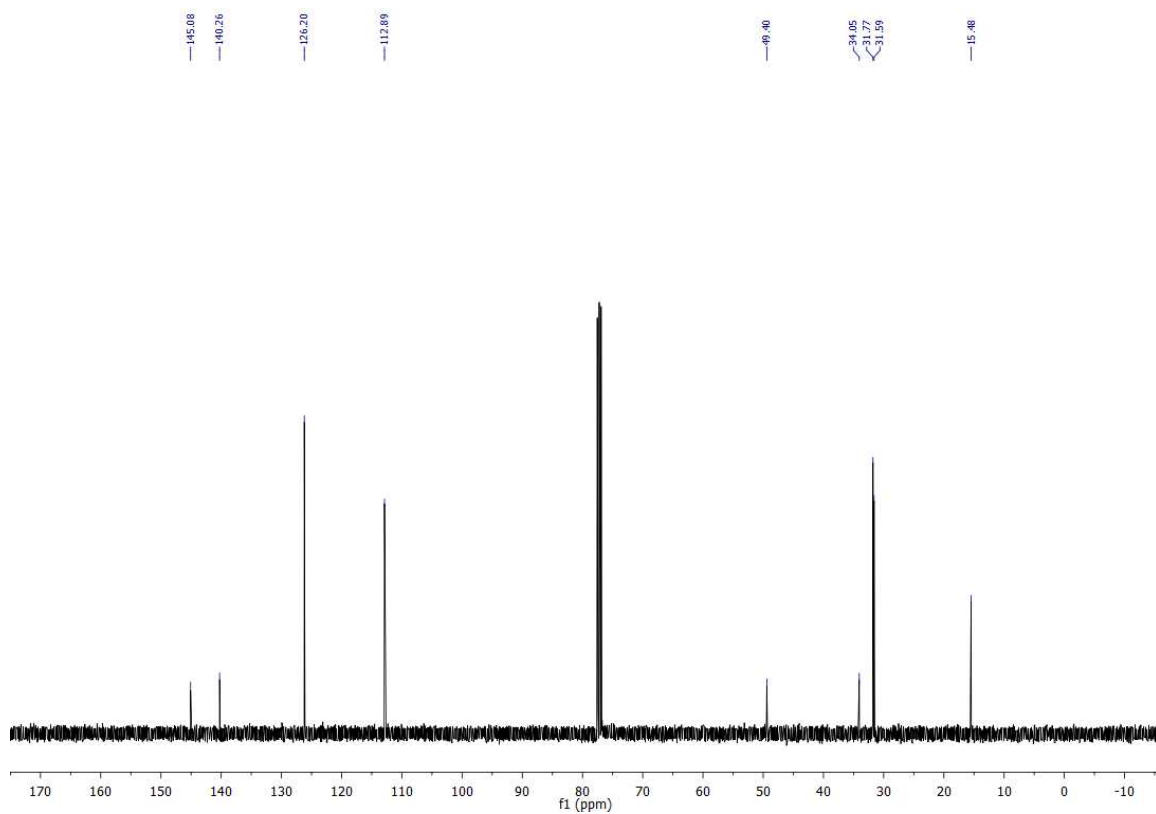

JW1210-2.3.fid  
JW1210-2 H1

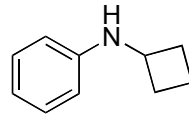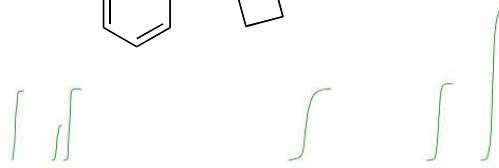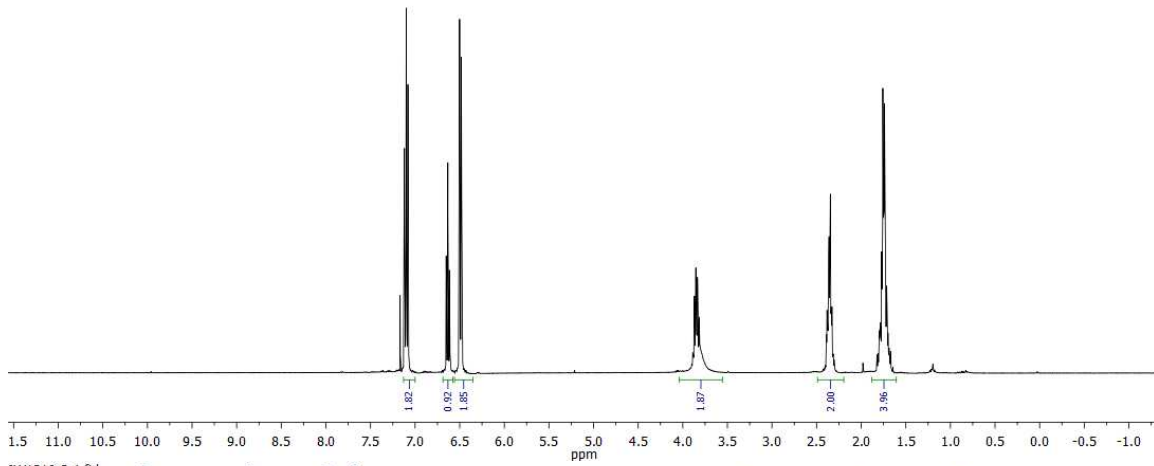

JW1210-2.4.fid  
JW1210-2 C13

147.19 129.27 117.40 113.06 49.04 31.28 15.30

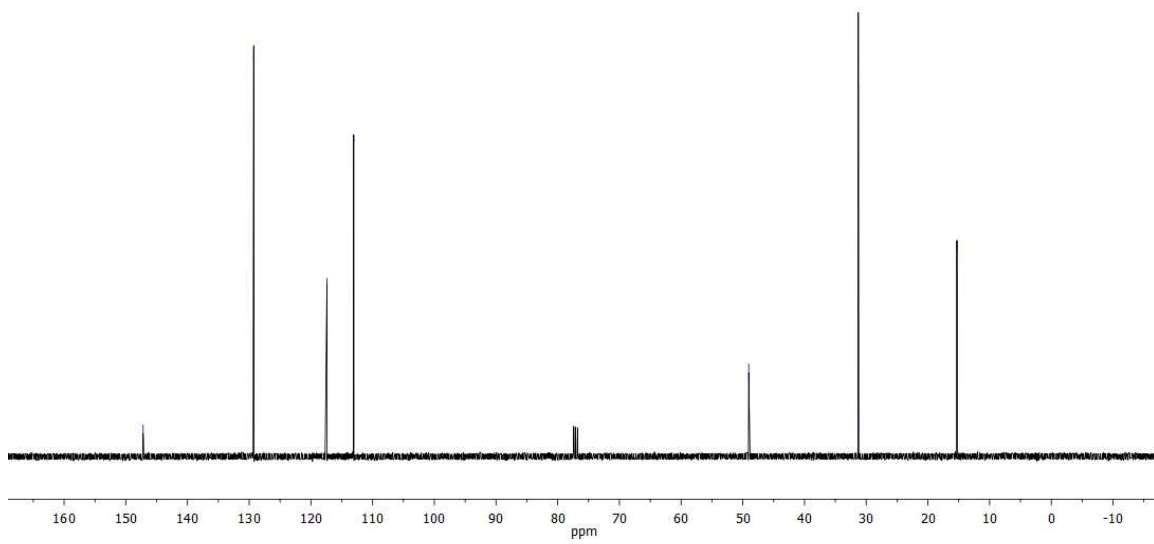

JW1181-1.2.fid  
JW1181-1

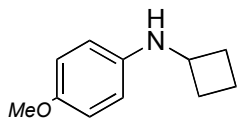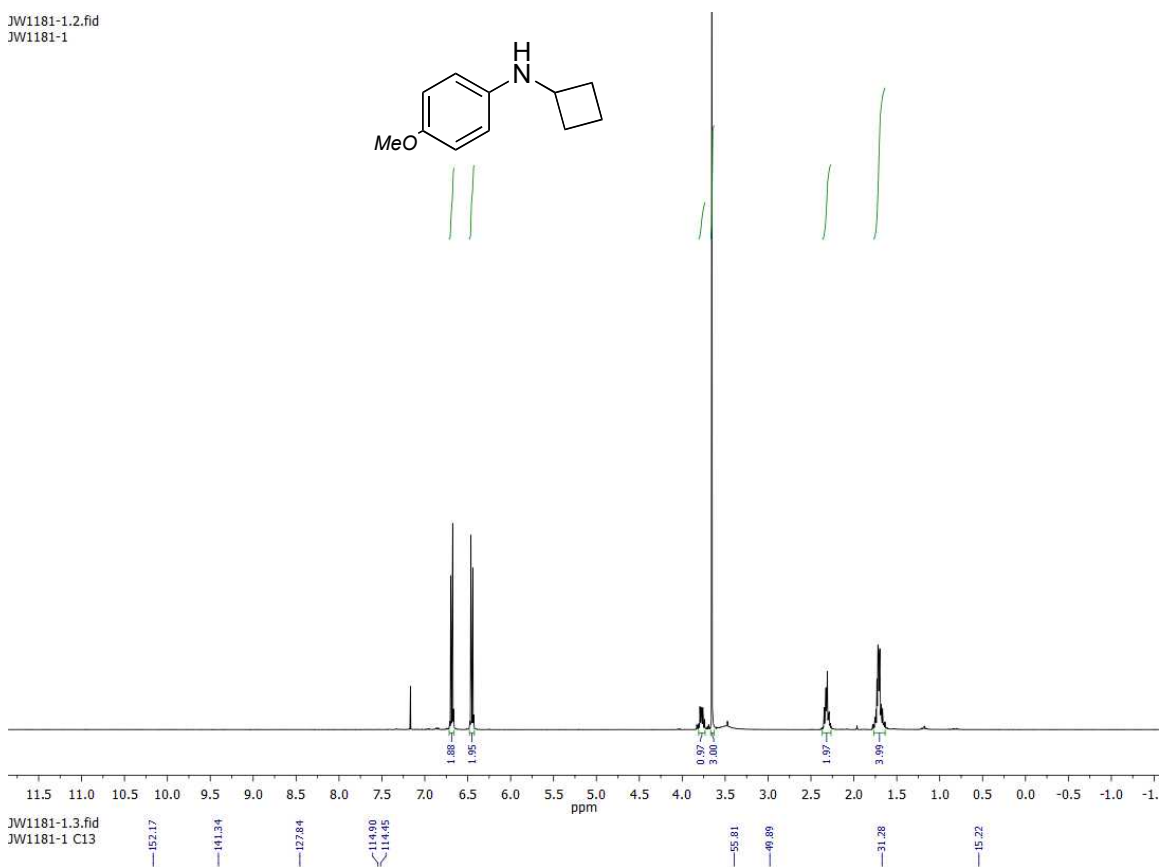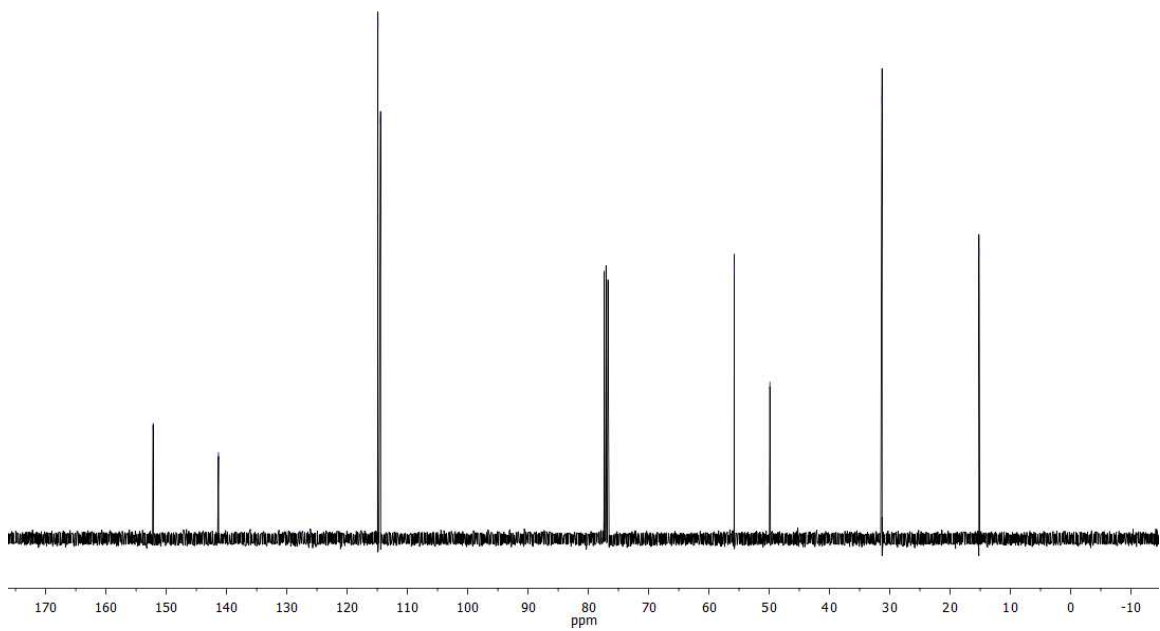

JW1220.1.fid  
JW1220 after column

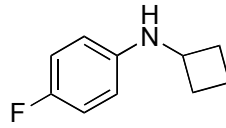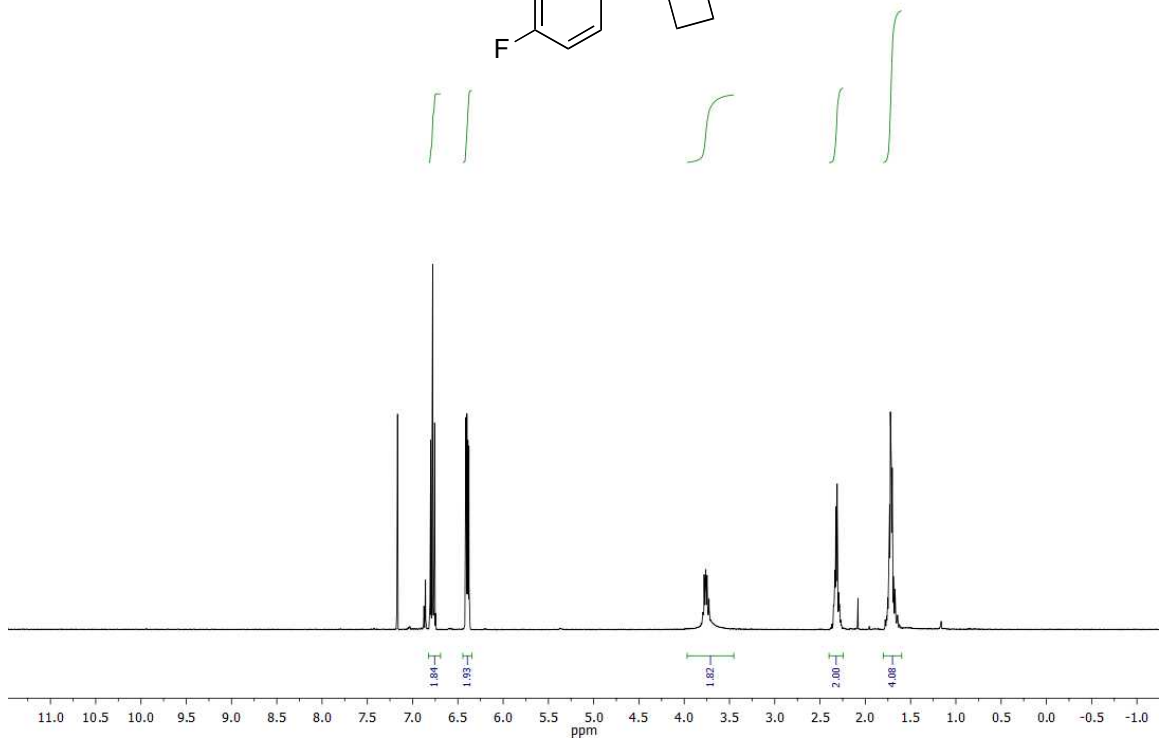

JW1220 C13.2.fid

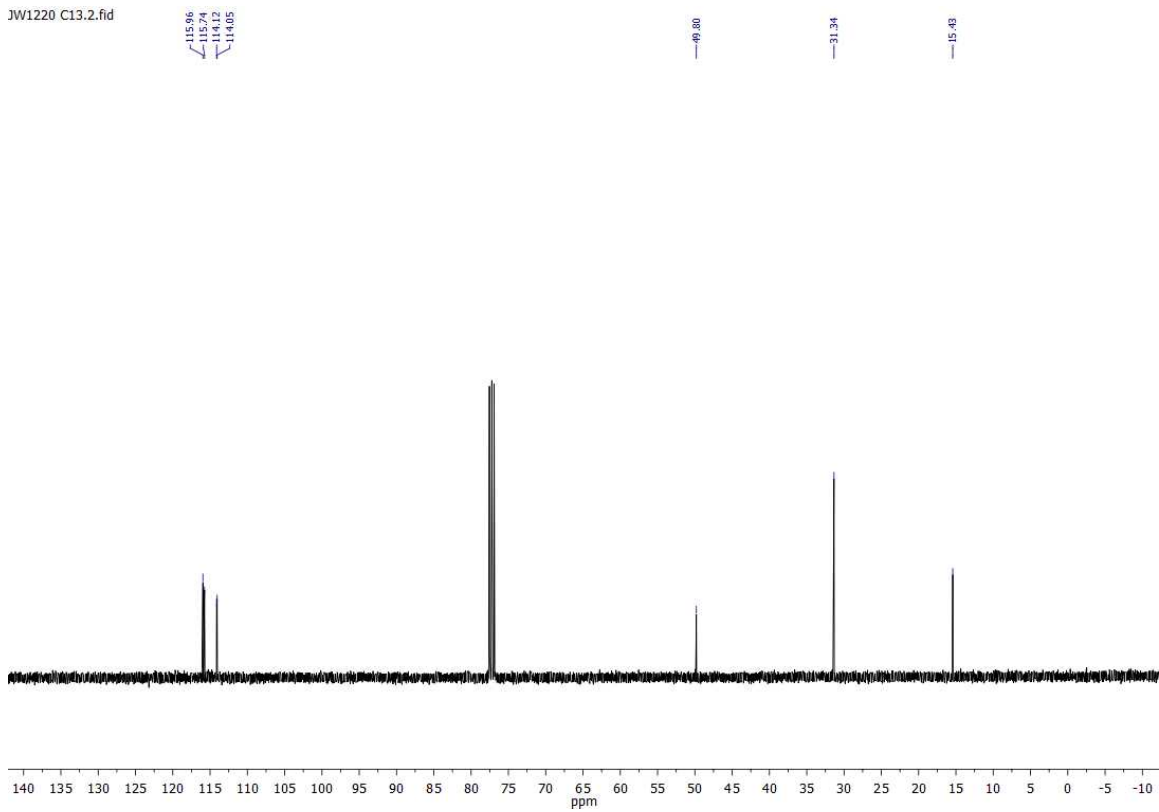

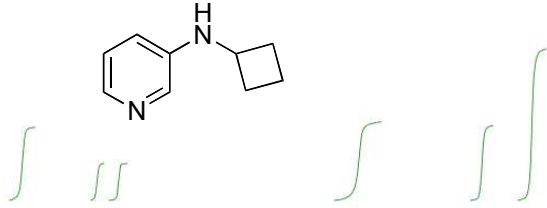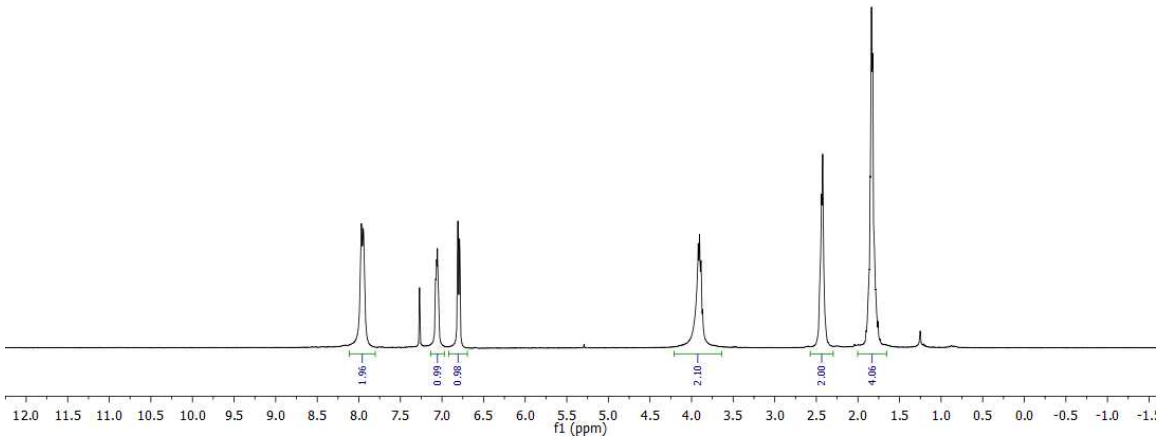

JW1098.2.fid  
JW1098\_C13

143.39  
136.19

123.93  
118.99

-68.79

-31.19

-15.39

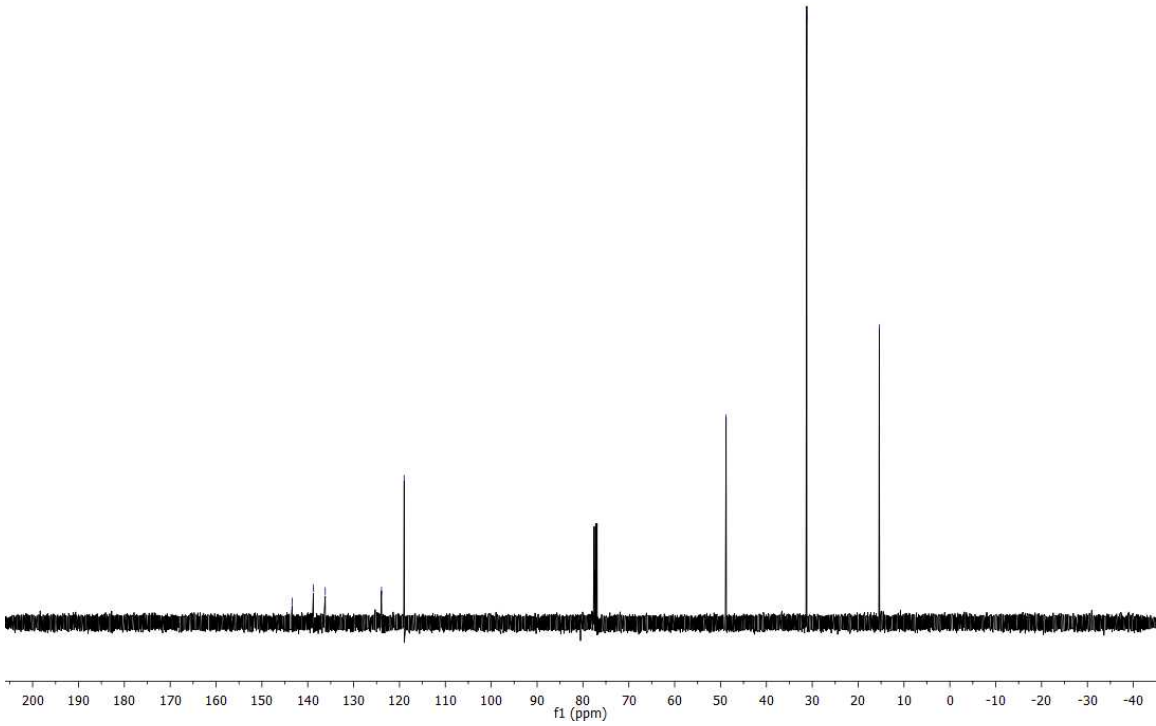

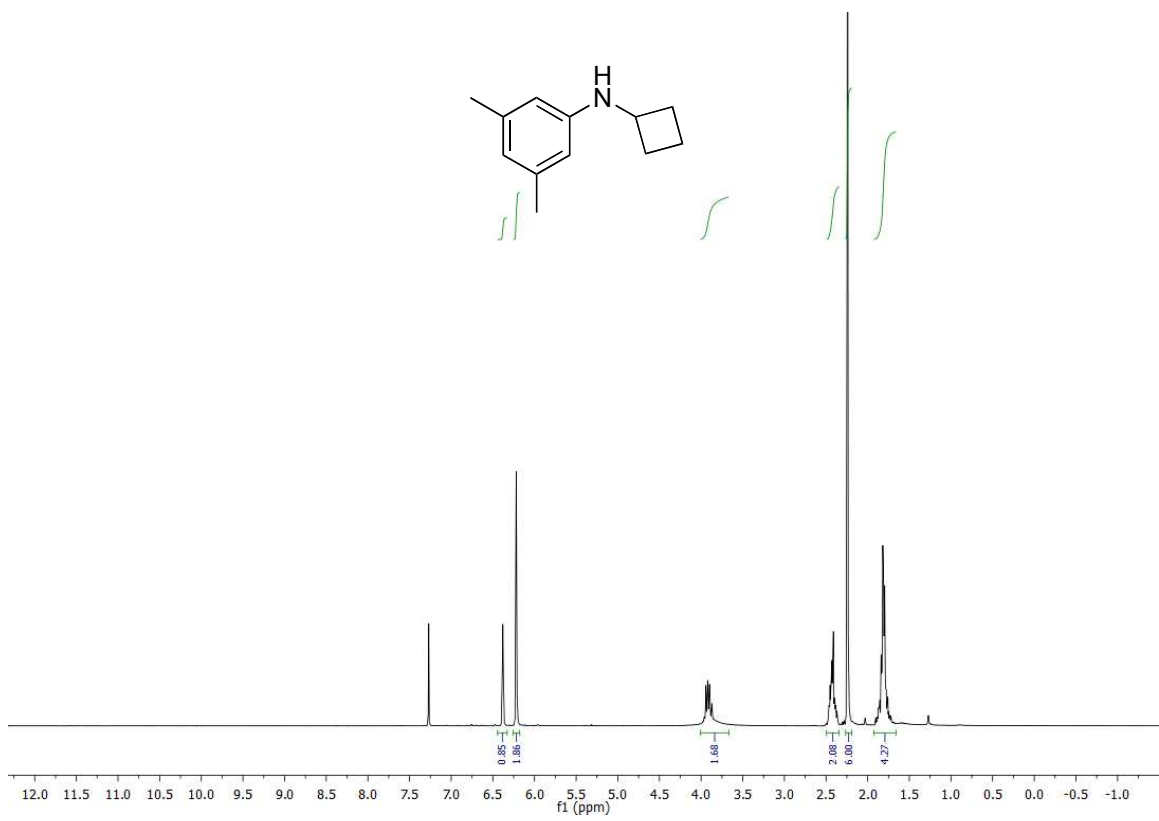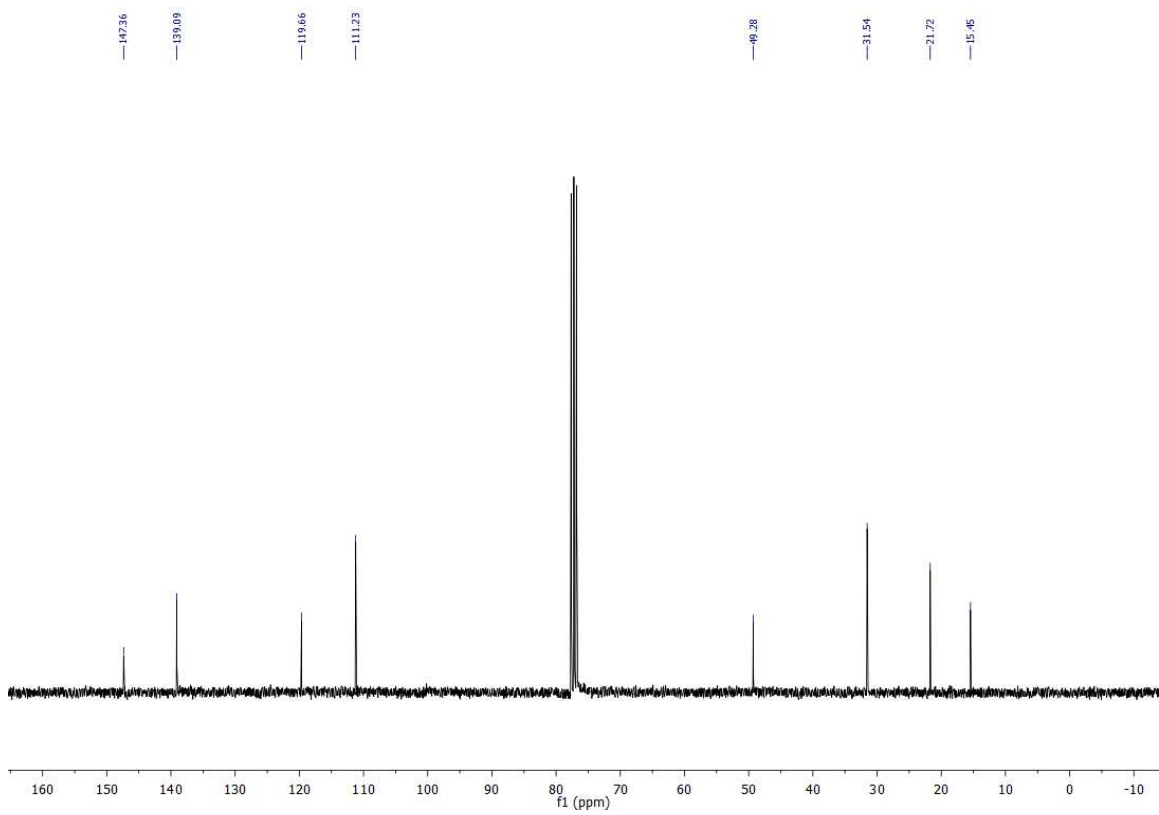

JW1232.1.fid  
JW1232 H1

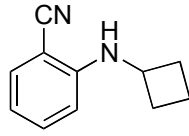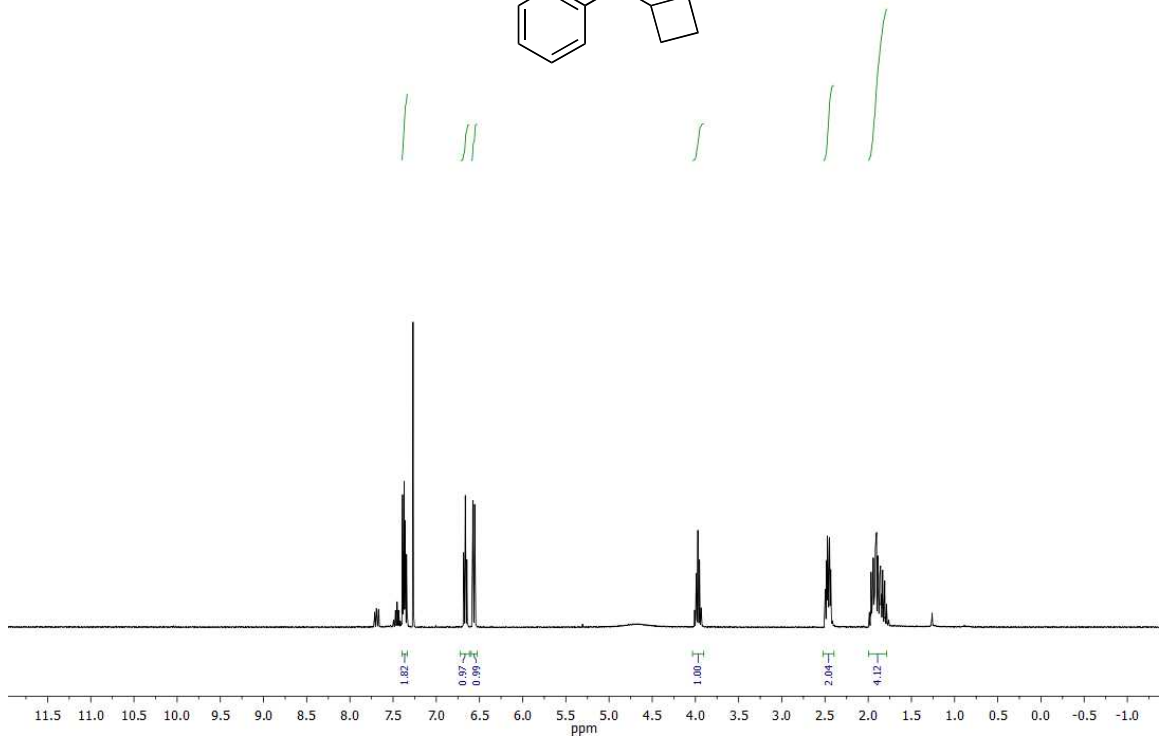

JW1232.3.fid

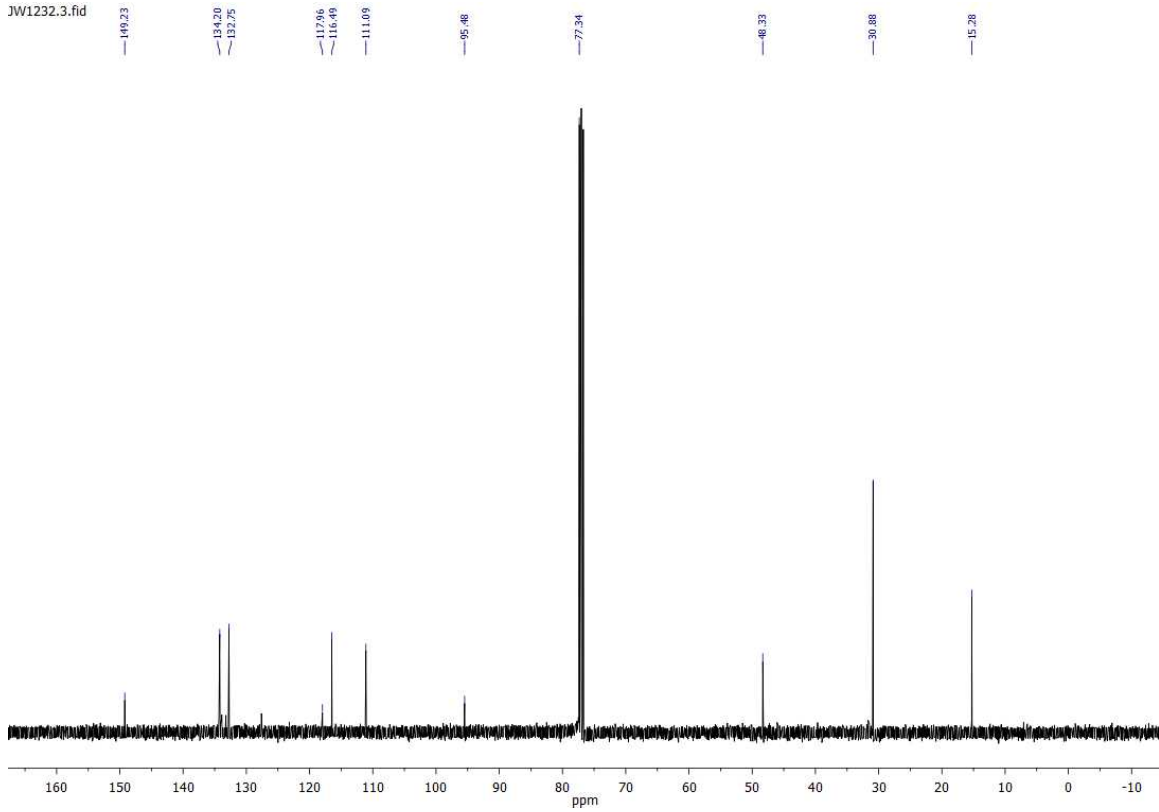

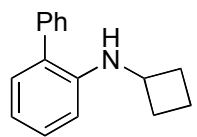

Handwritten annotations in green ink: "1H" and "13C" are written vertically on the left side of the spectrum, and "s" and "s" are written vertically on the right side.

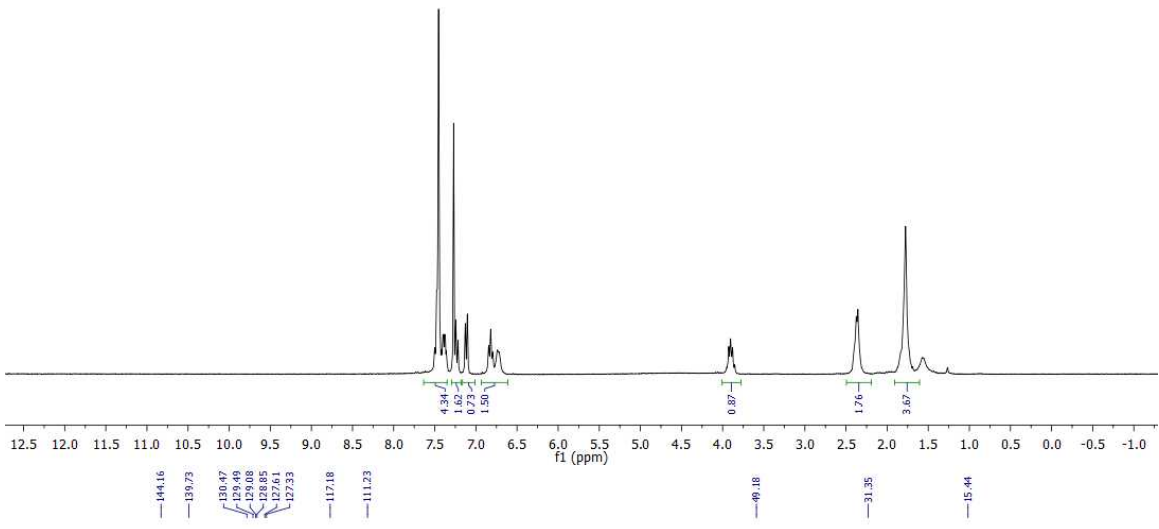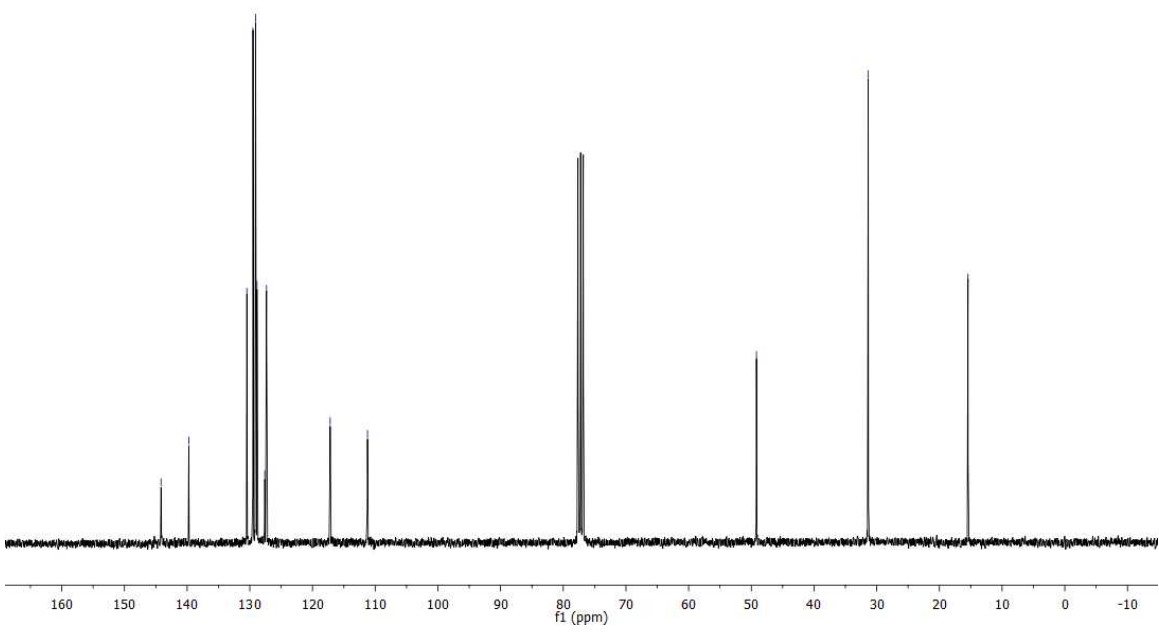



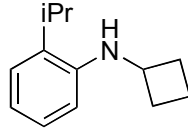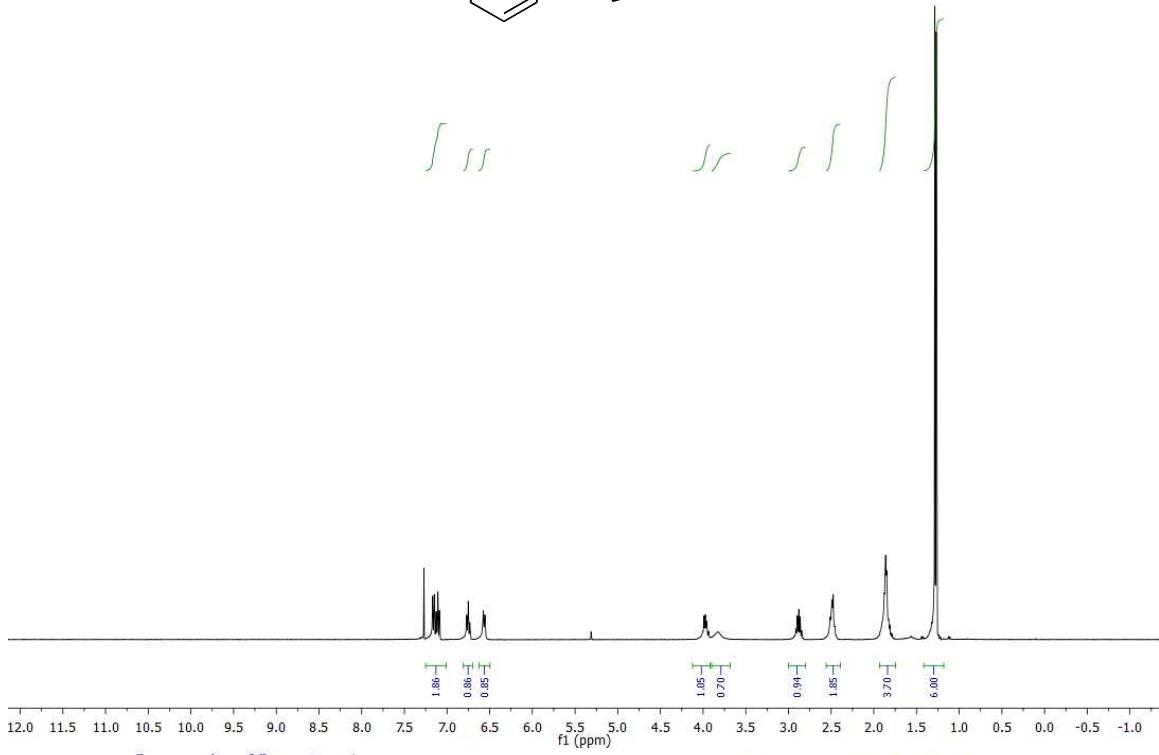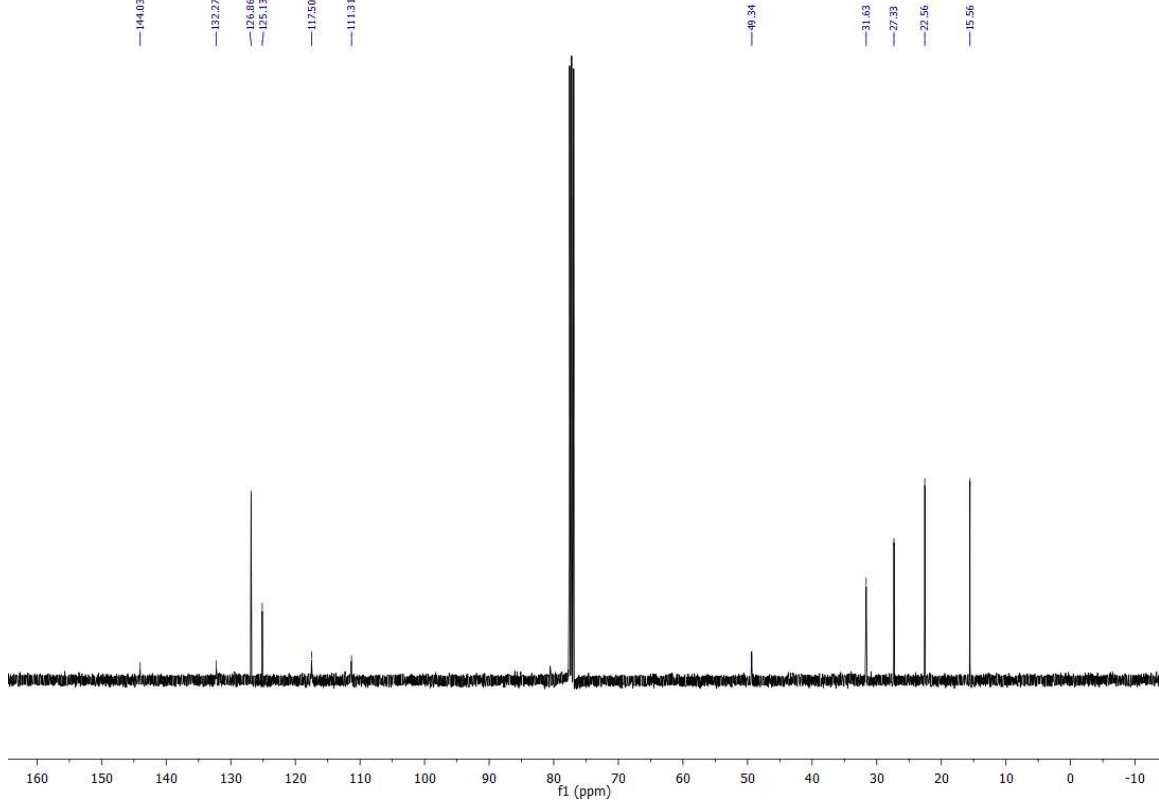

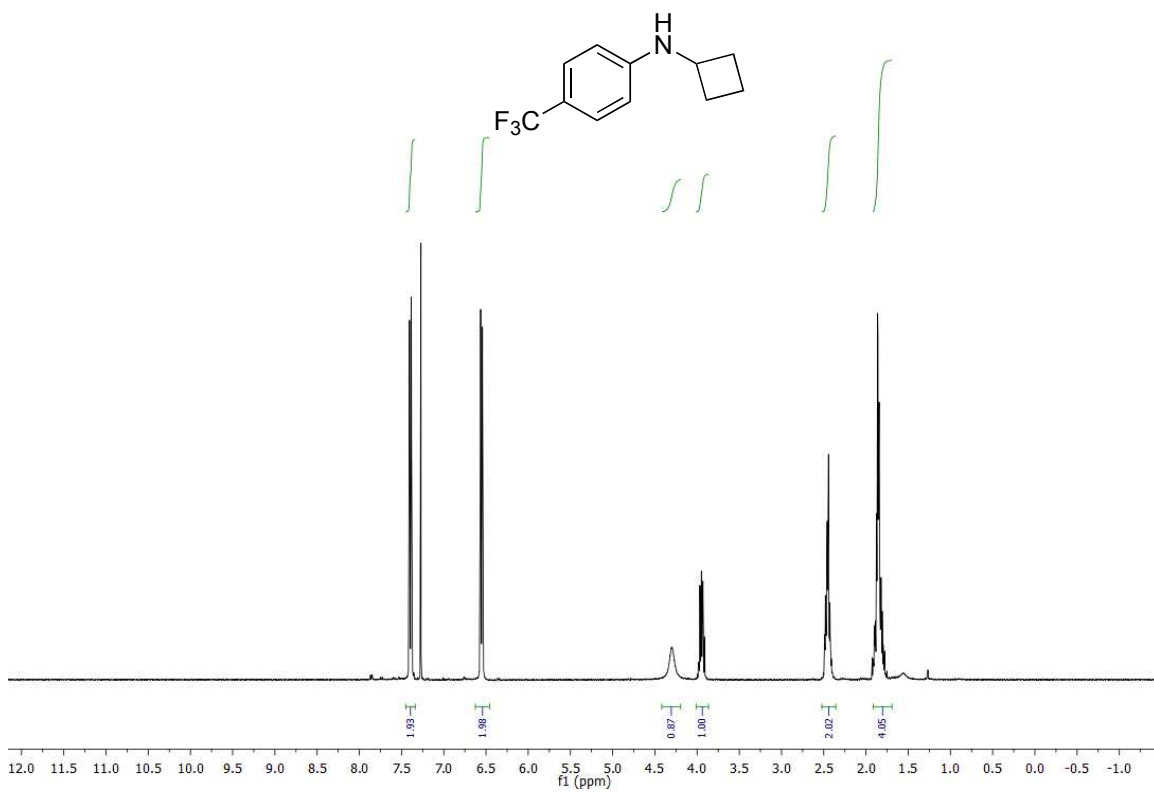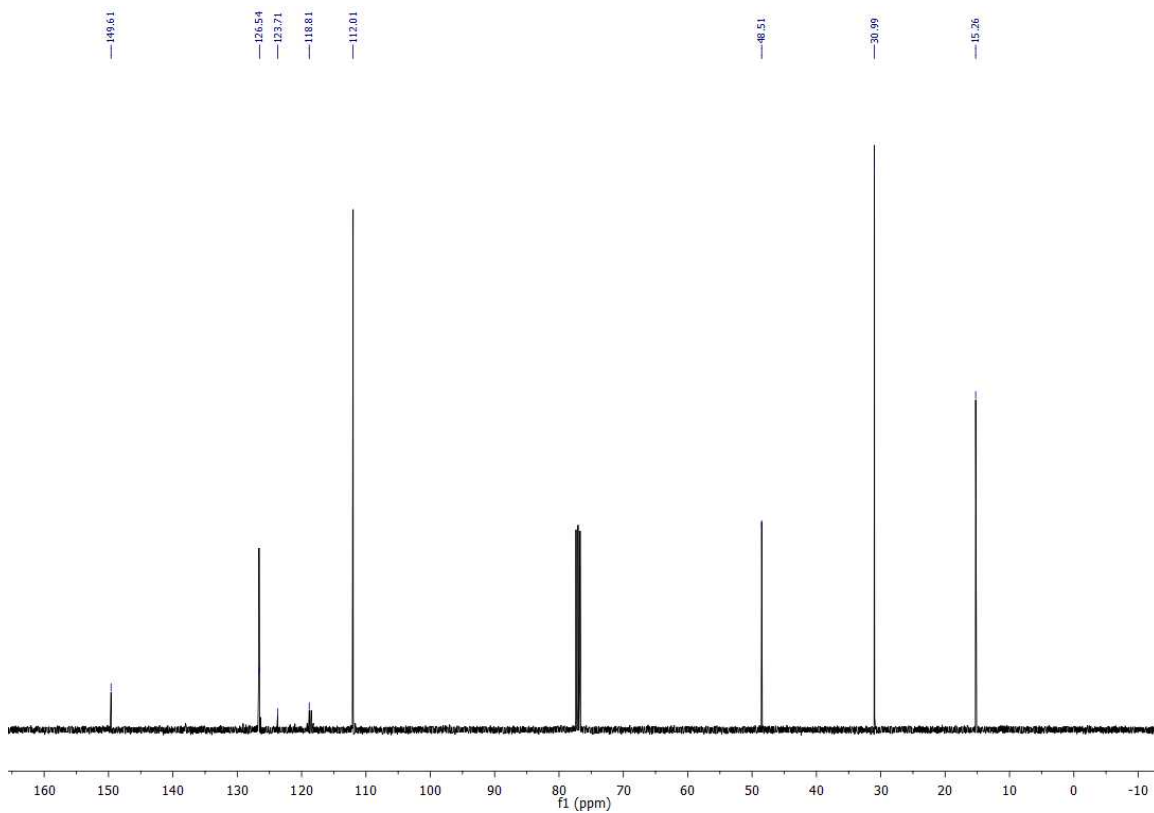

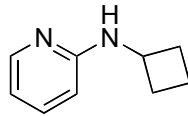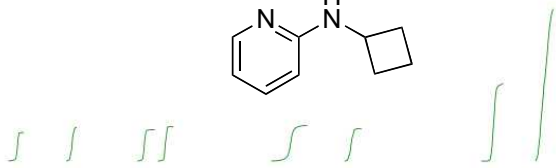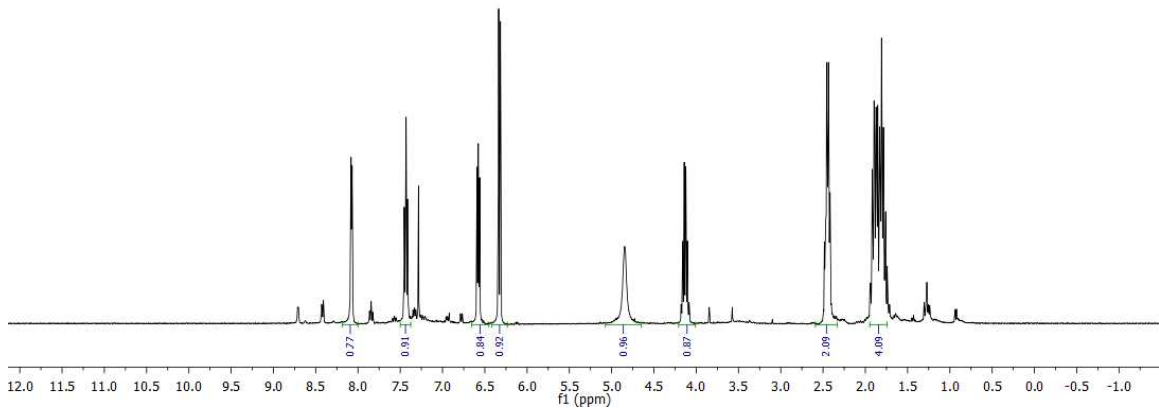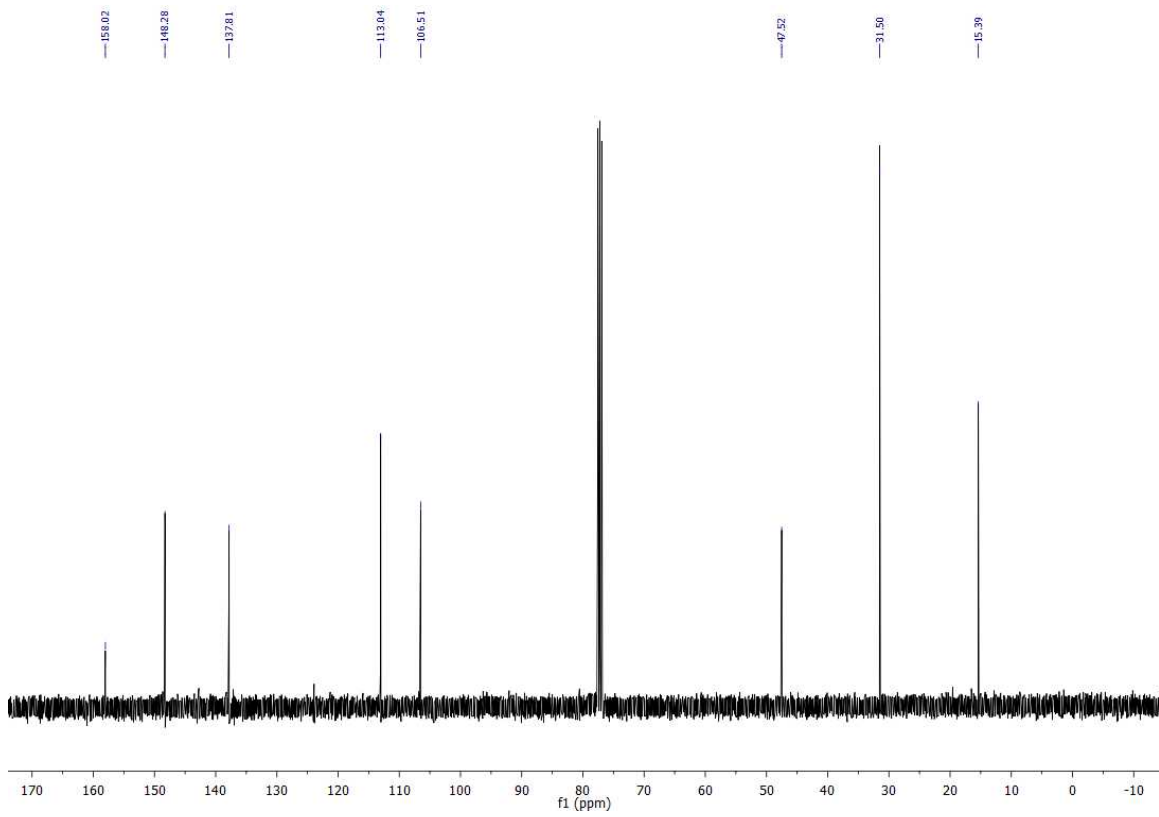

JW2018-F1.1.fid  
JW2018-F1

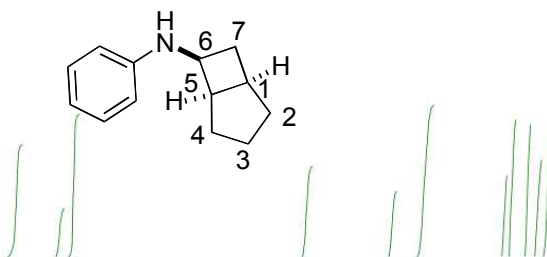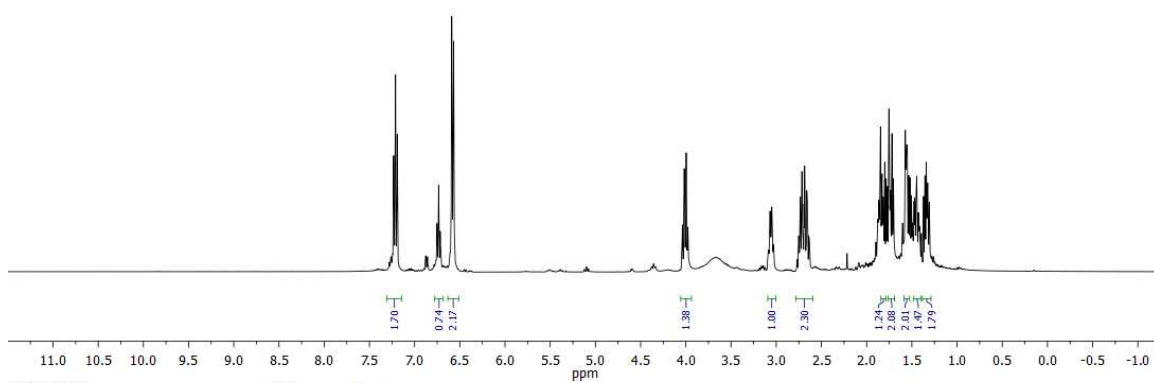

JW2018.2.fid  
JW2018 C13 F1

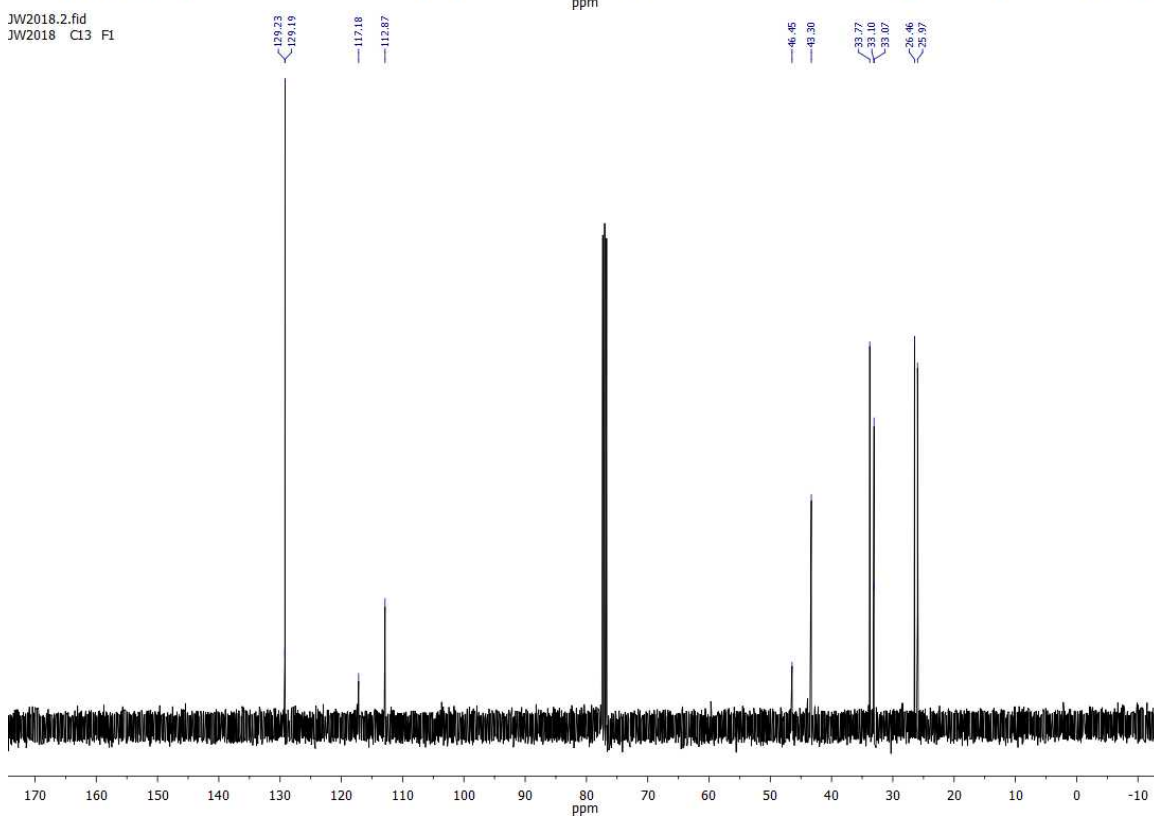

# COSY

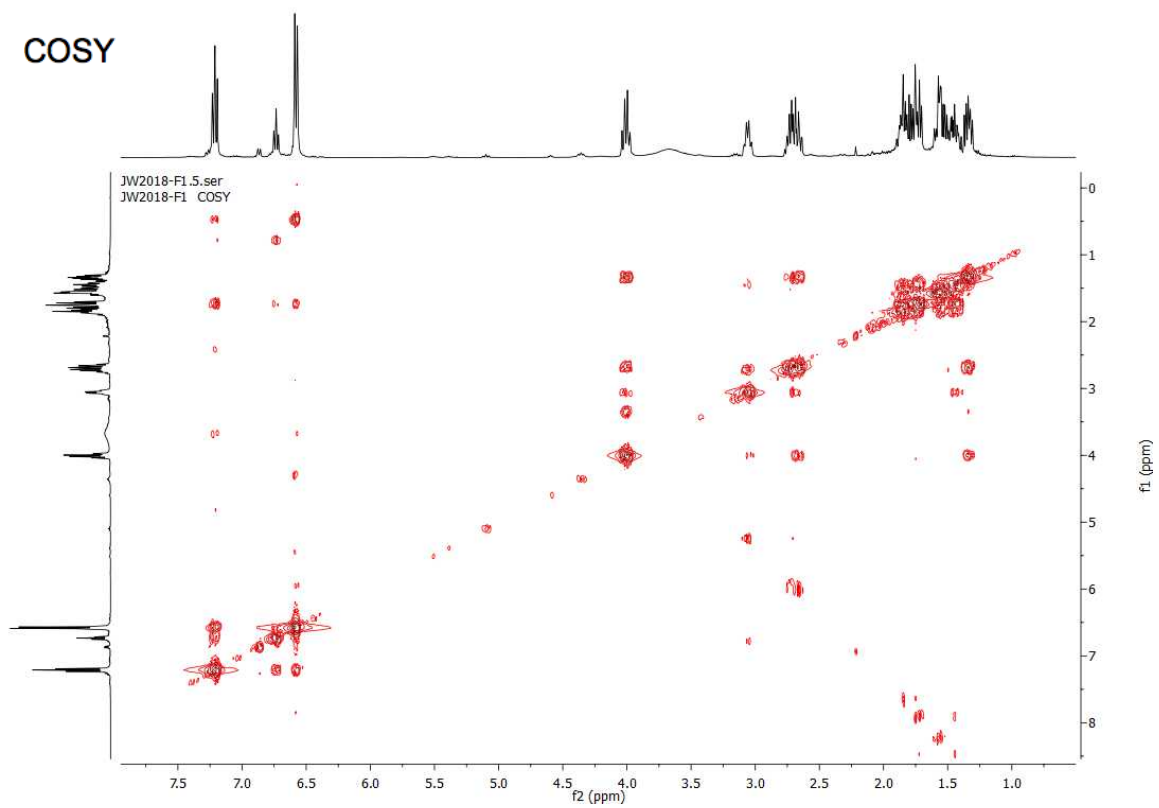

# NOESY

JW2018-F1 NOESY

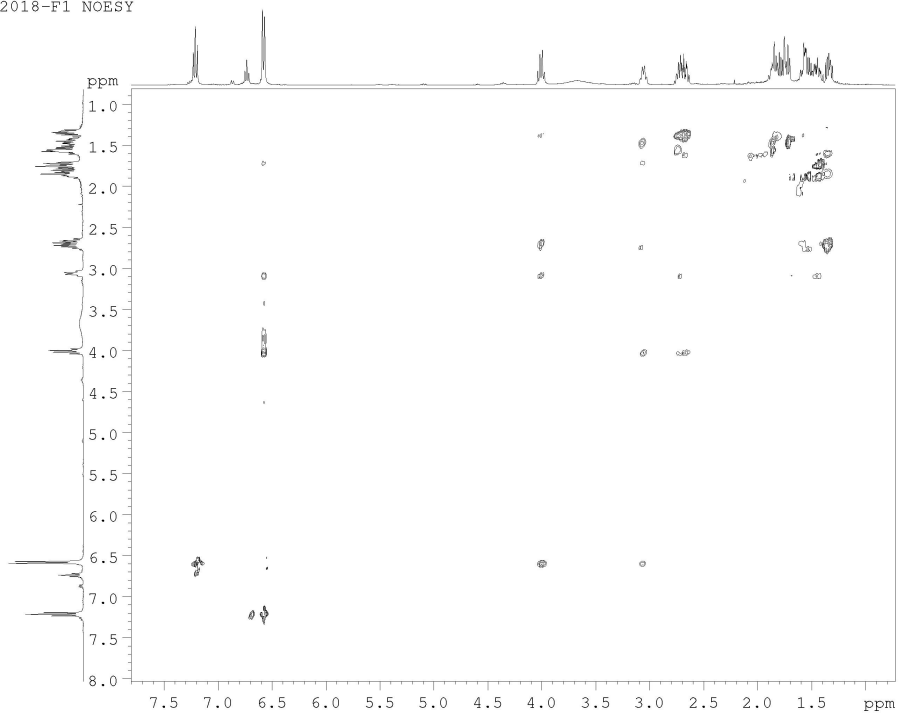

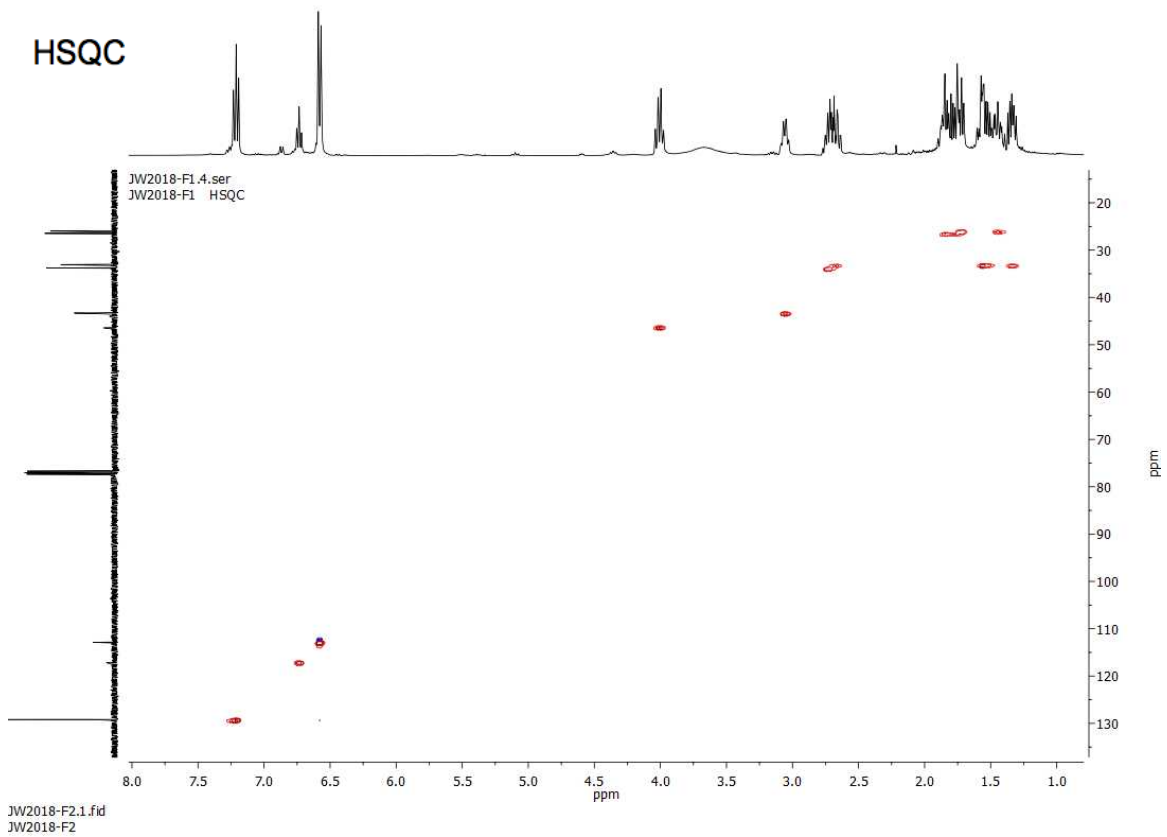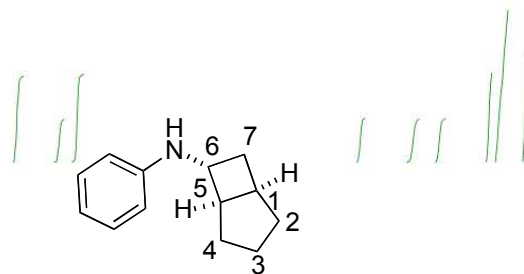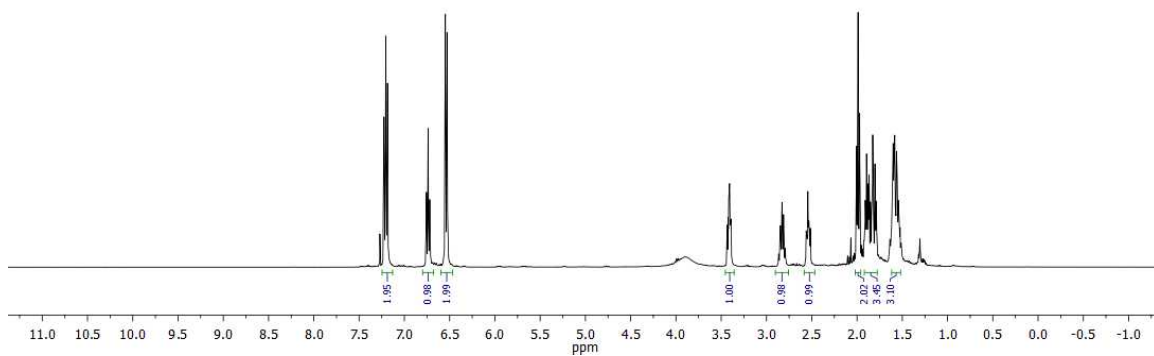

JW2018.4.fid  
JW2018 C13 F2

129.40

117.67

115.64

113.63

52.47

46.72

33.47

33.39

32.90

32.31

25.56

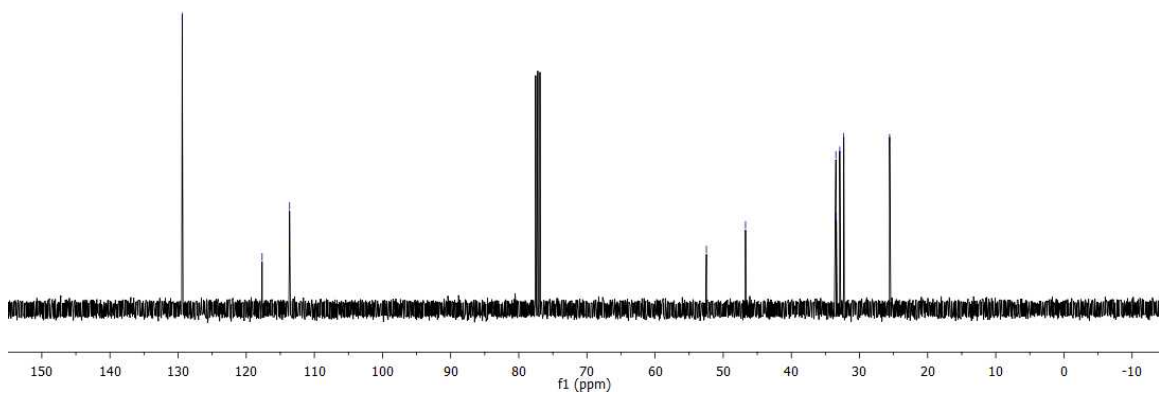

HSQC

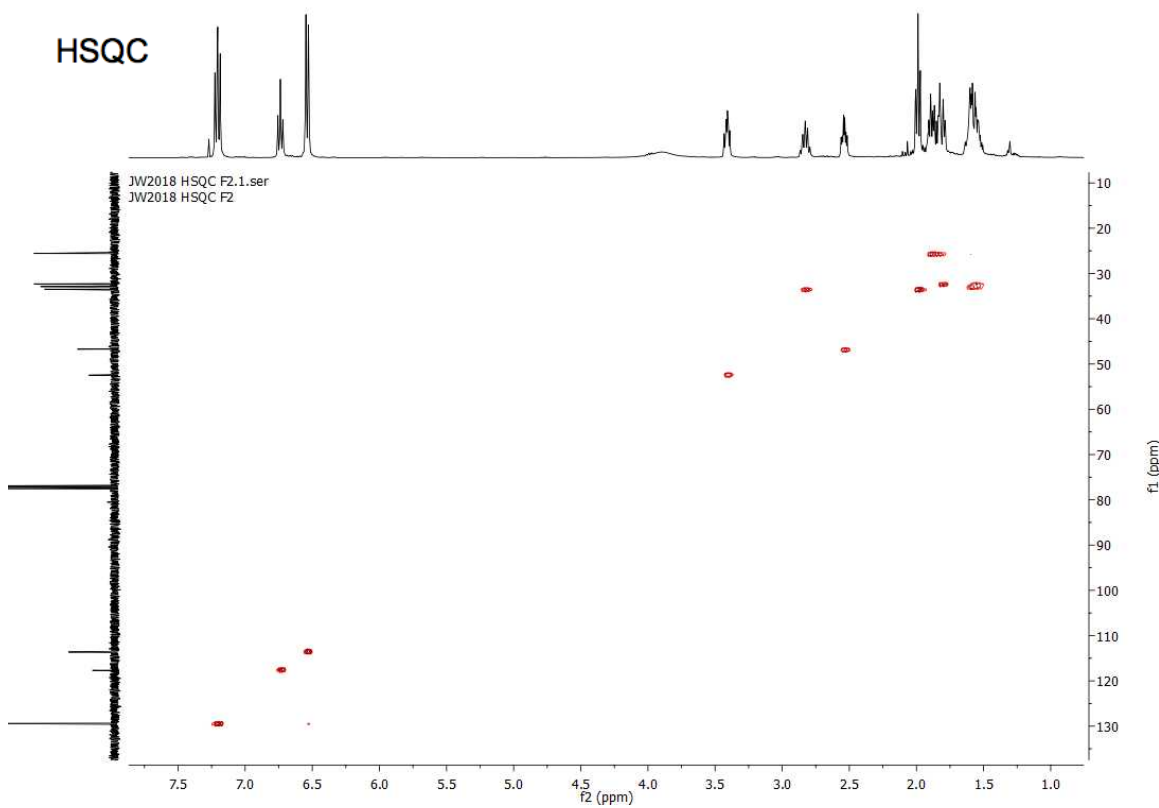

# COSY

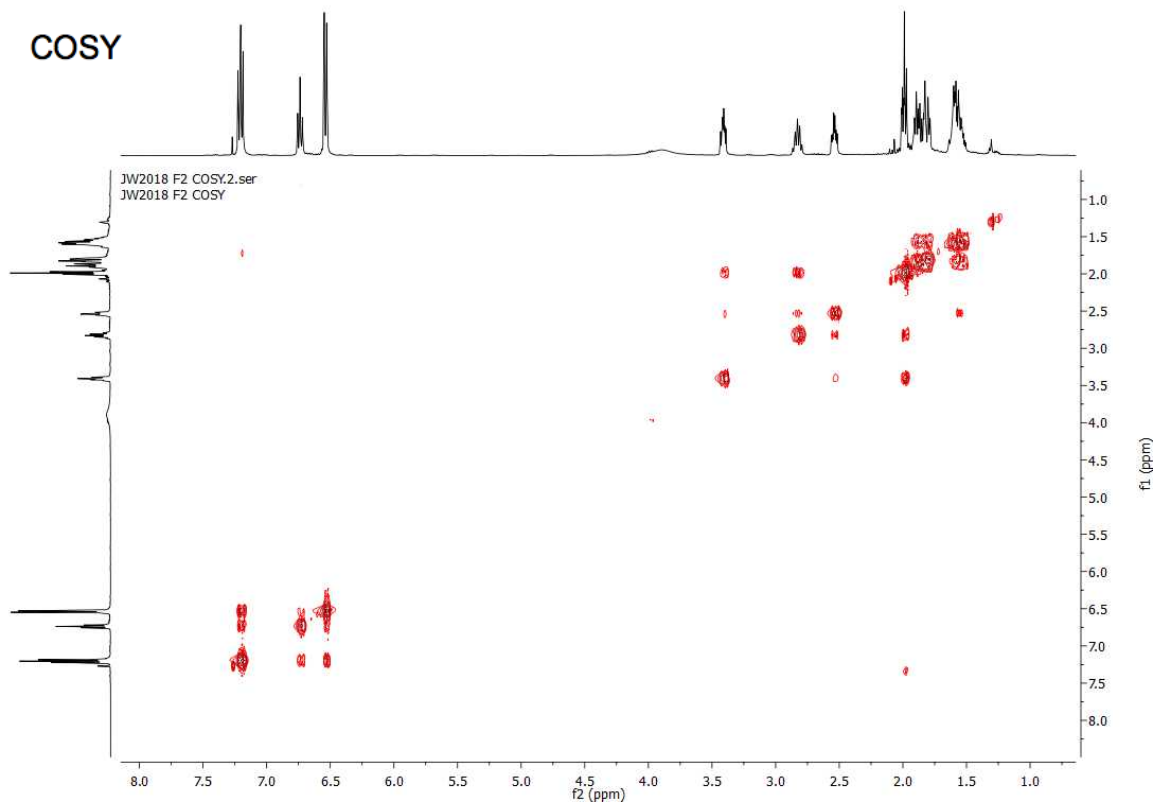

# NOESY

JW2018 F2 NOESY

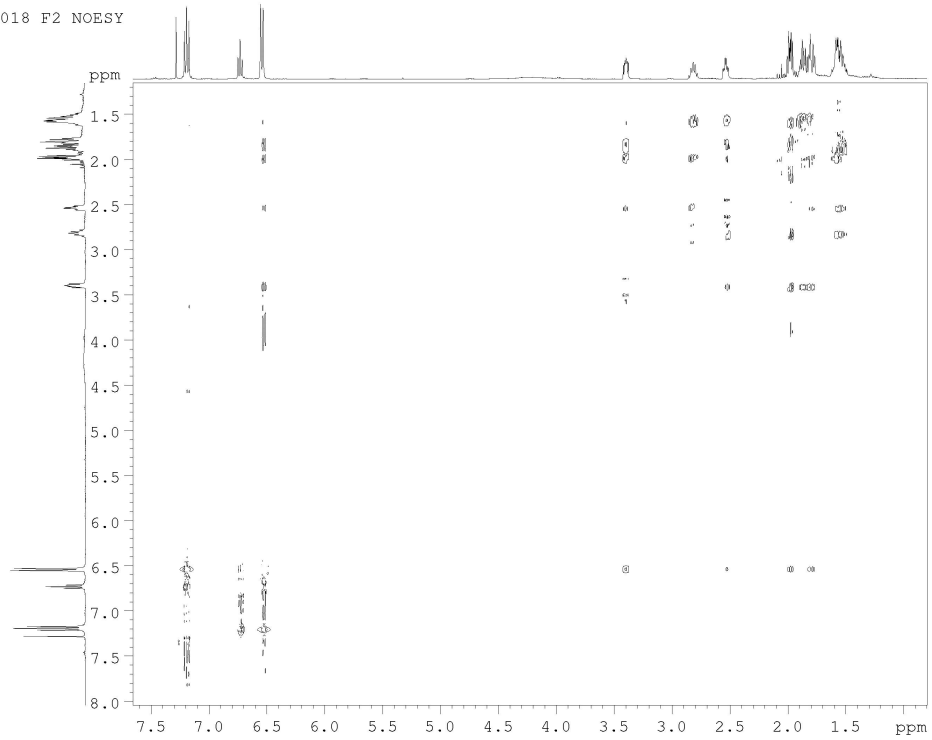



JW2037-F1.2.fid  
tkb-6-BuLI-THF-d8

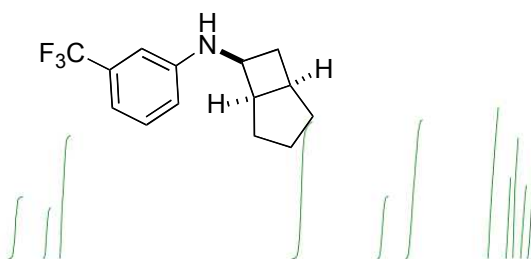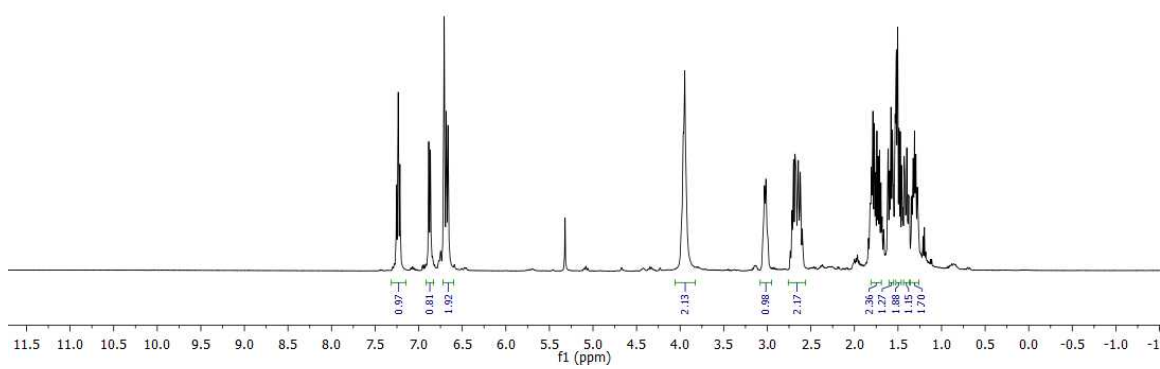

JW2037-F1.1.fid  
JW2037-F1 Cl3

148.01  
130.97  
129.57  
124.88  
115.59  
112.94  
108.57  
6.13  
43.09  
33.83  
32.93  
32.71  
26.31  
25.83

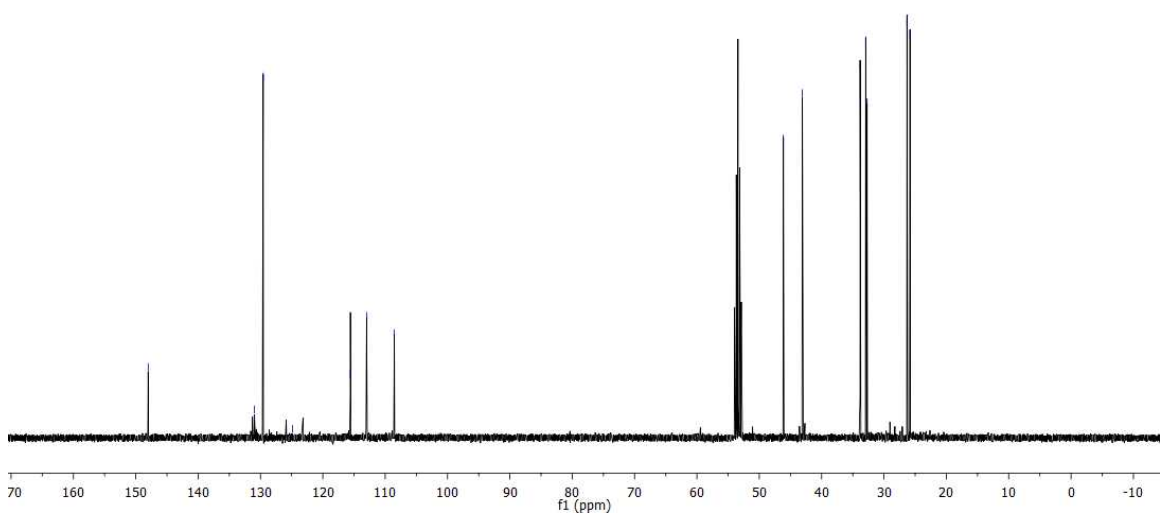

# HSQC

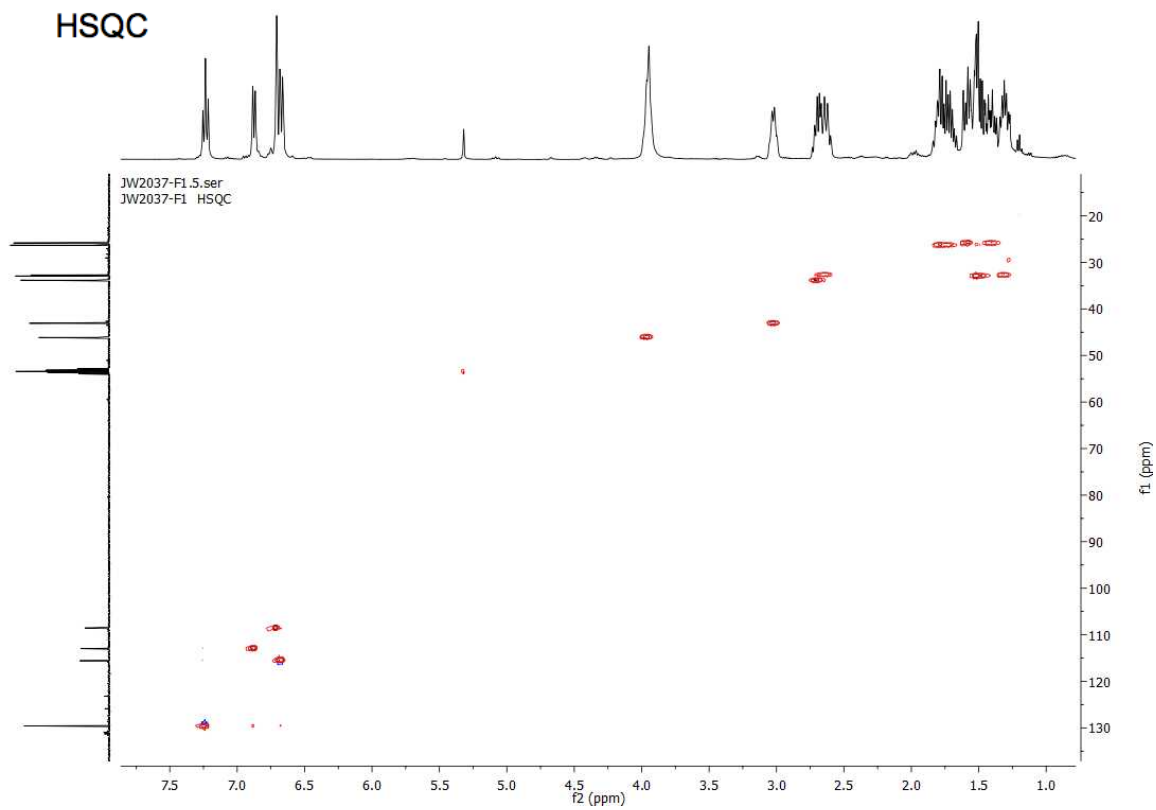

# COSY

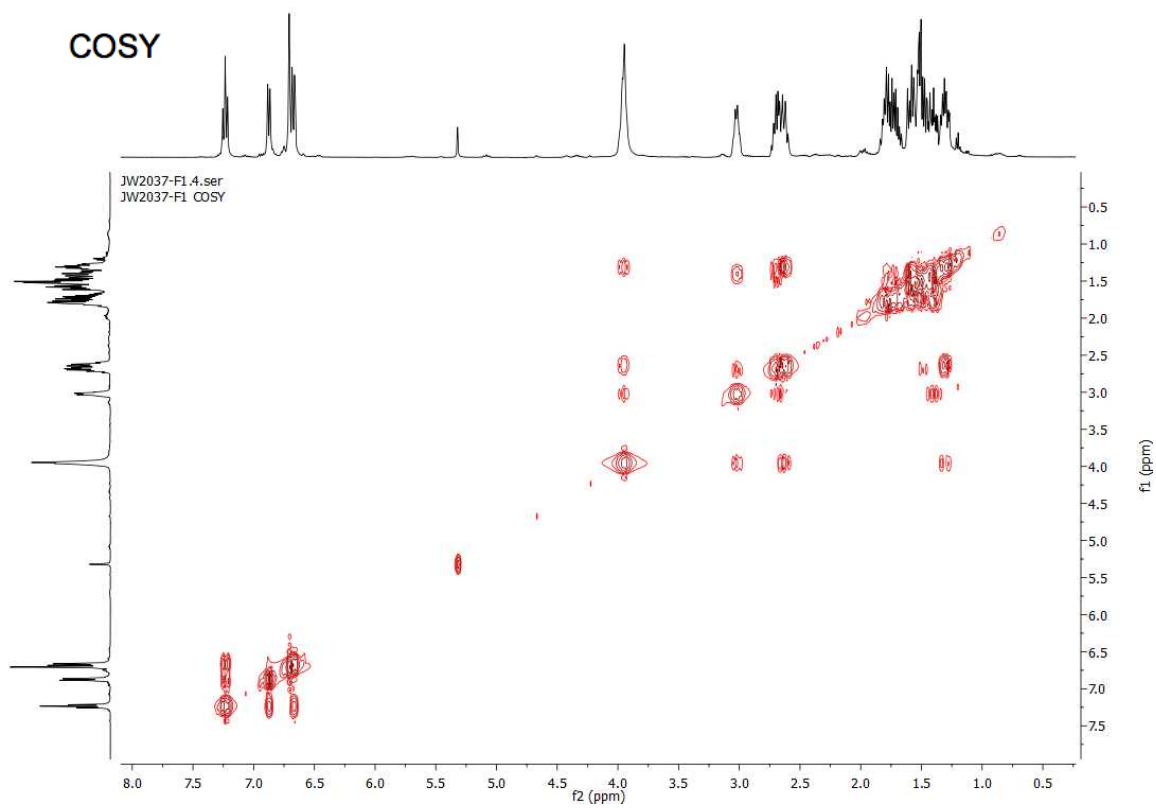

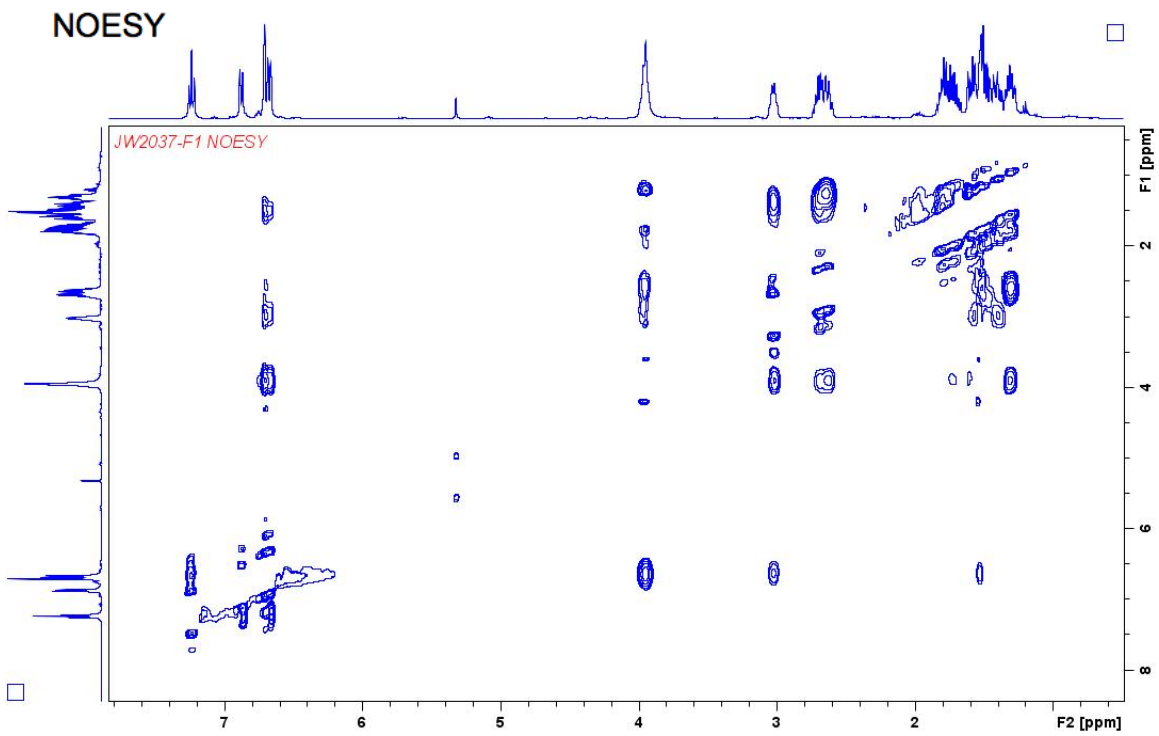

JW2037-F2.2.fid  
JW2037-F2.H1

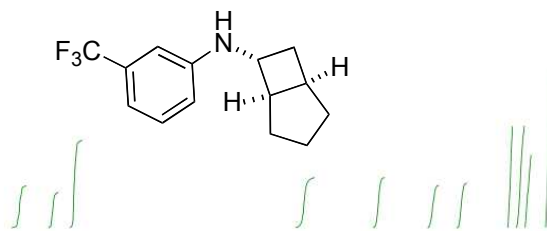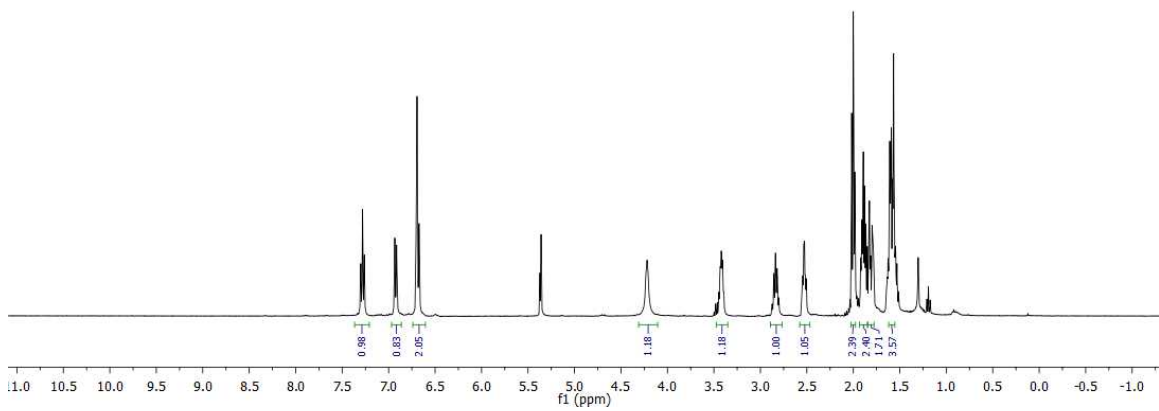

JW2037-F2-Cl 3.1.fid  
JW2037-F2-Cl 3

131.52  
129.55  
125.19  
116.19  
113.16  
109.03

51.82  
46.47  
33.34  
32.86  
32.57  
31.99  
25.31

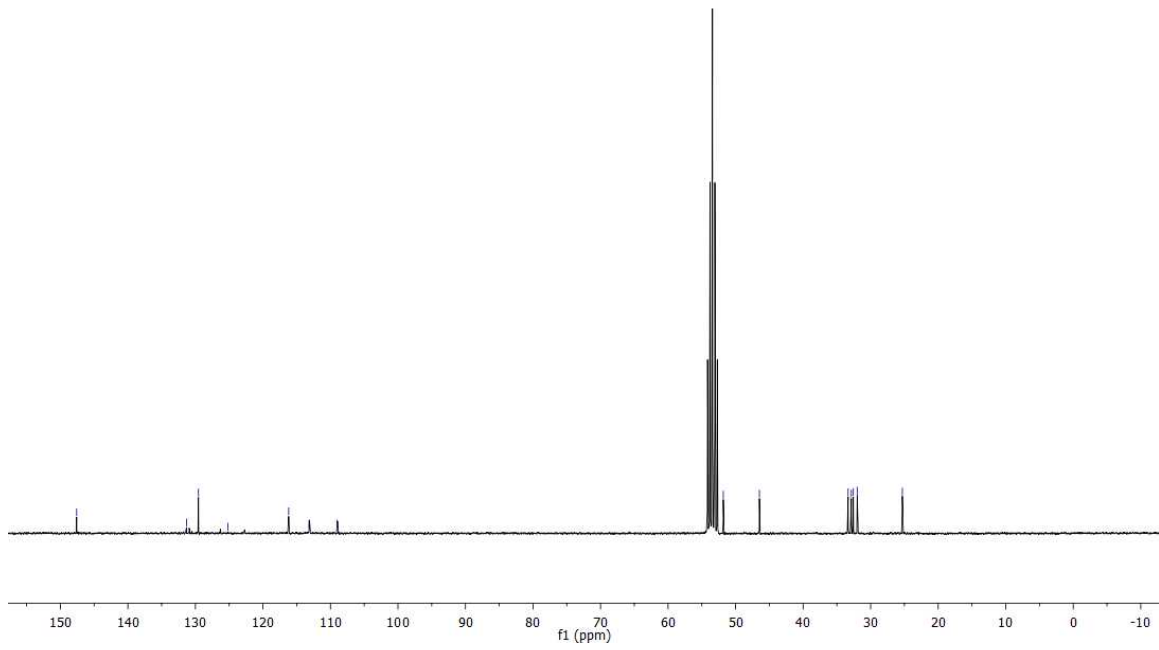

JW2073-F1.1.fid

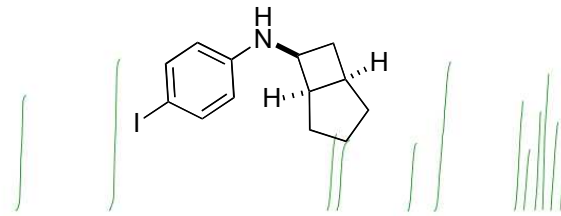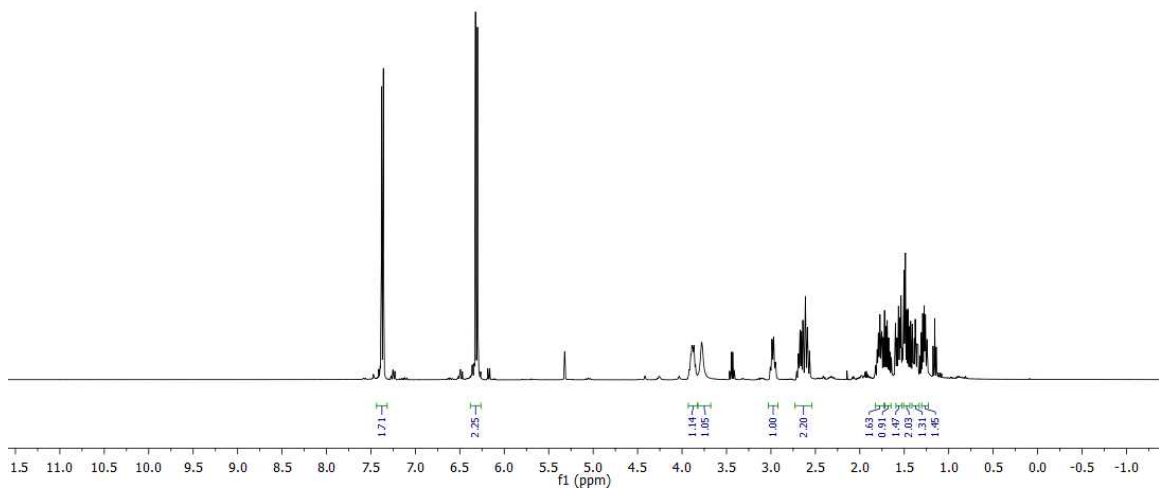

JW2073-F1.3.fid  
tkb-6-BuLi-THF-d8

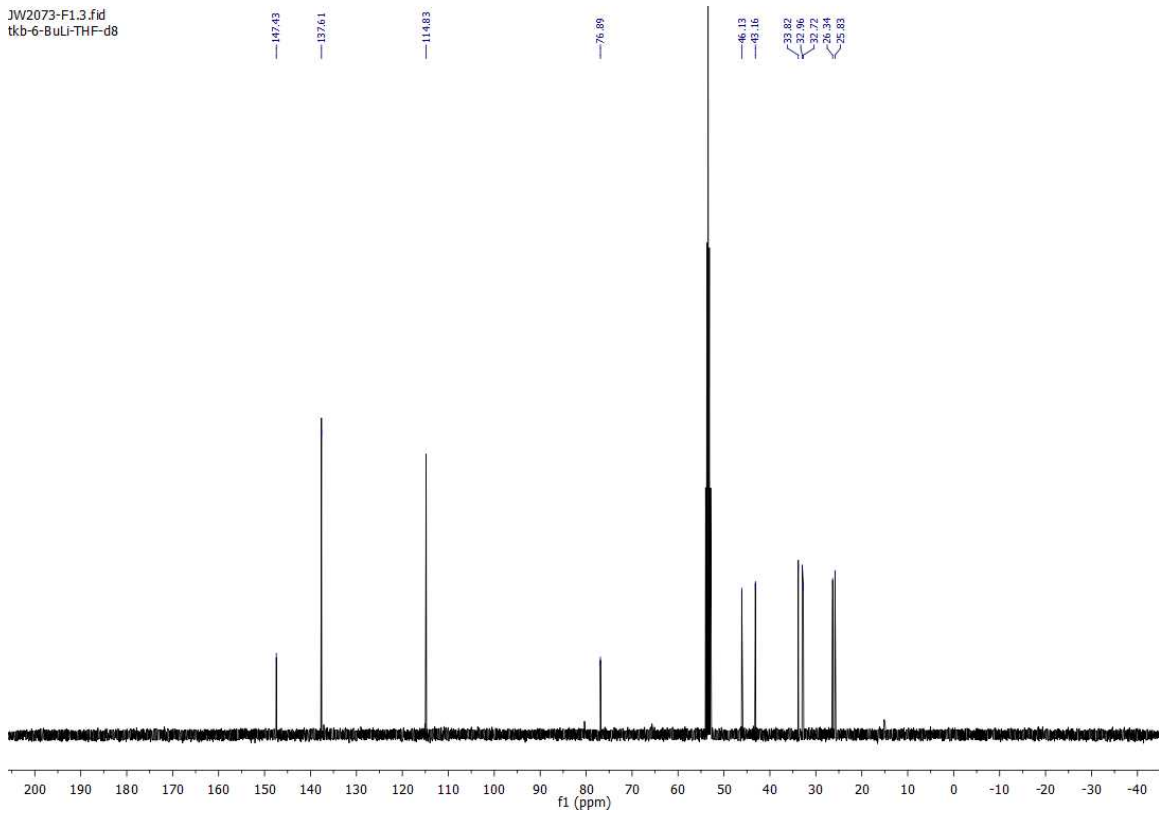

HSQC

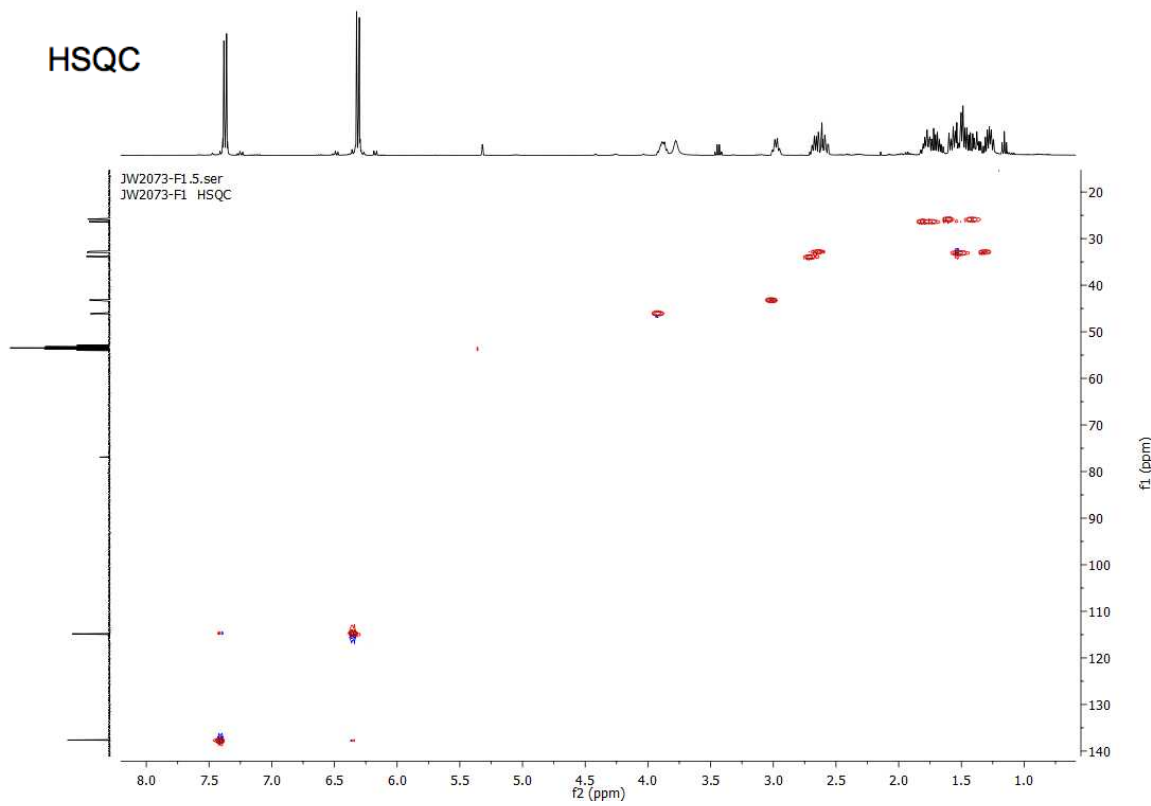

# COSY

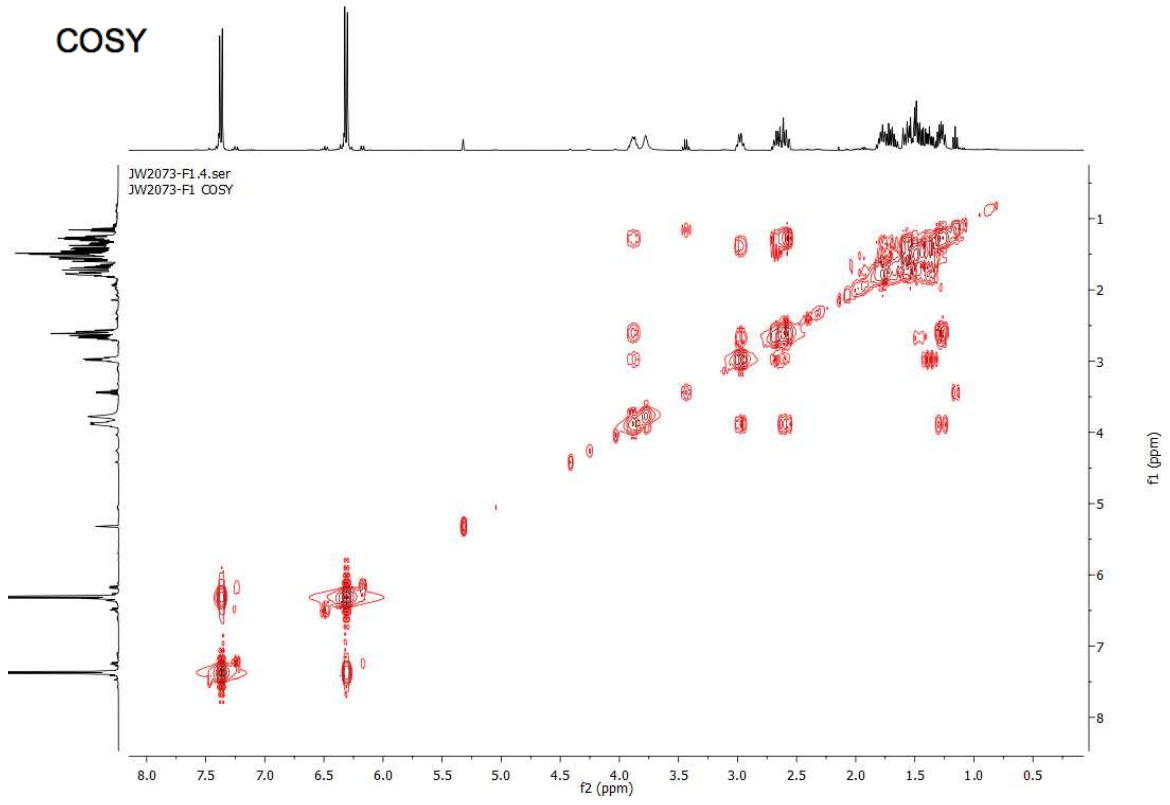

# NOESY

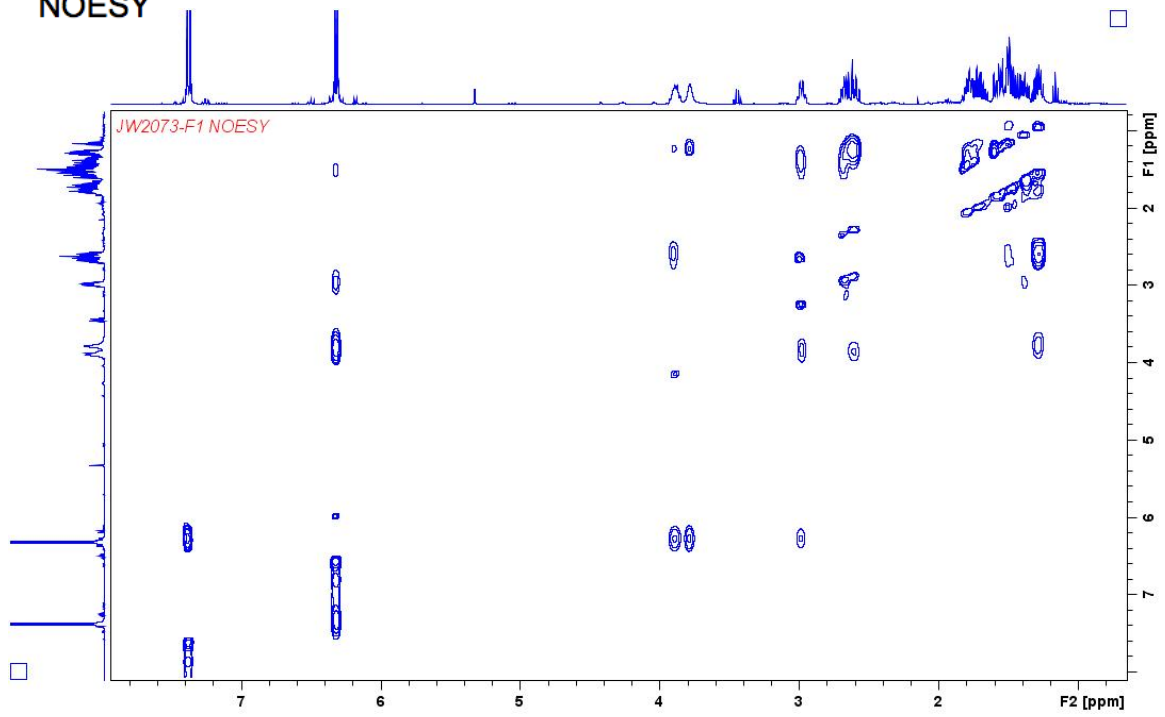

JW2073-F2.3.fid  
JW2073-F2 H1

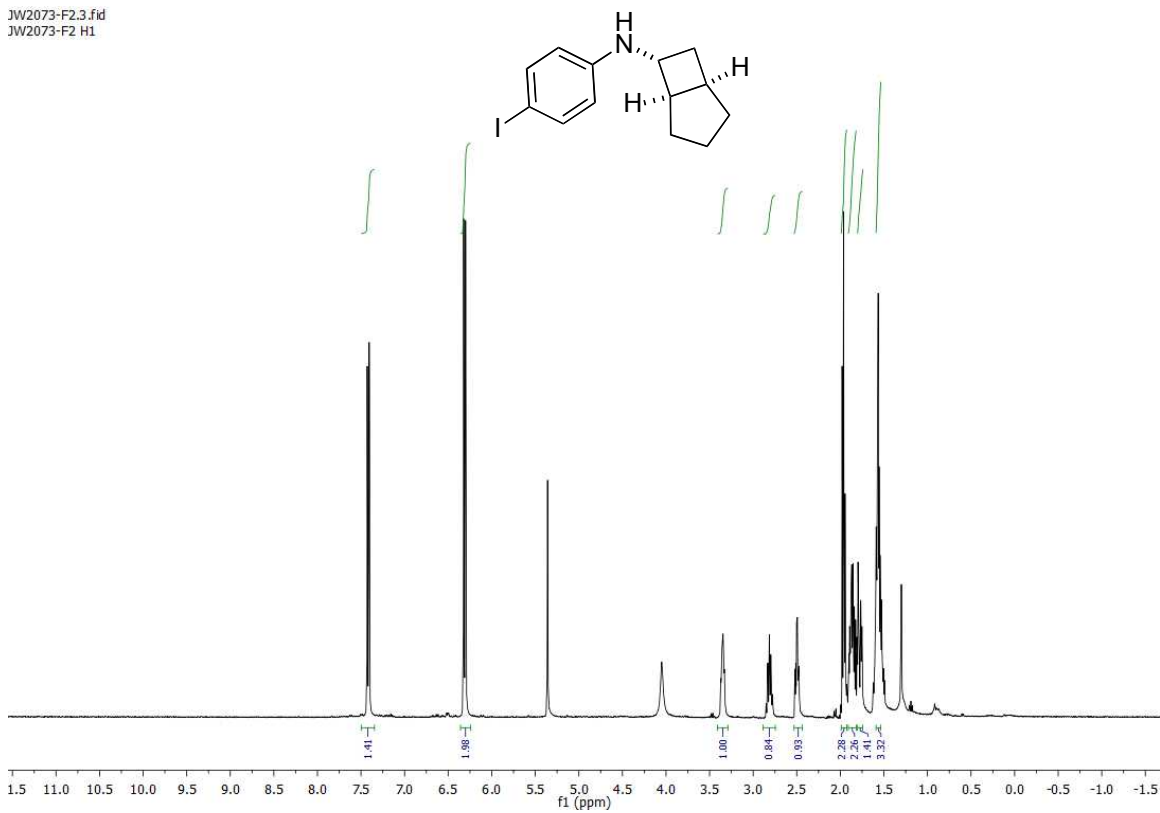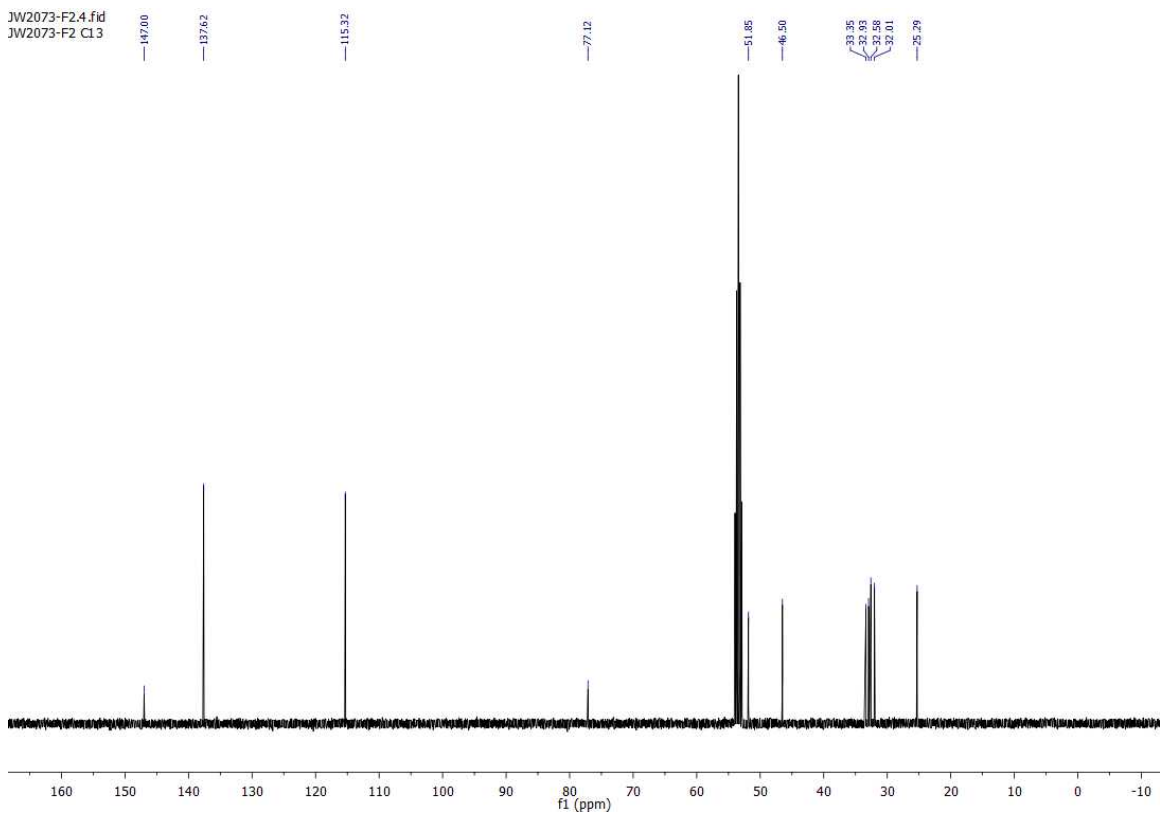

JW1151-F1.1.fid  
JW1151 H1

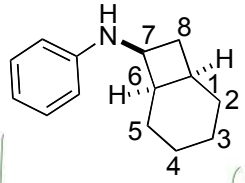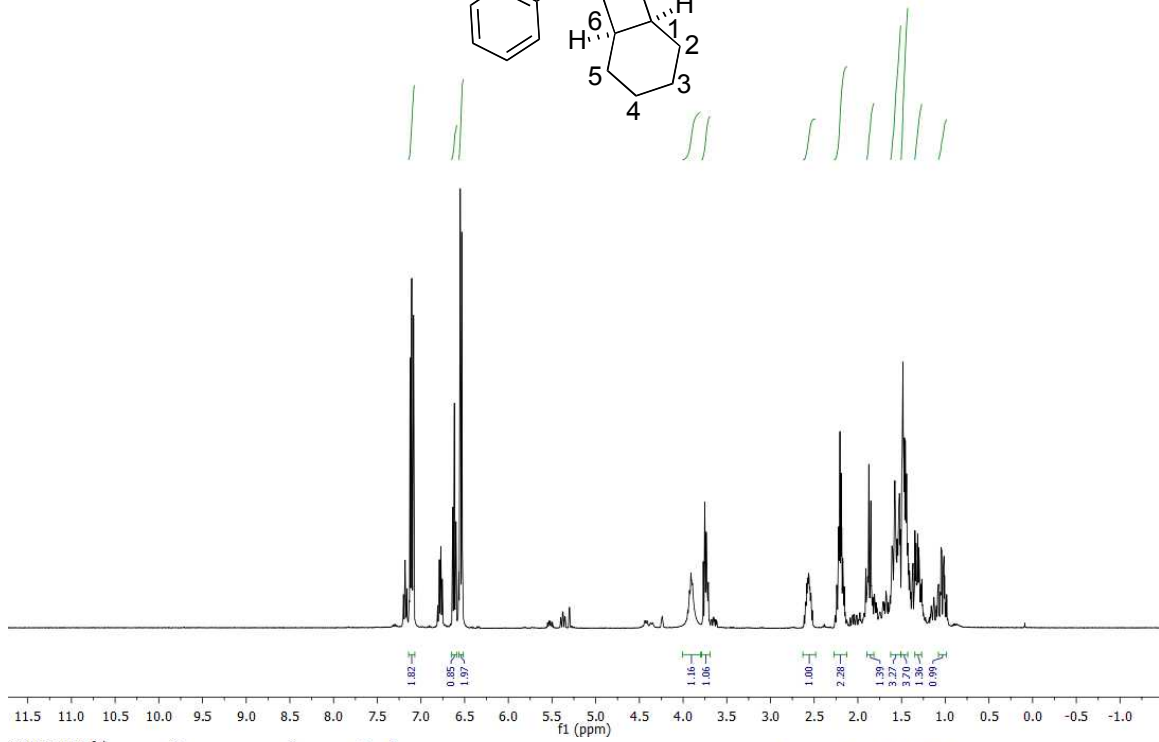

JW1151-F1.2.fid  
JW1151-F1 C13

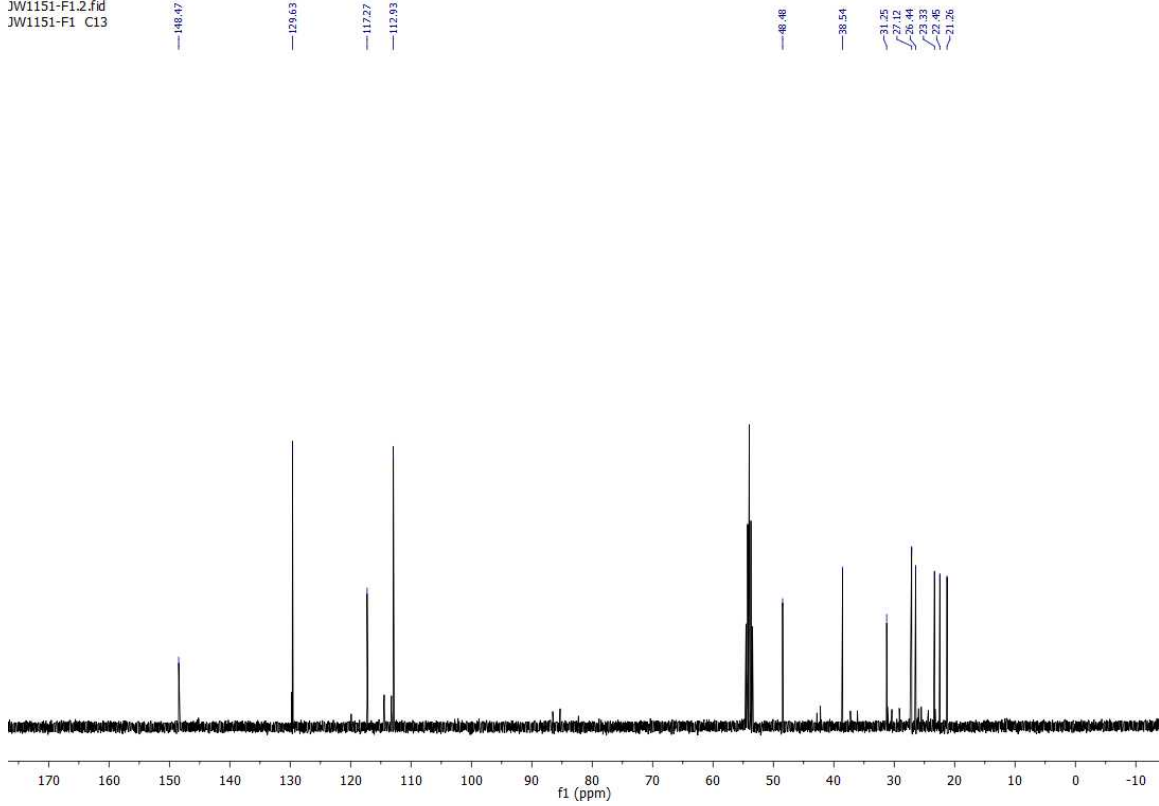



# HSQC

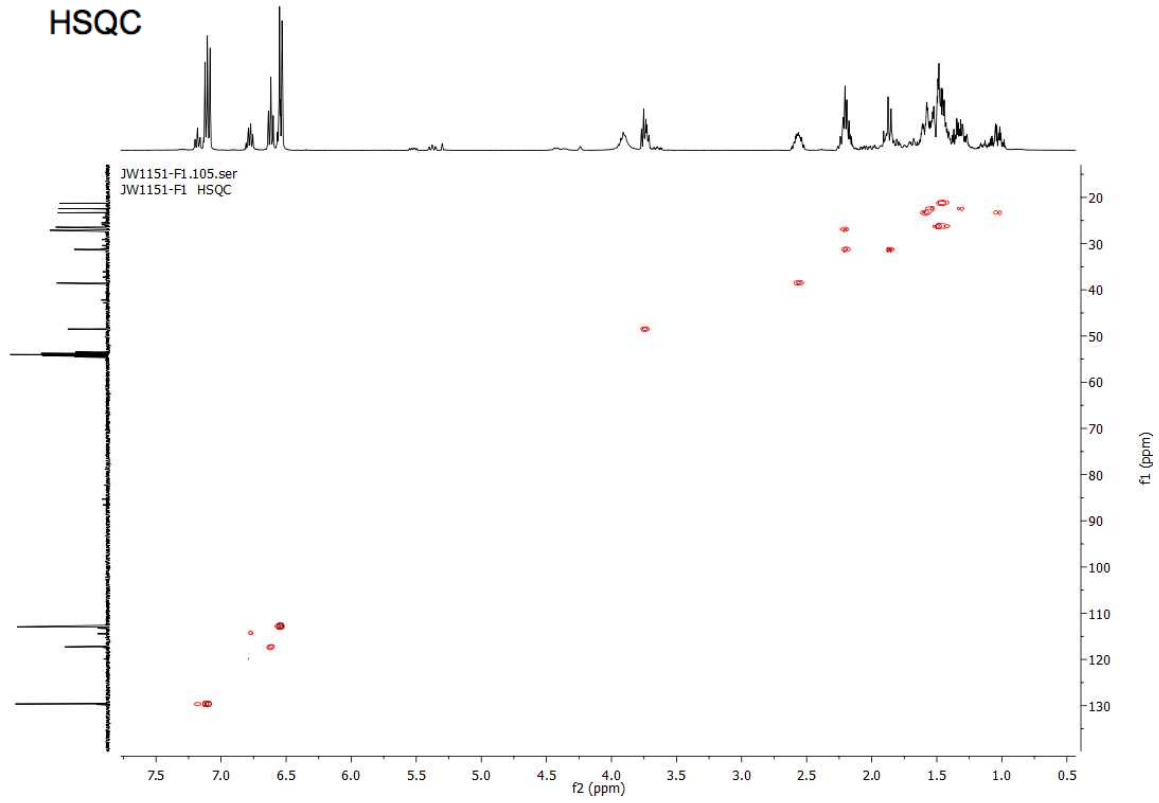

# COSY

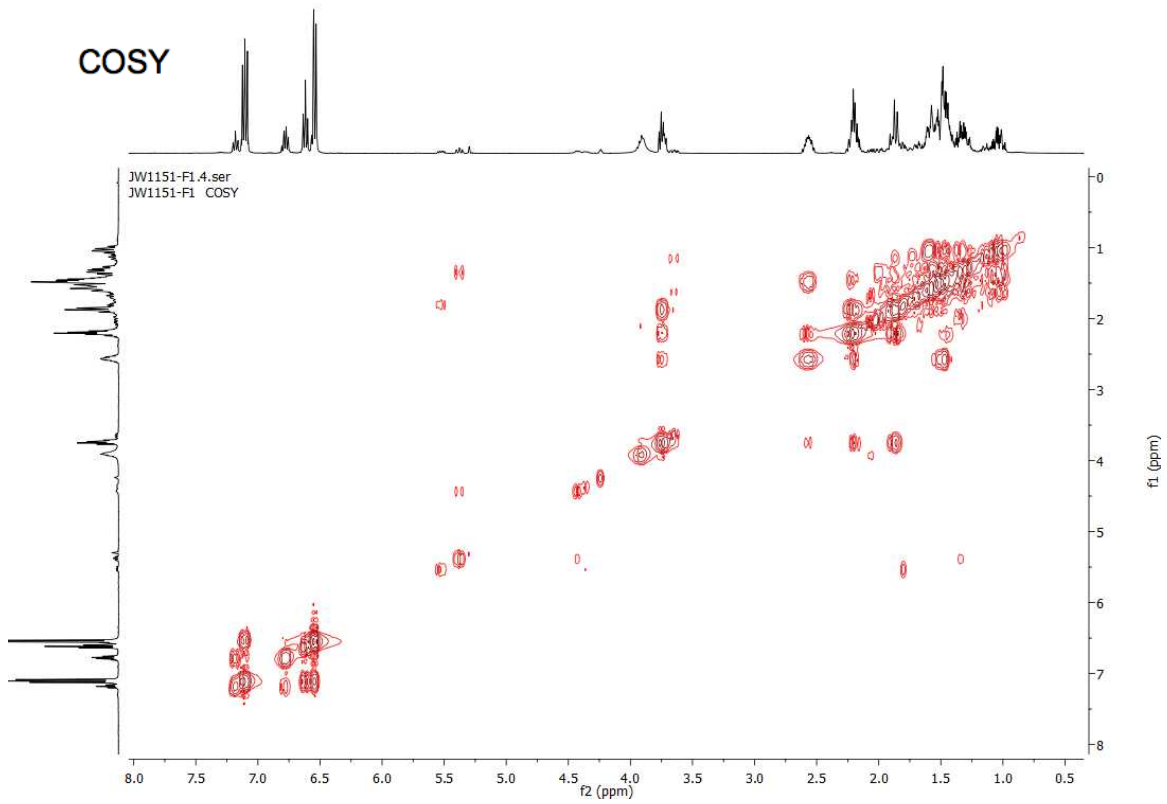

# NOESY

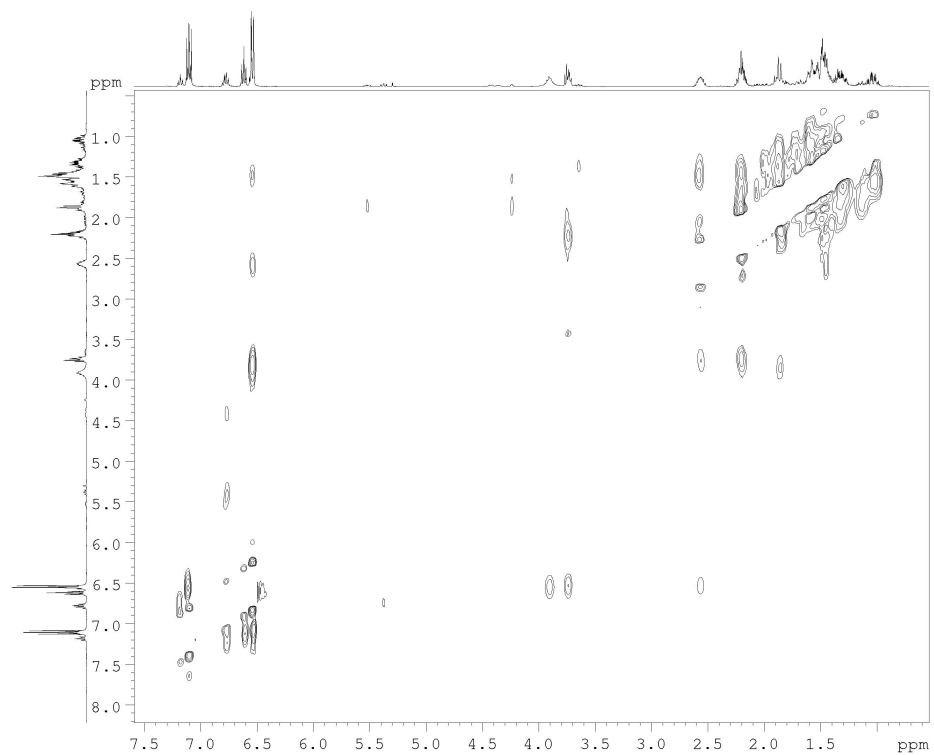

JW1151-F2.1.fid  
JW1151-F2 H1

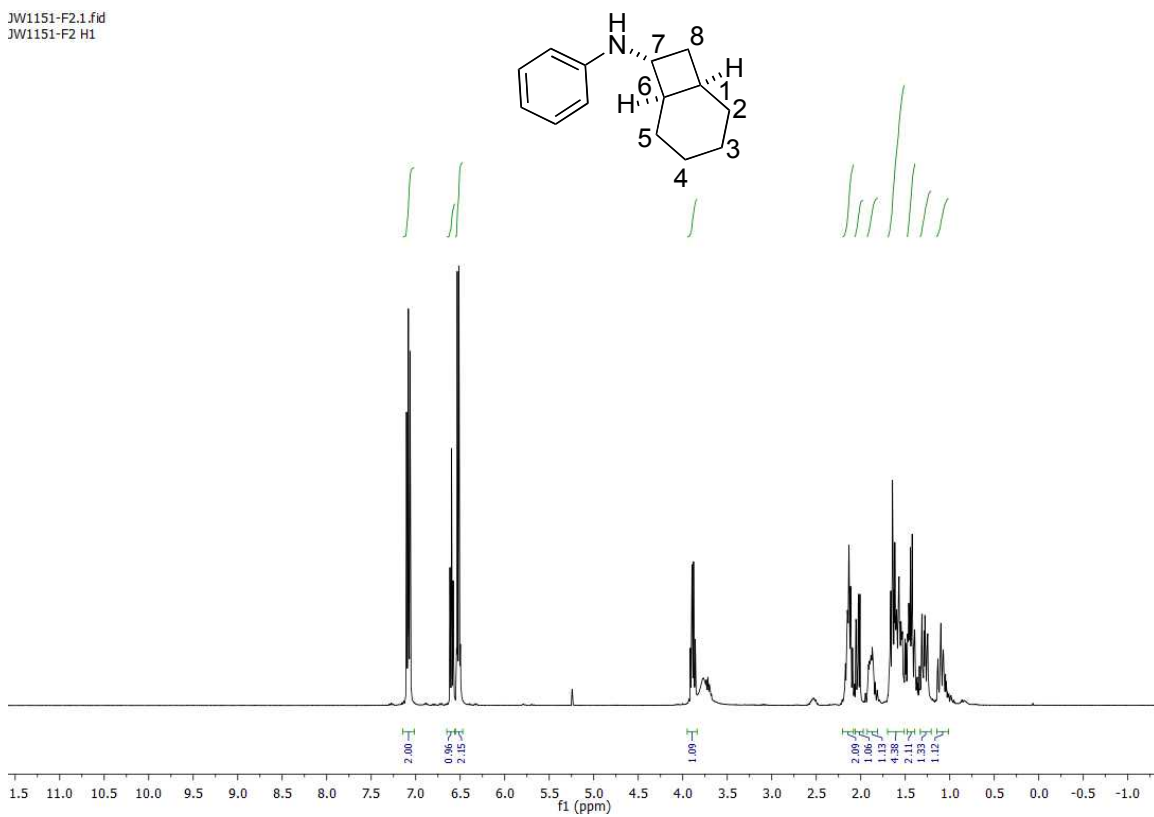

JW1151-F2.2.fid  
JW1151-F2 c13

146.43

129.68

117.43

113.26

50.07

42.81

36.12

30.02

27.46

25.98

24.39

23.25

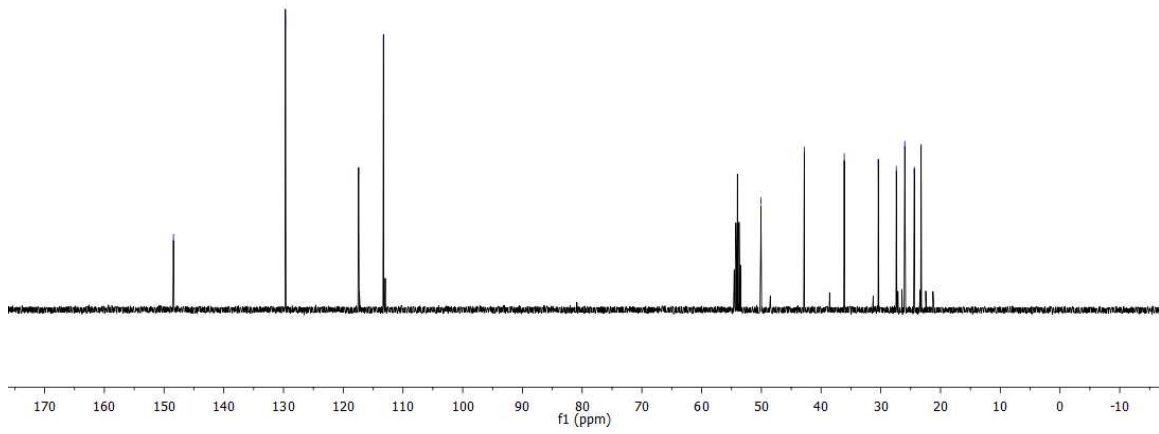

HSQC

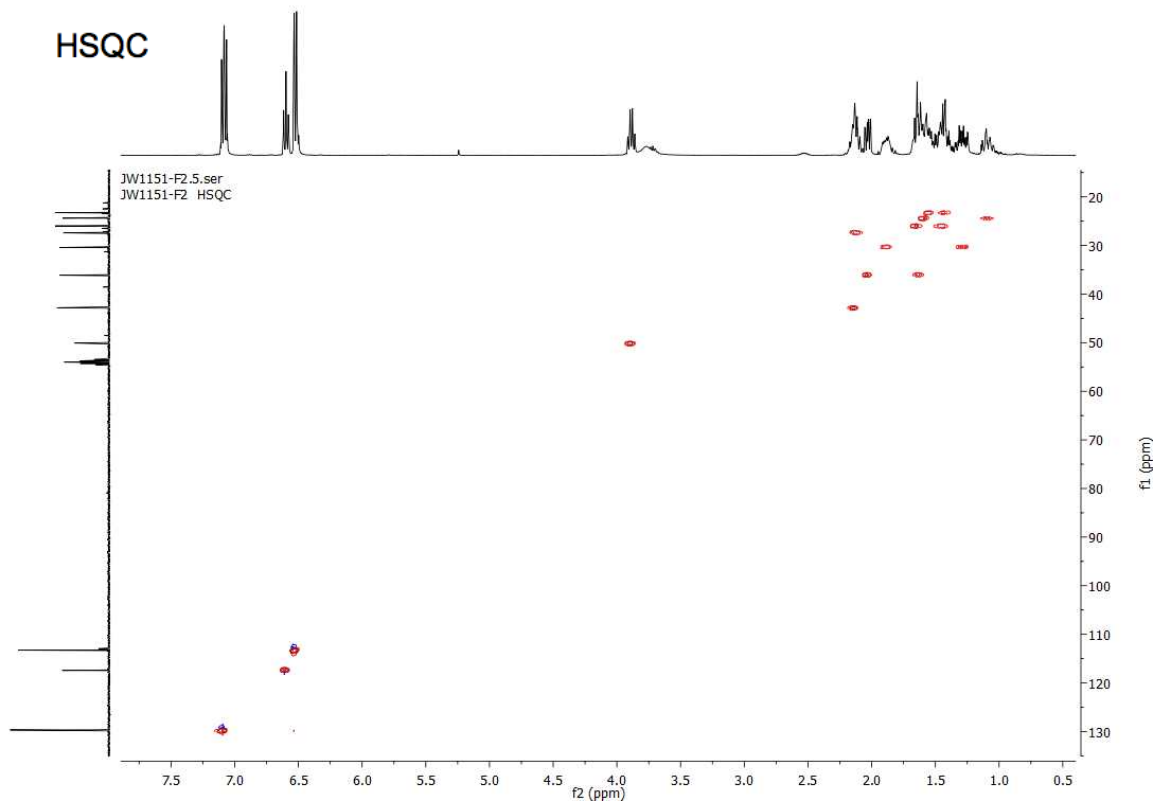

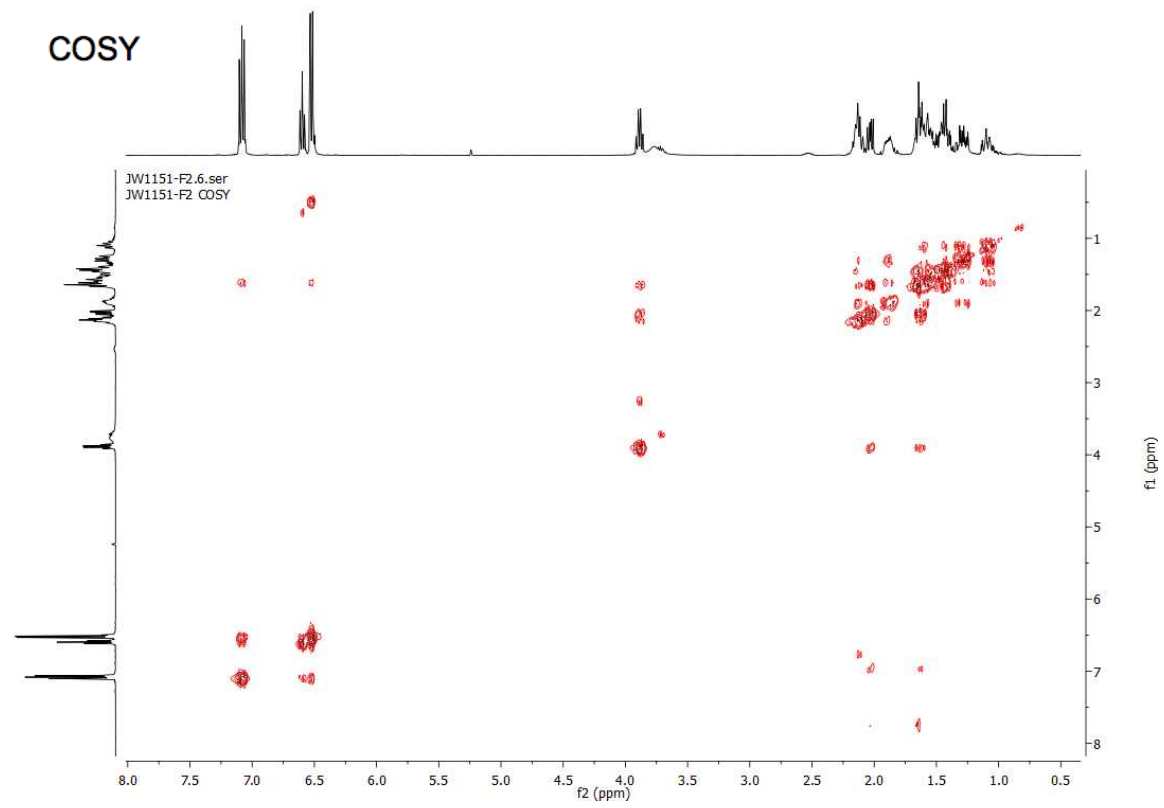

### NOESY

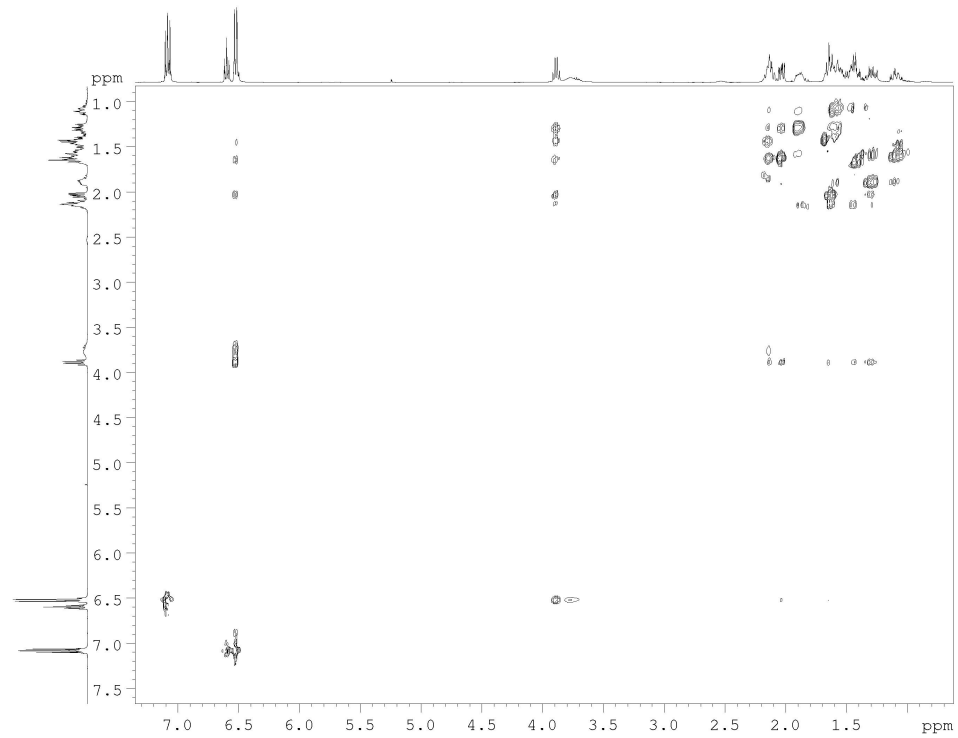

JW1075-1.3.fid  
pure strychnine

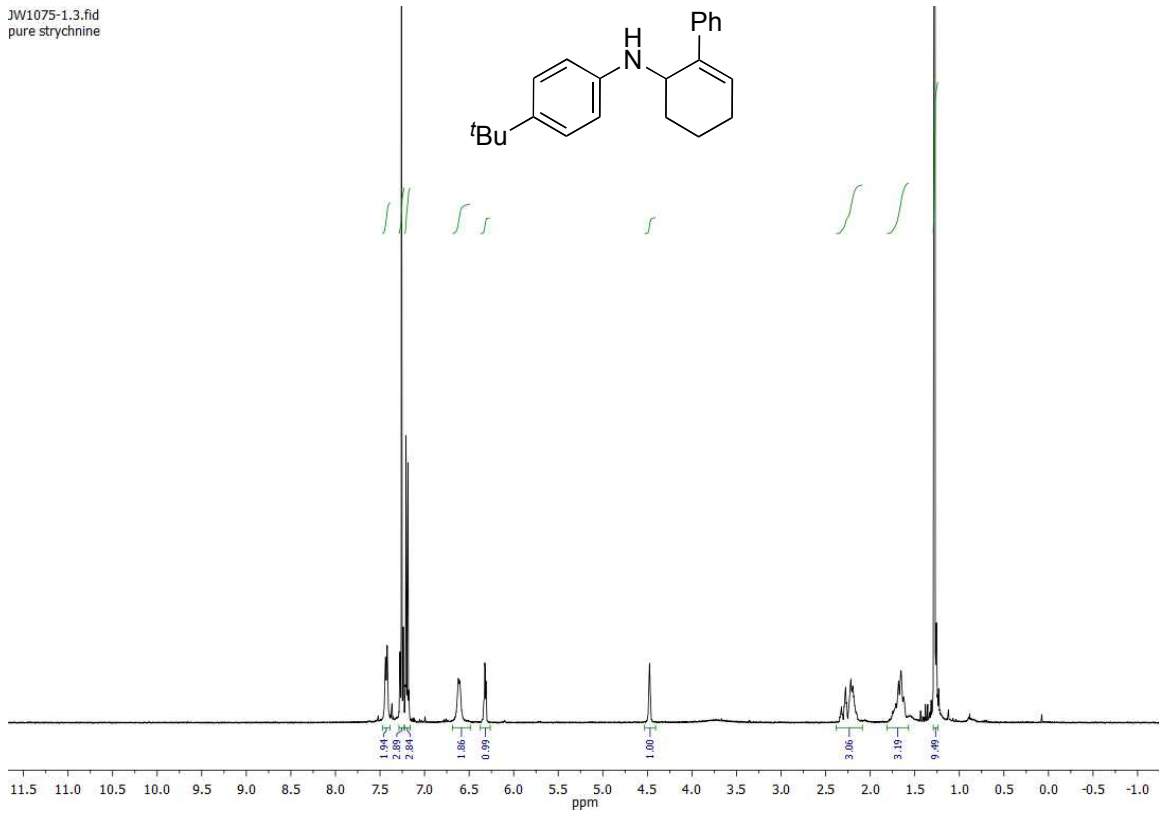

JW1075-1.5.fid  
JW1075-1

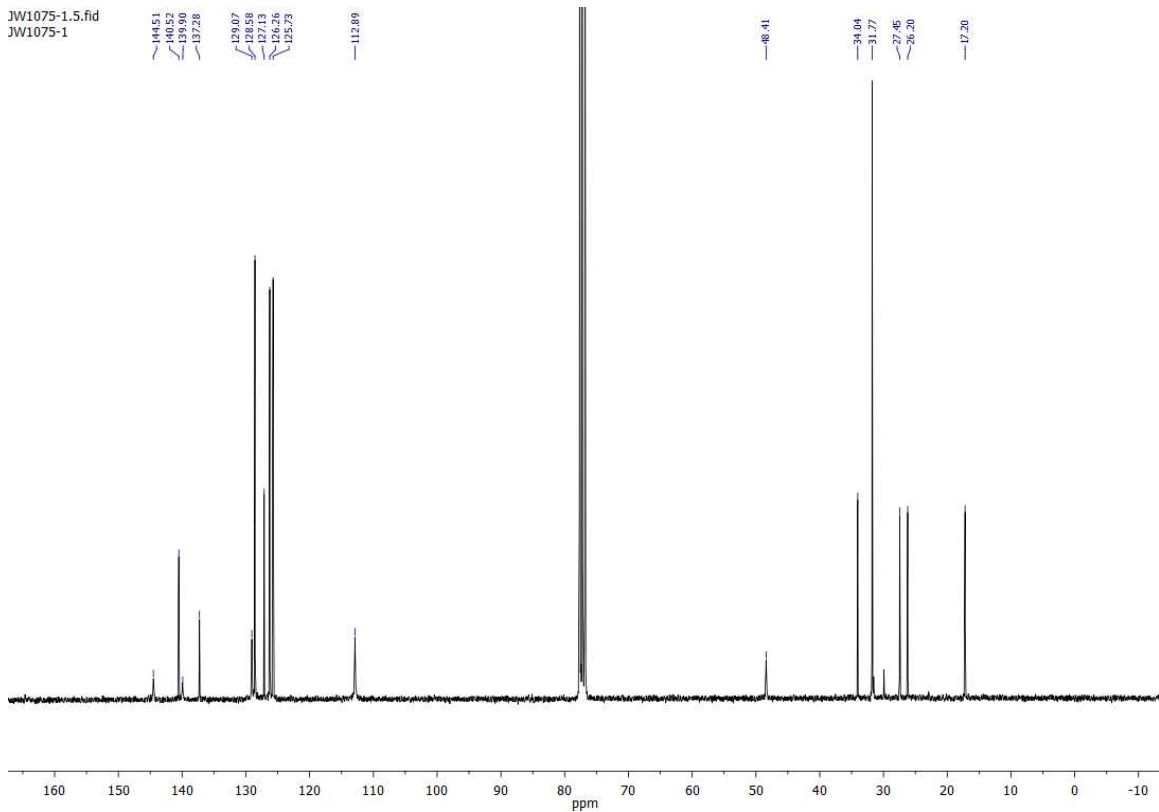

JW1247.4.fid  
JW1247 H1

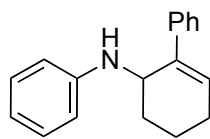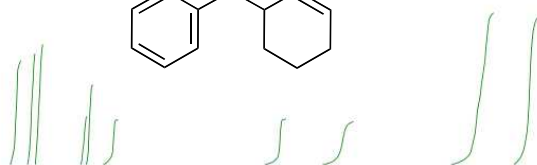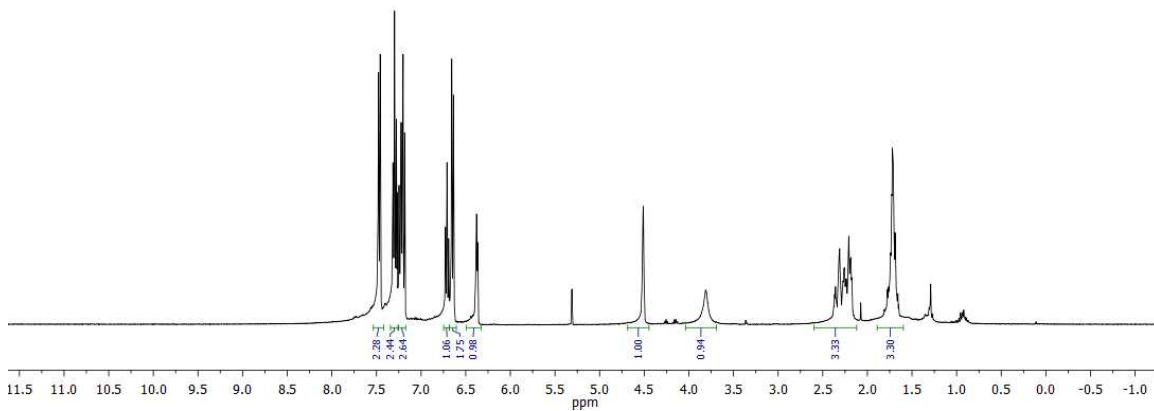

JW1247.5.fid  
JW1247 C13

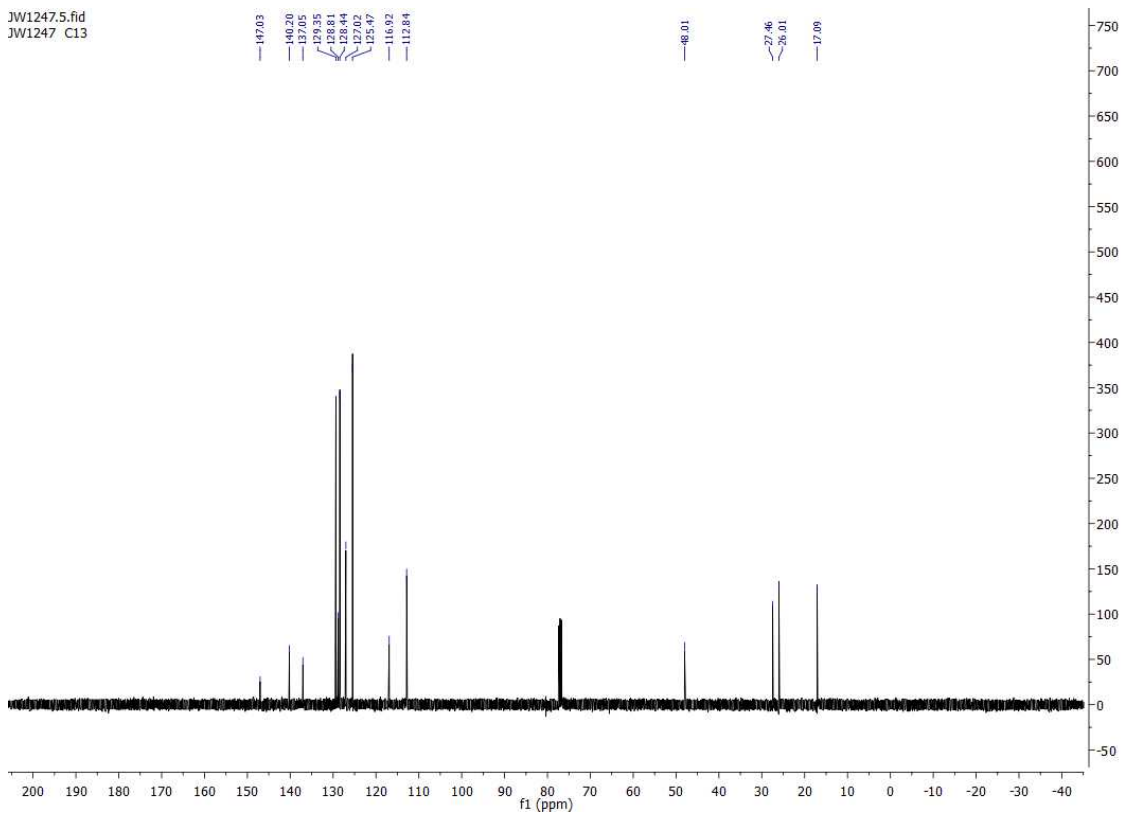

JW1229-1.7.fid  
JW1229-1-1 H1

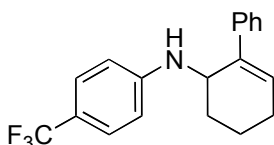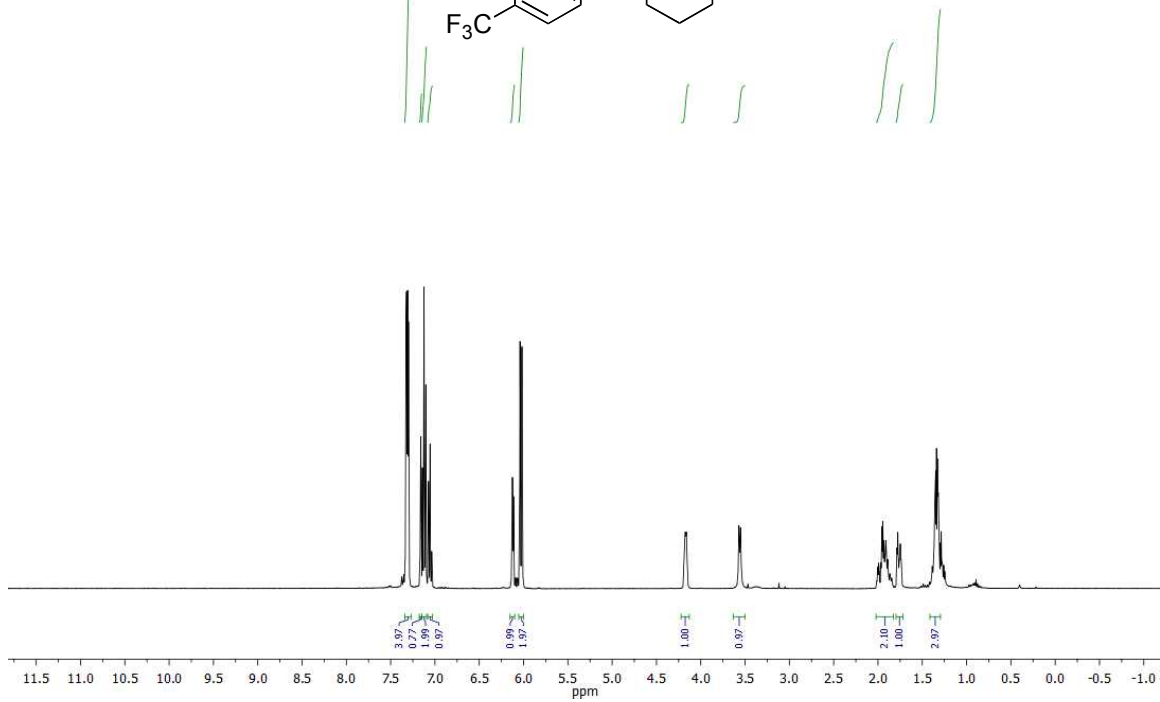

JW1229-1.8.fid  
JW1229-1-1 C13

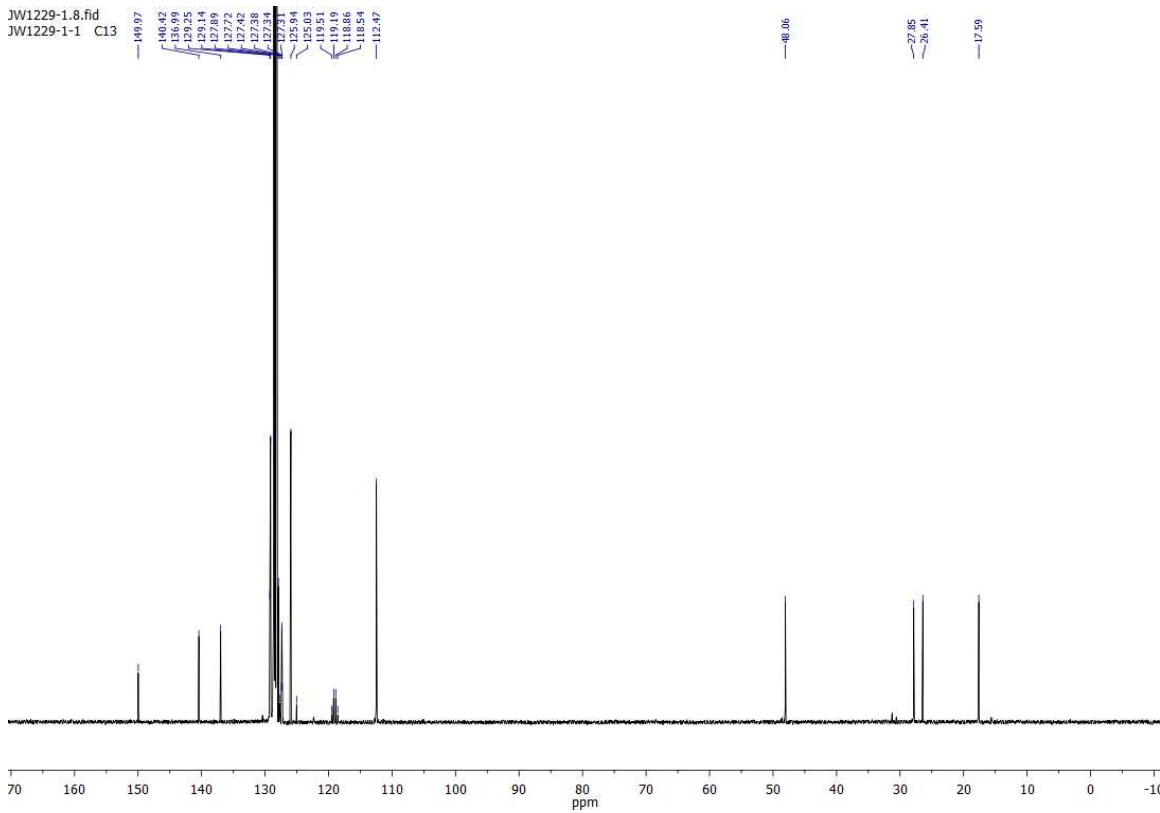

JW1245-2.2.fid  
pure strychnine

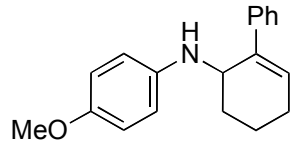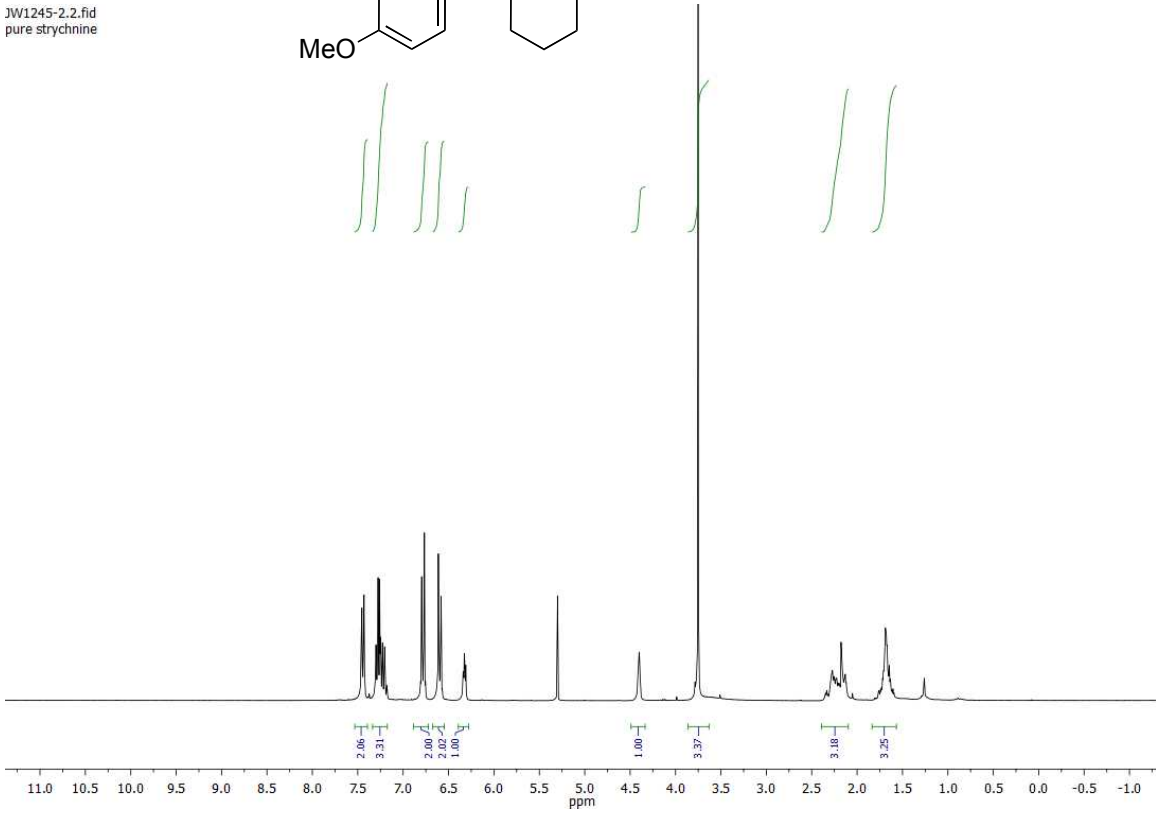

JW1245-2.4.fid  
JW1245-2 C13

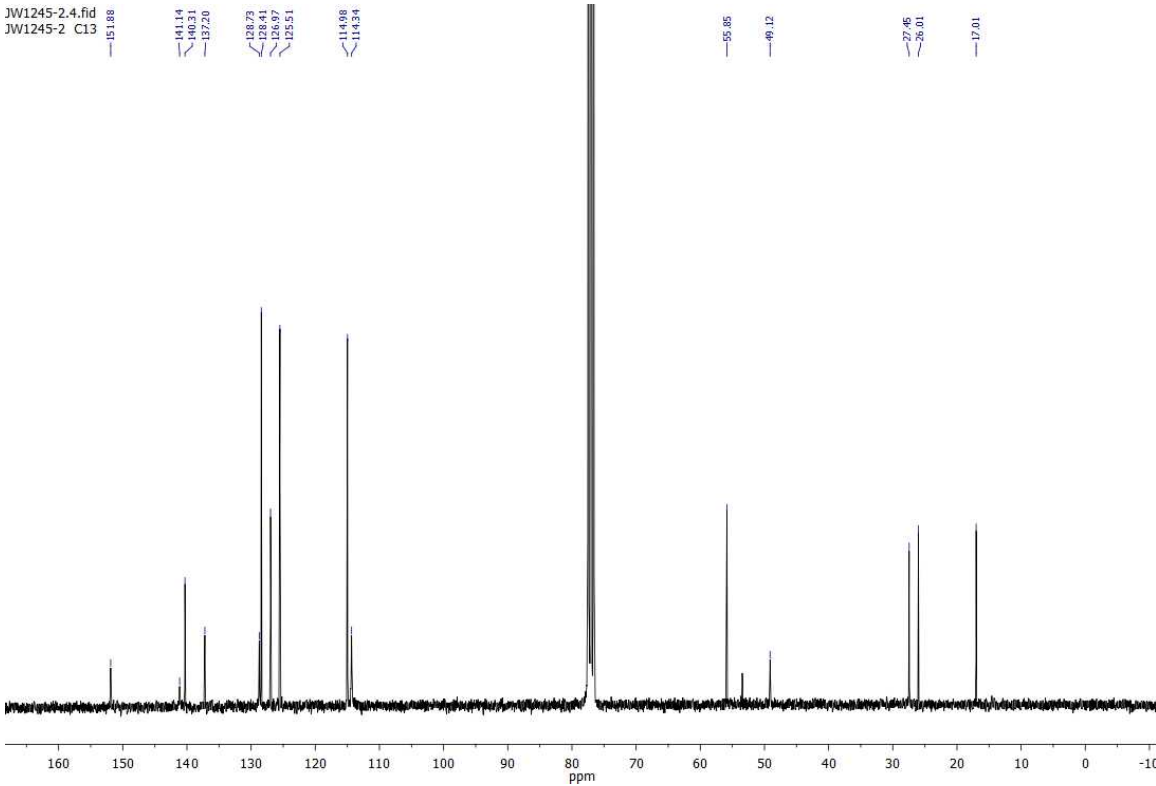



JW1238.5.fid  
JW1238 H1

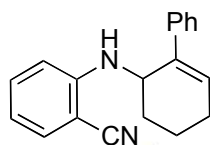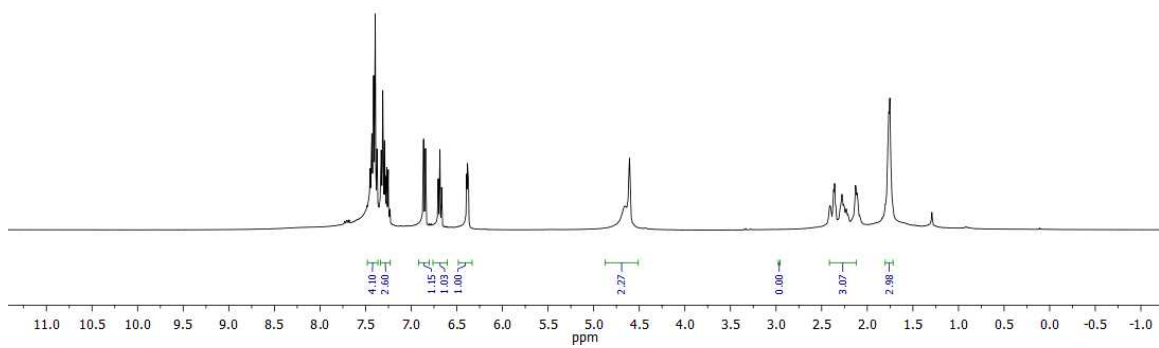

JW1238.3.fid  
JW1238 C13

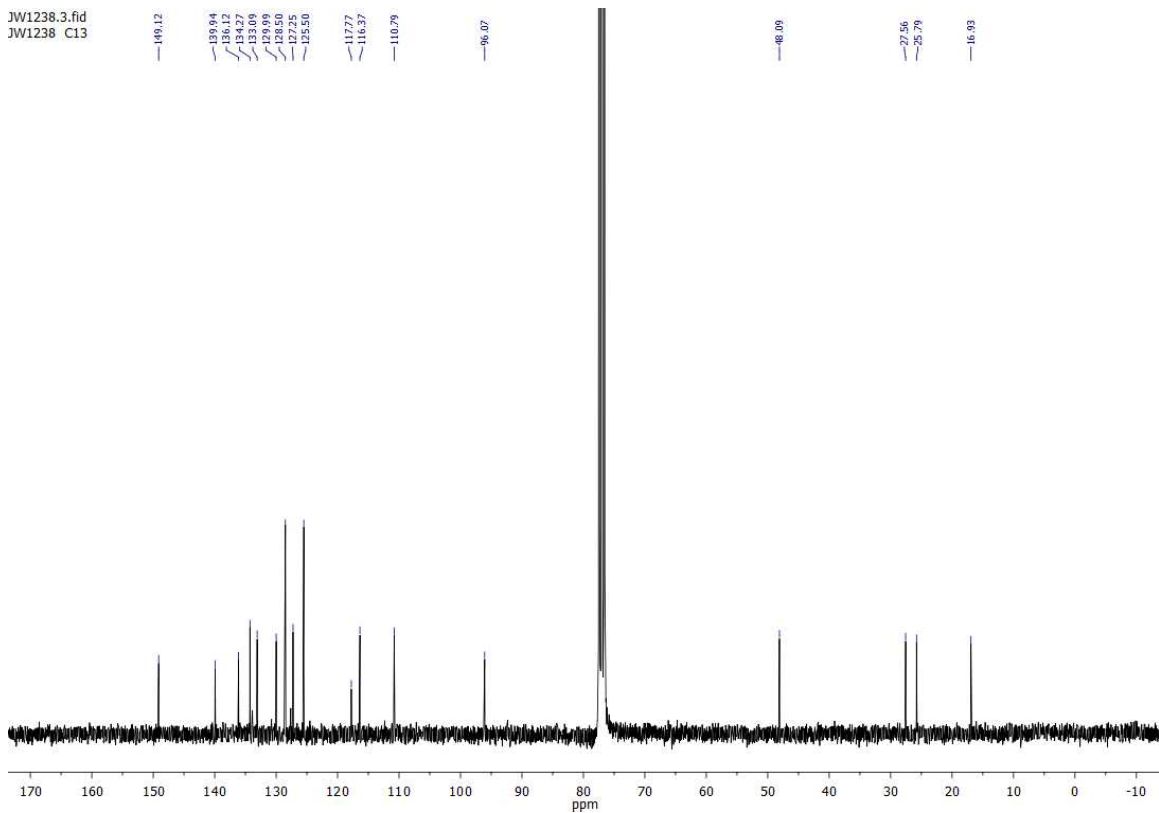

JW1299.1.fid  
JW1299 H1

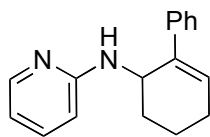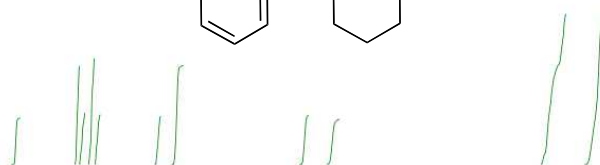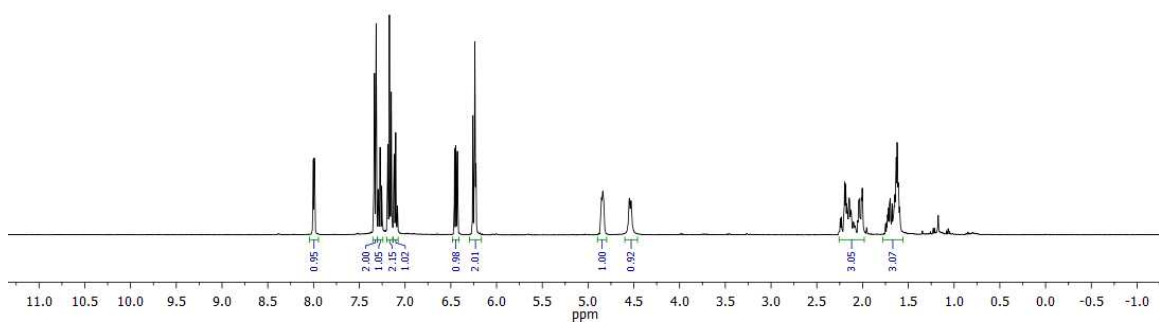

JW1299.2.fid  
JW1299 C13

157.51  
147.93  
140.12  
137.34  
137.13  
129.16  
128.37  
127.01  
125.61  
112.48  
107.56  
46.35  
28.55  
26.02  
17.44

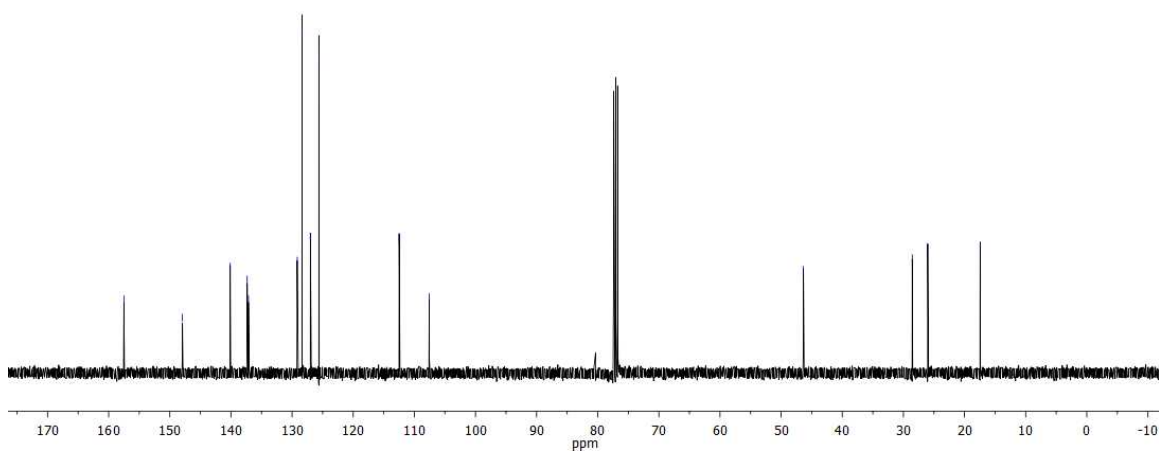

JW1188-1-2.1.fid  
JW1188-1-2 after column

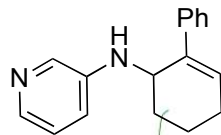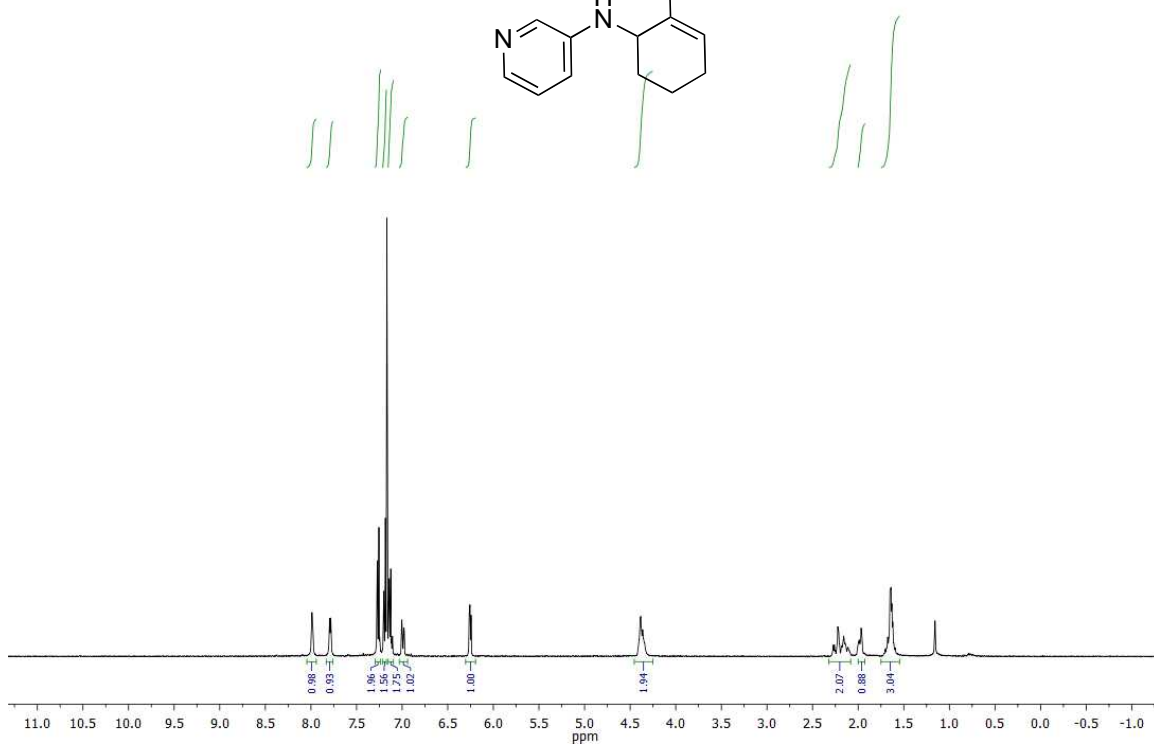

JW1188-1 C13.2.fid  
JW1188-1 C13

143.40  
130.08  
136.77  
135.55  
129.59  
129.40  
125.63  
124.16  
119.10

81.00

27.55  
26.08

17.26

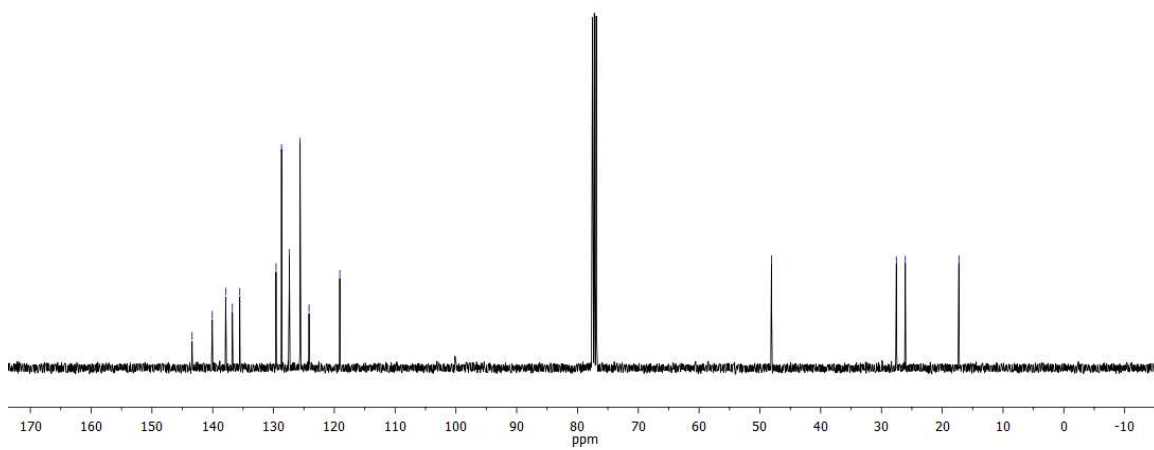

JW1239-2.5.fid  
JW1239-2 H1

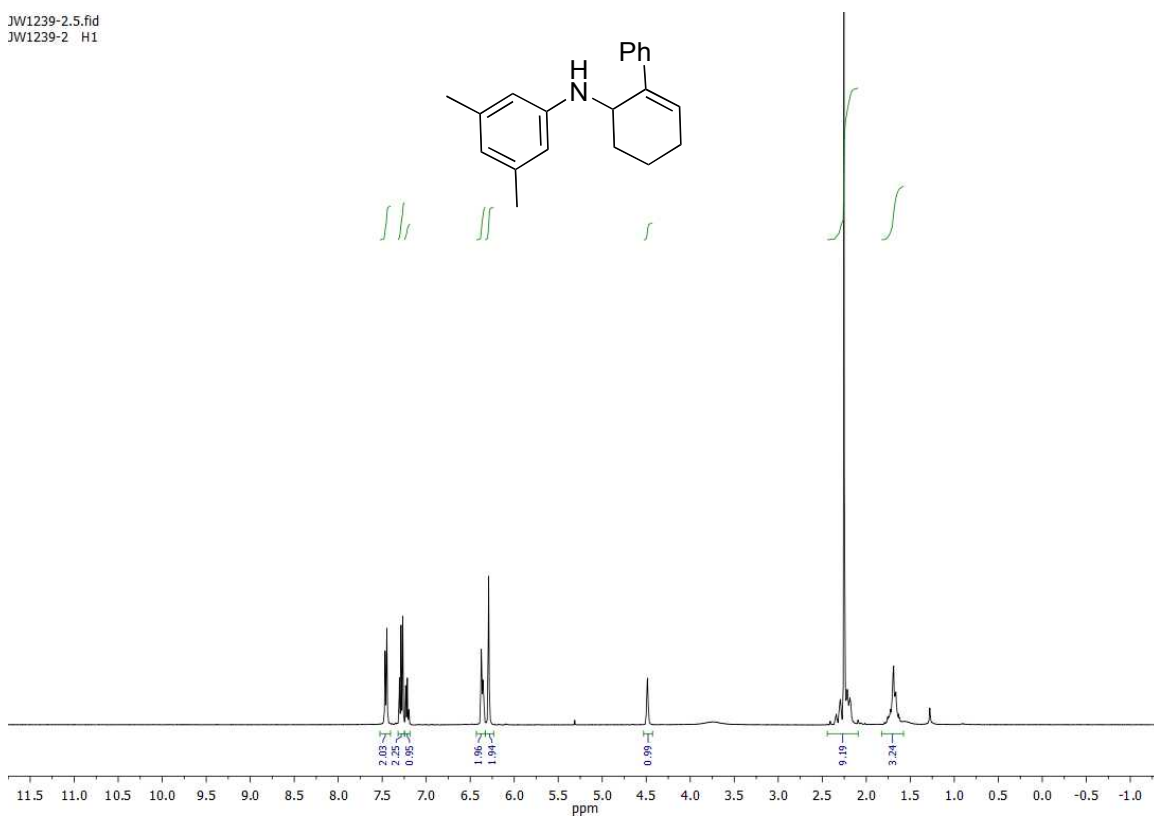

JW1239-2.102.fid  
pure strychnine

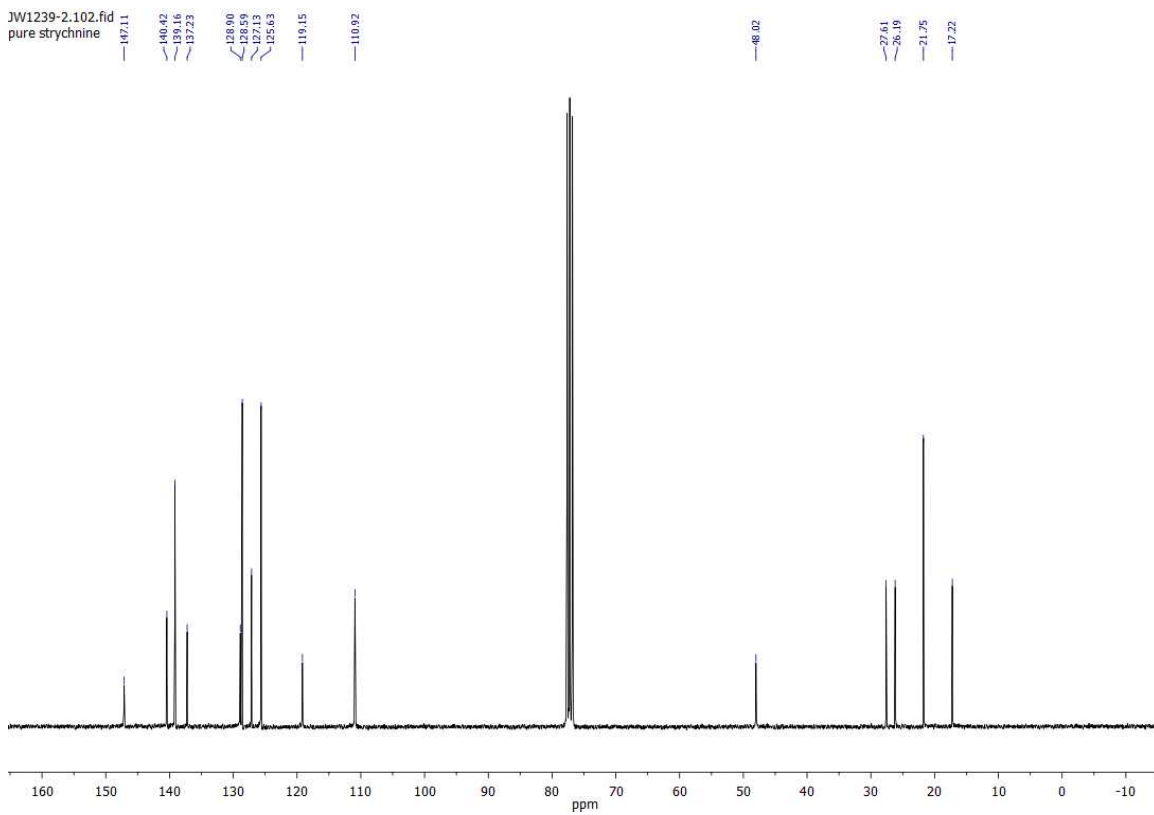

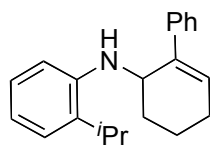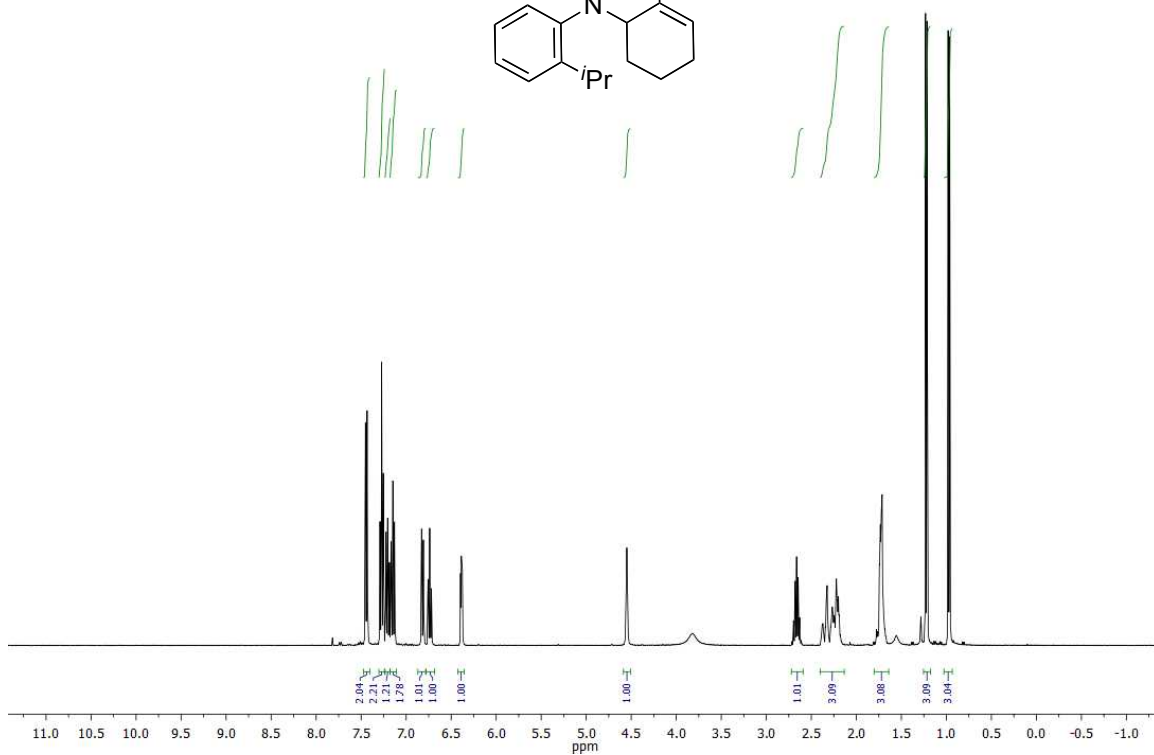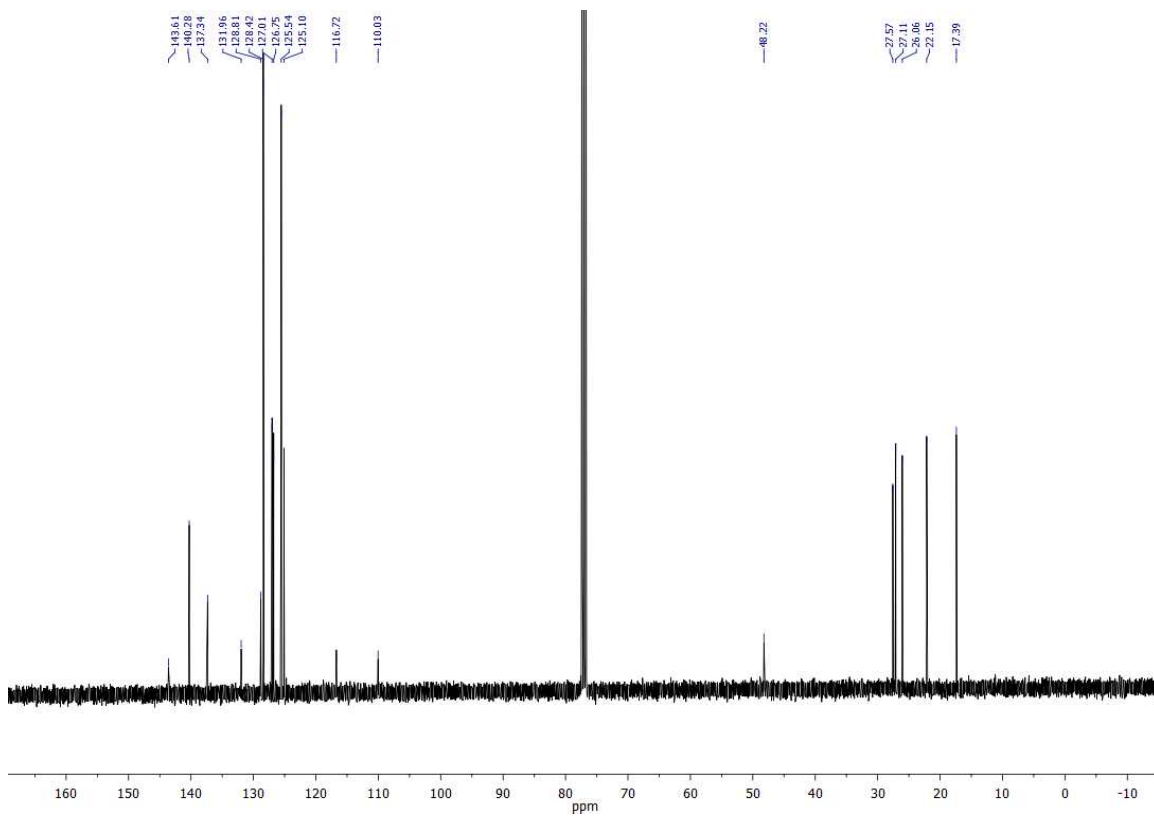

JW1184-1-2.1.fid  
JW1184-1-2 after column

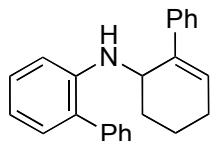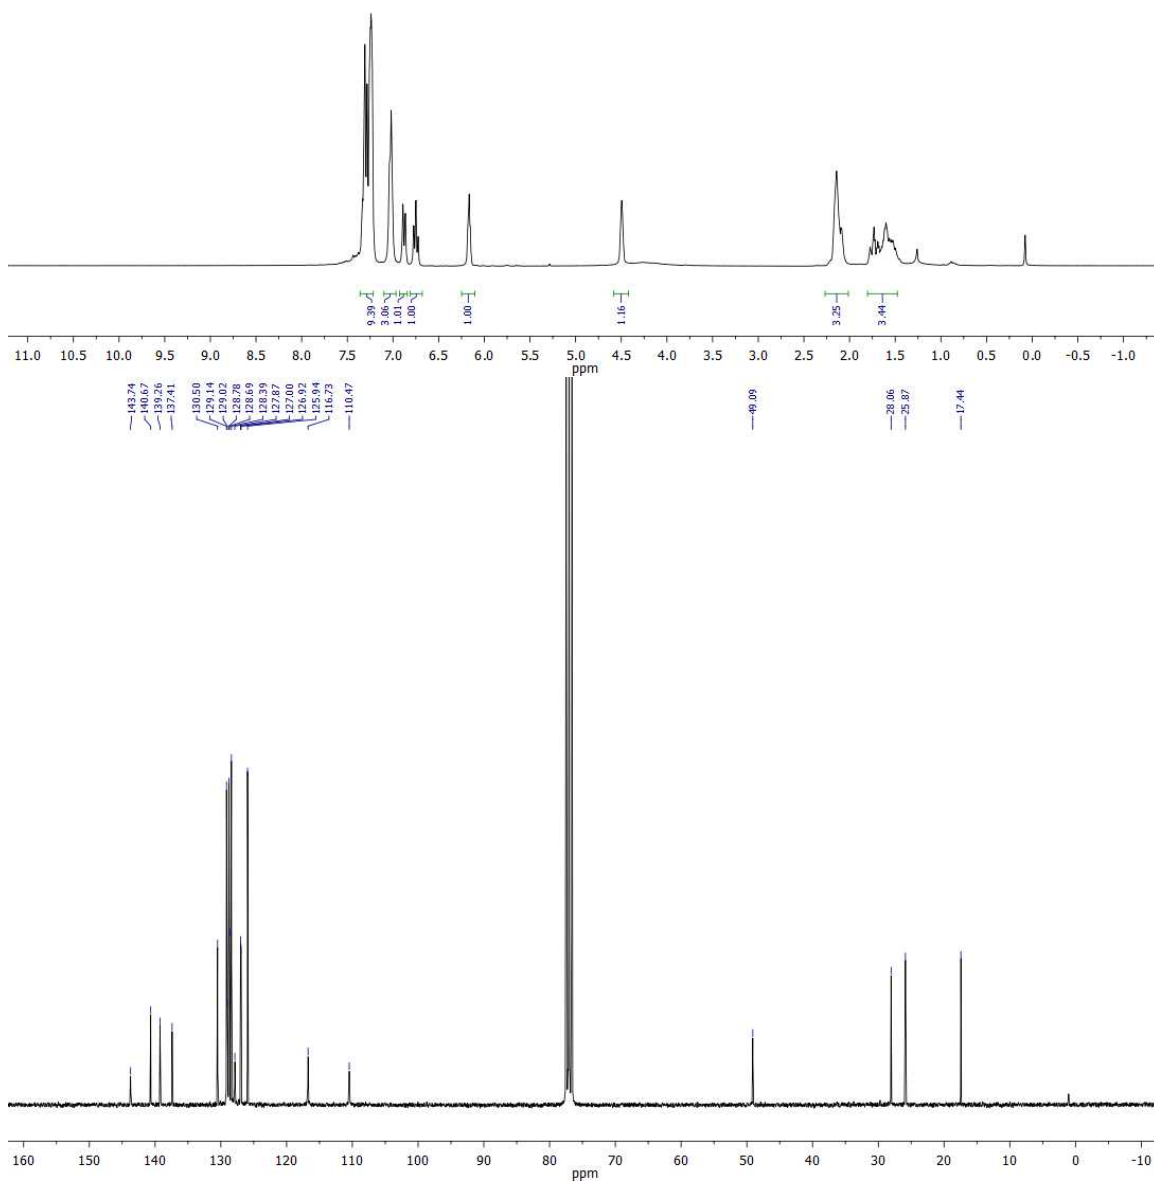

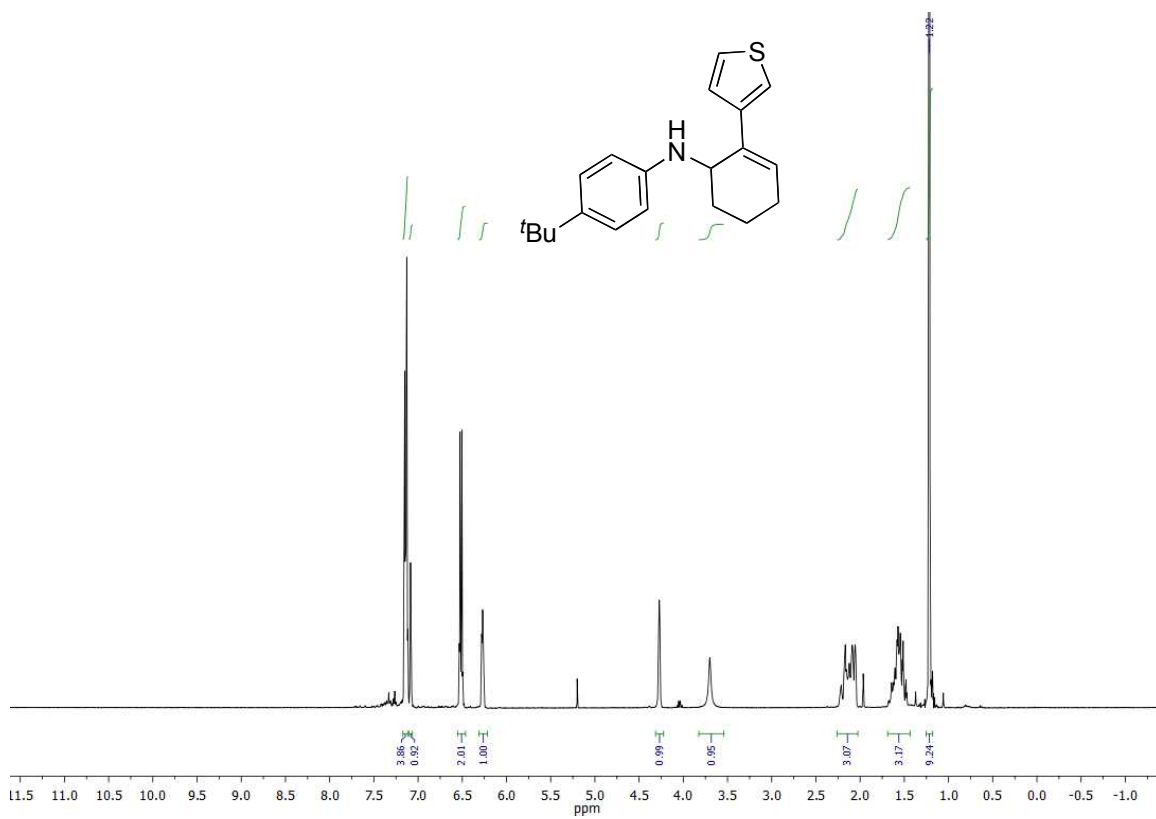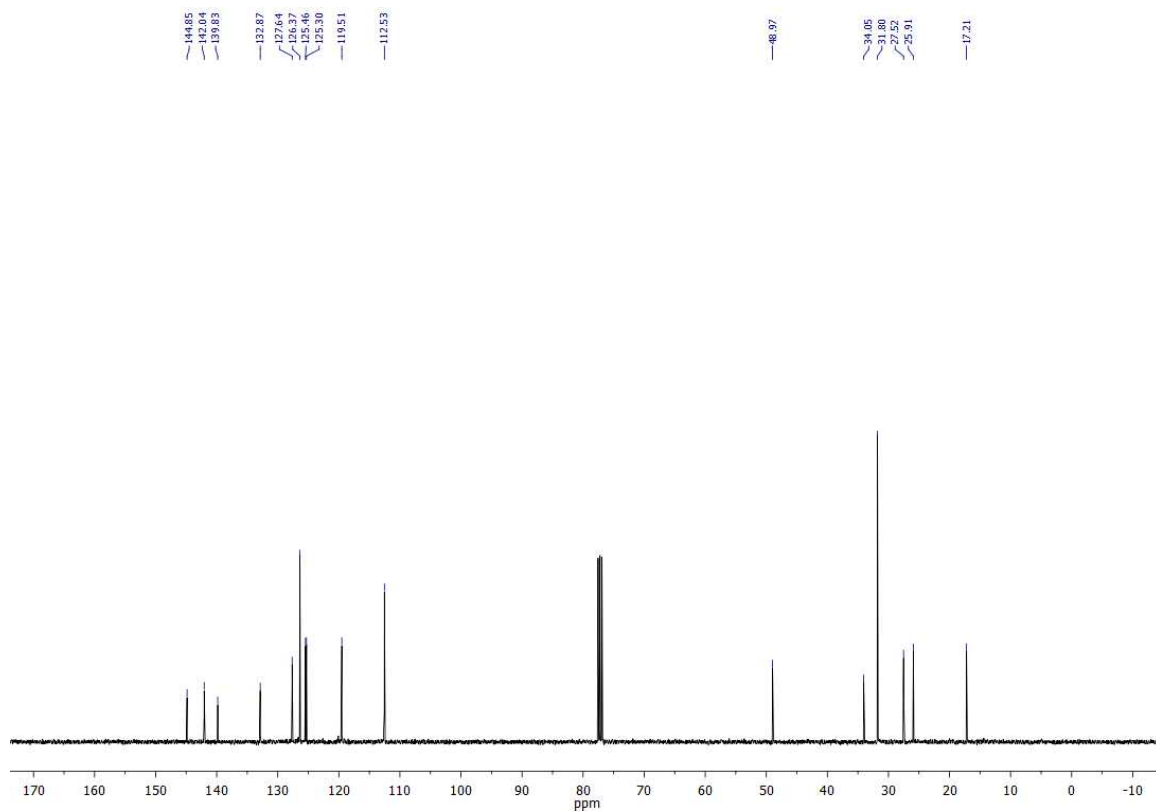

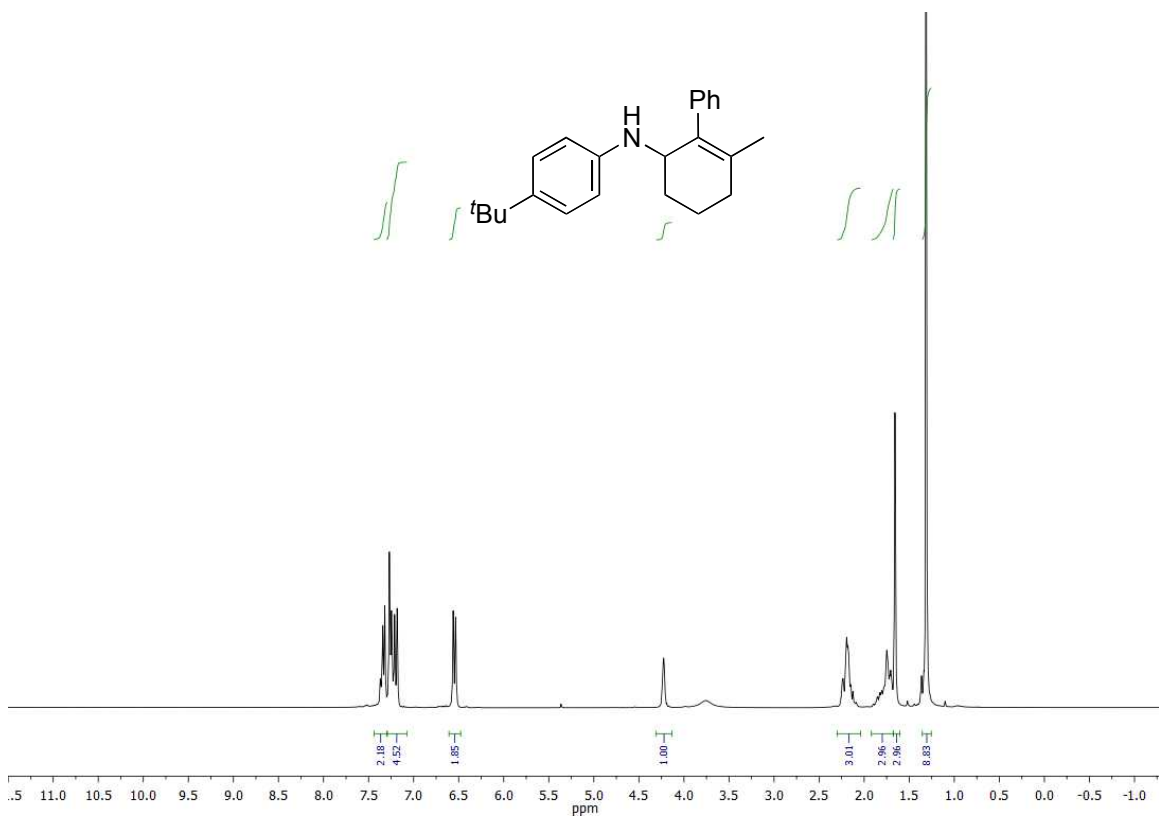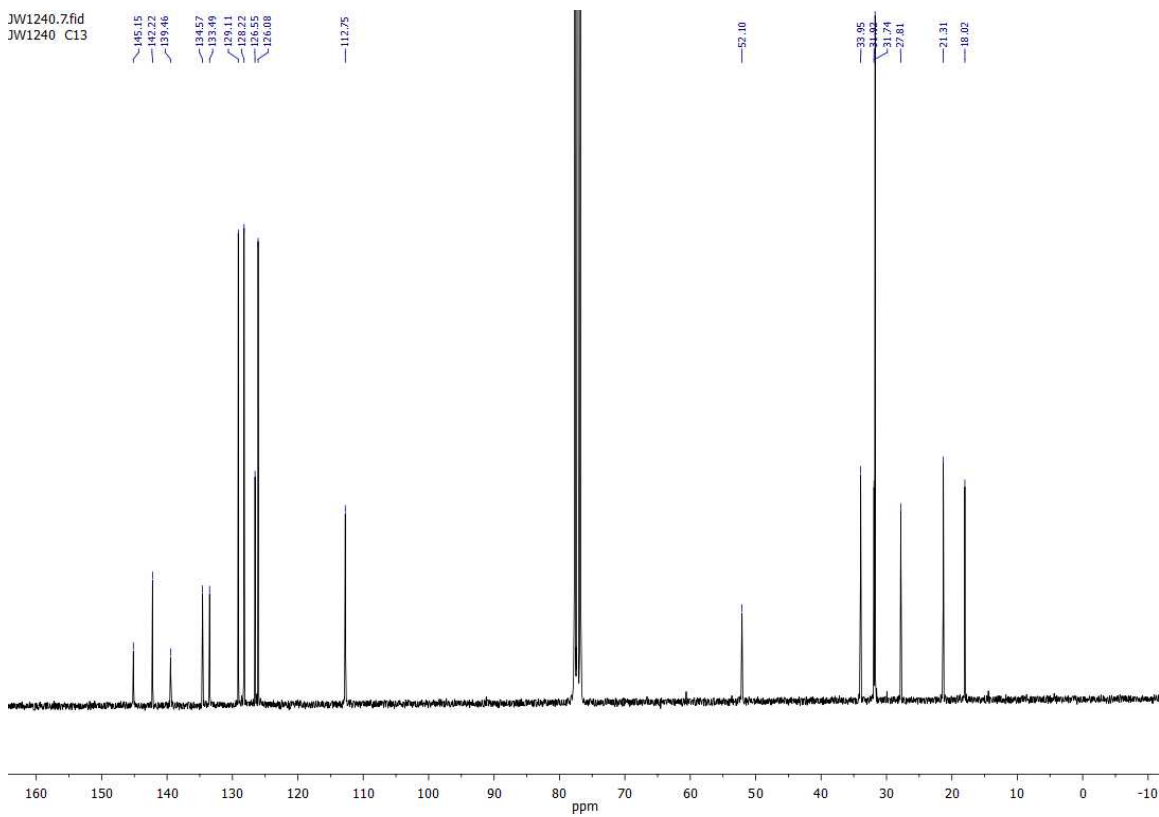



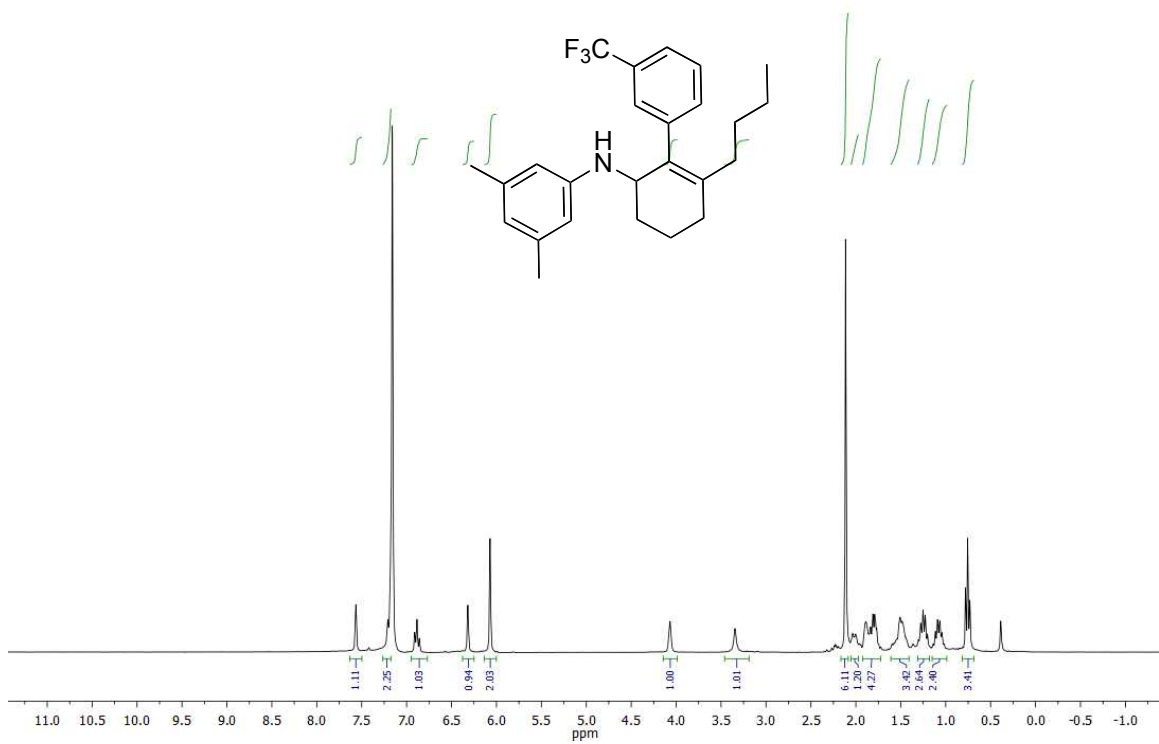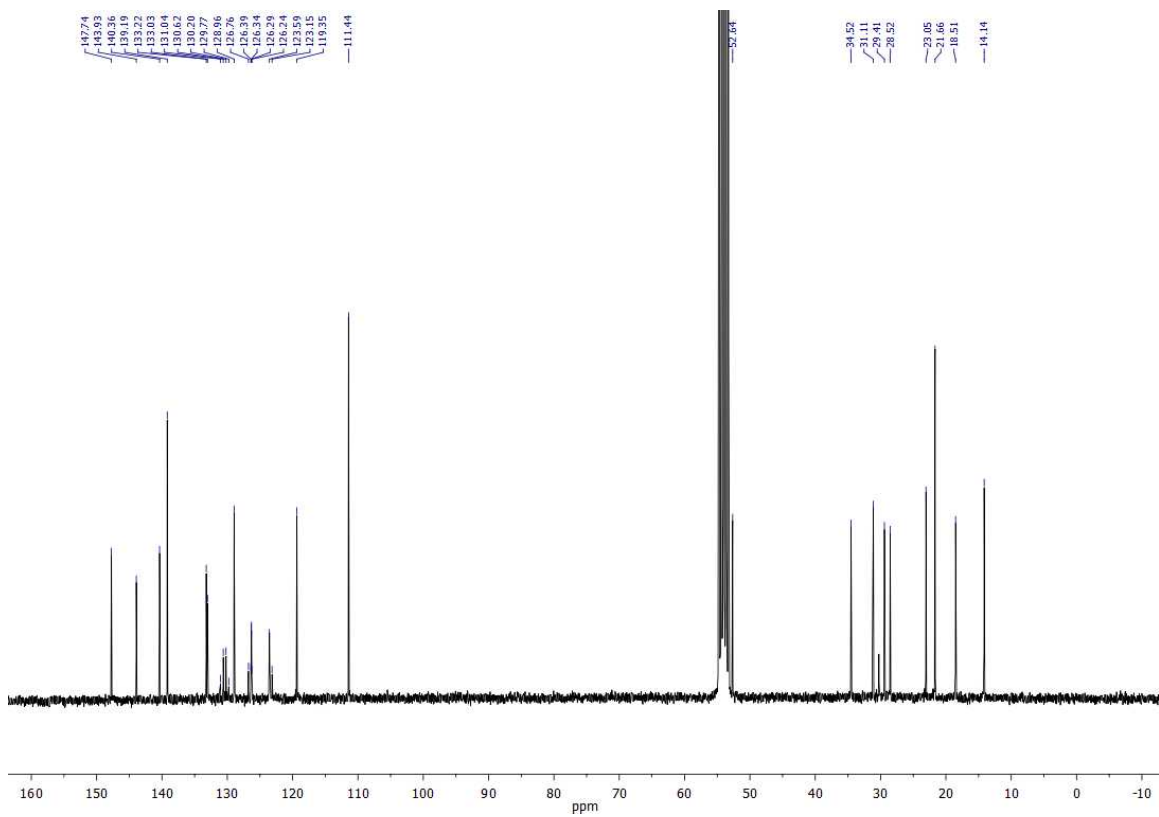

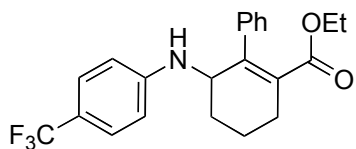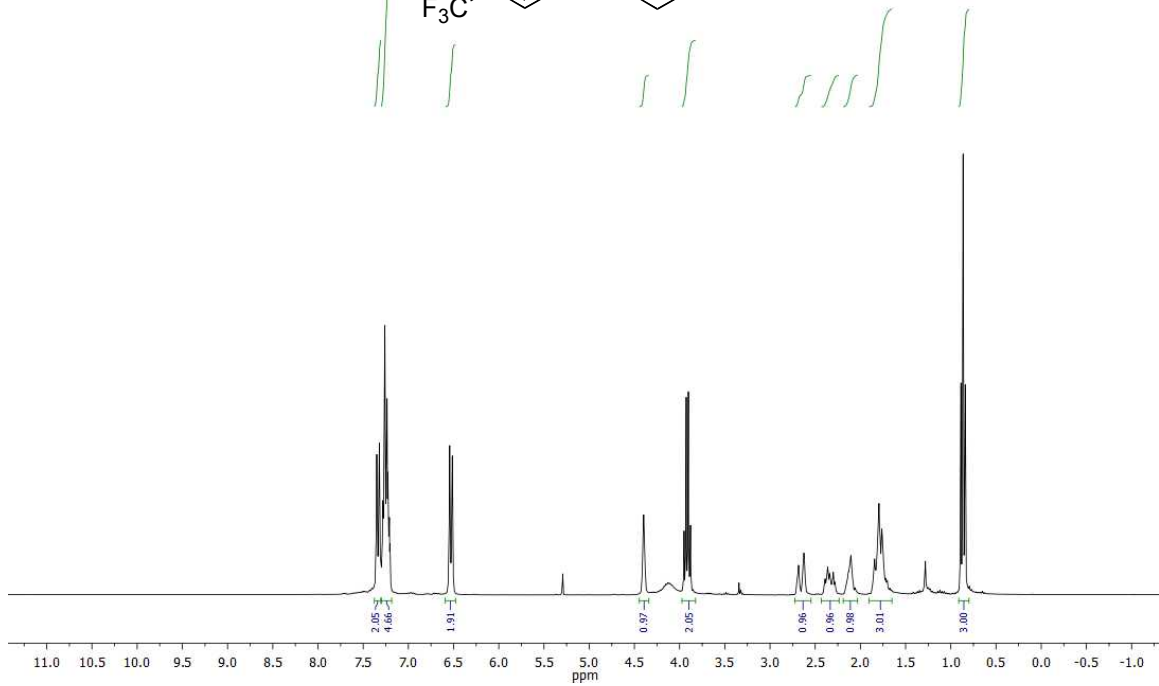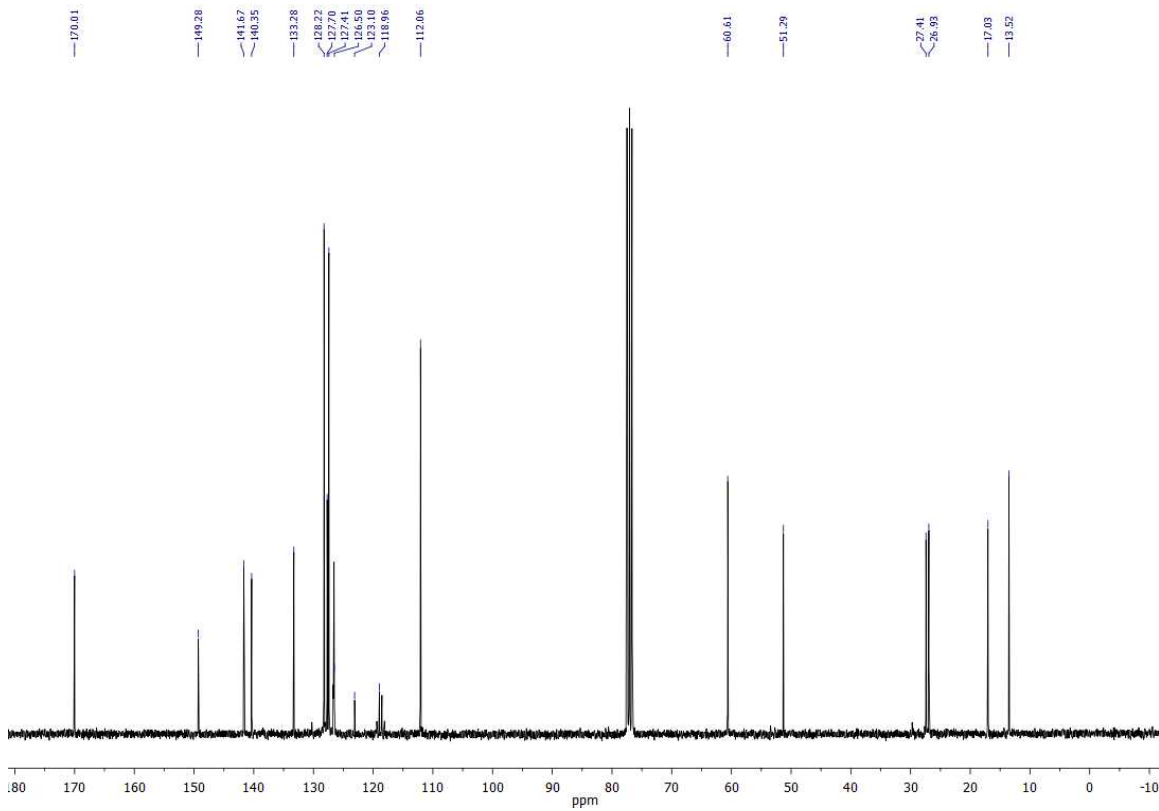

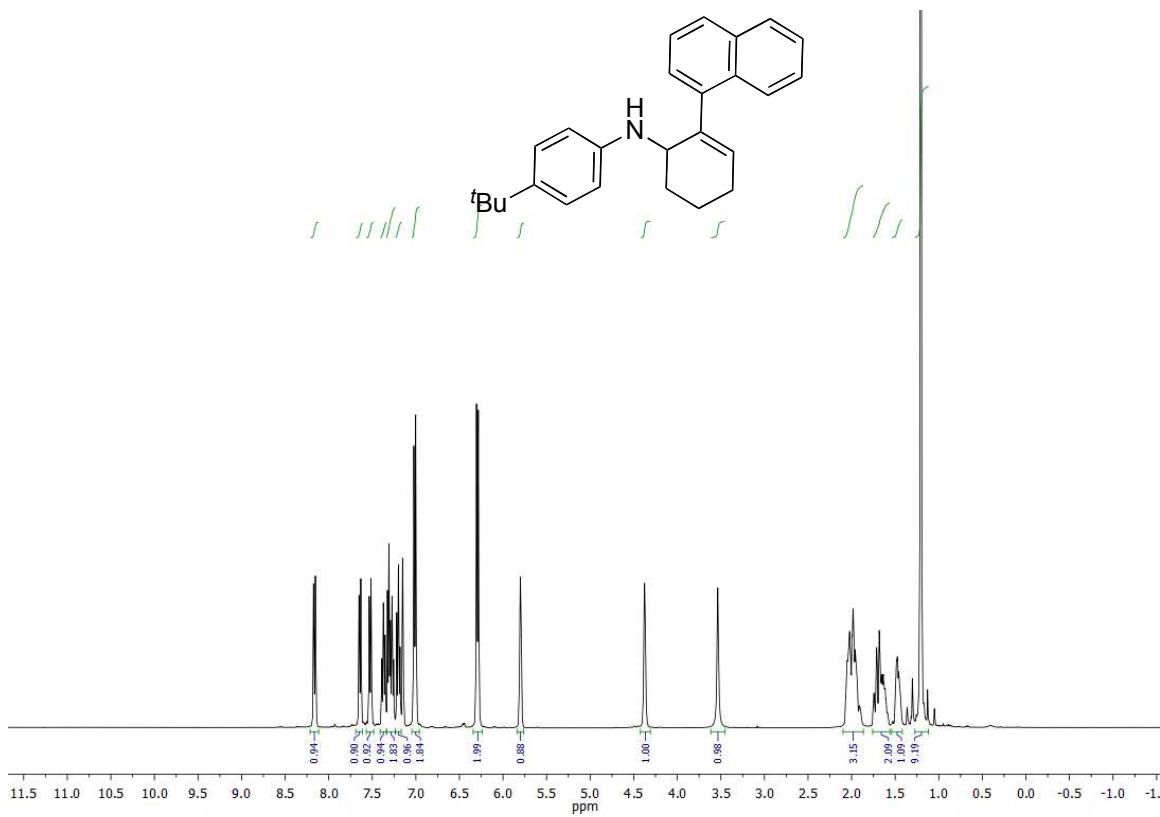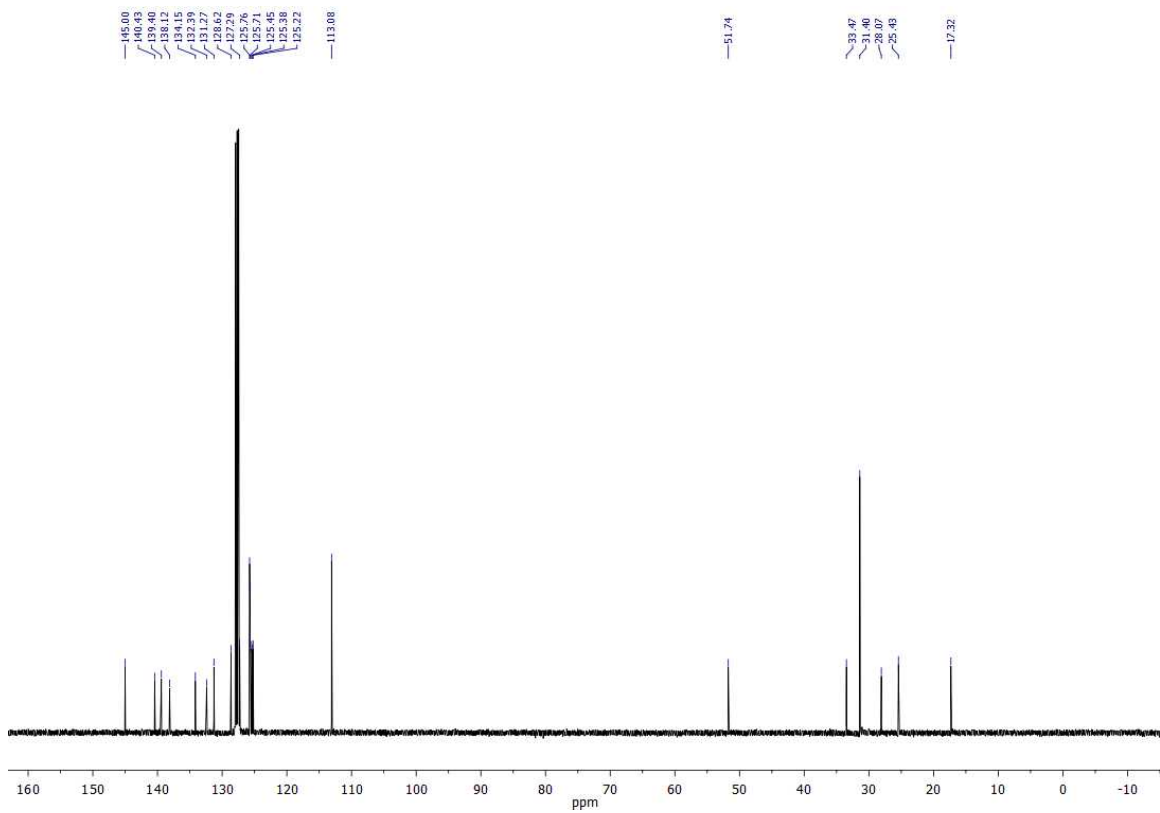

JW2062.2.fid  
JW2062 H1

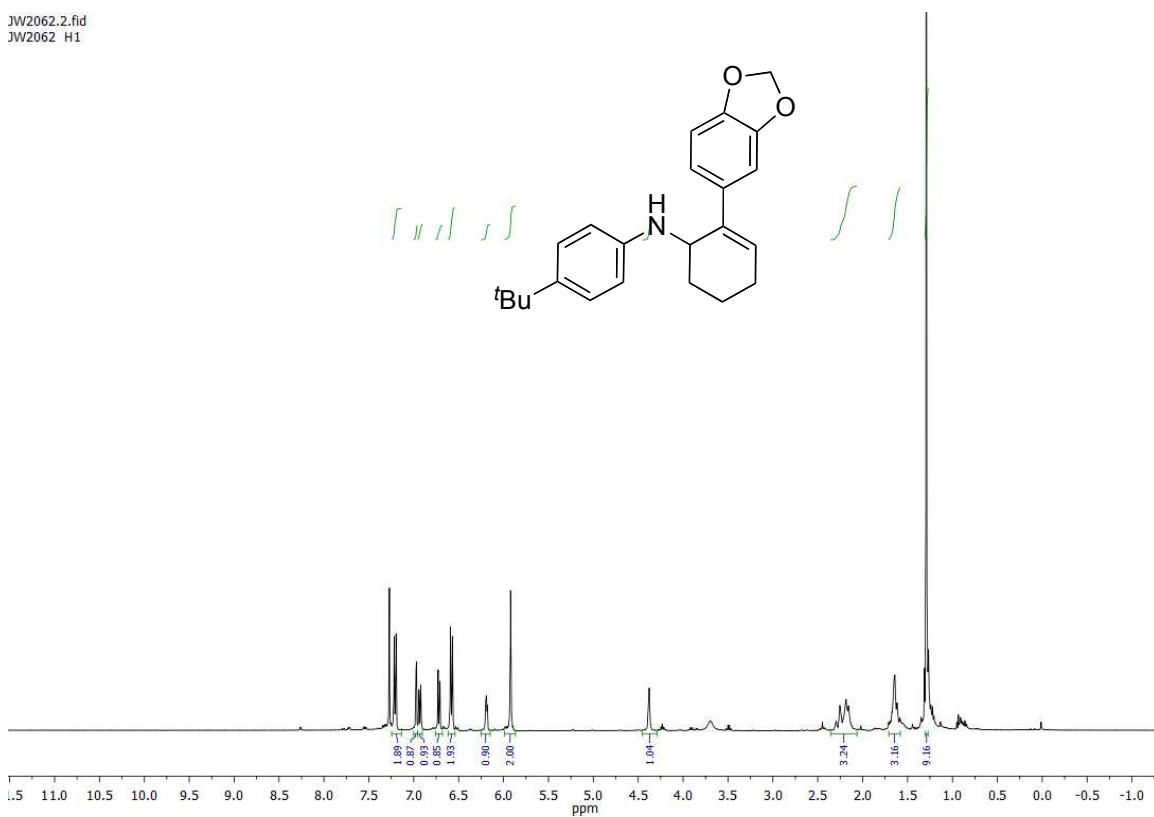

JW2062 C13.1.fid  
JW2062 C13

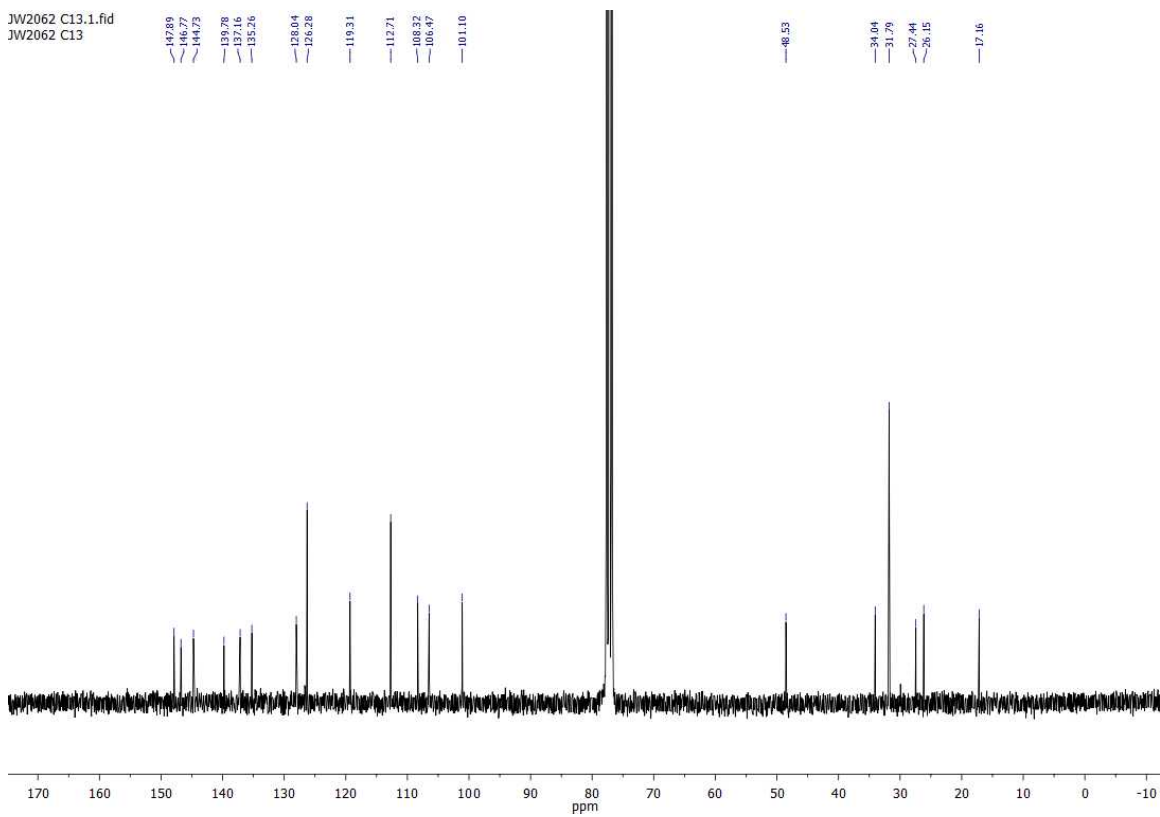

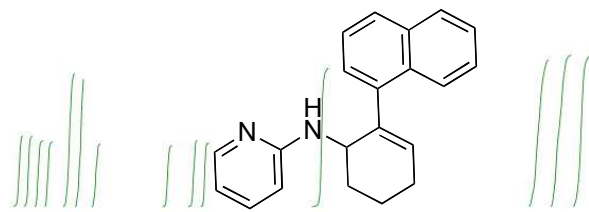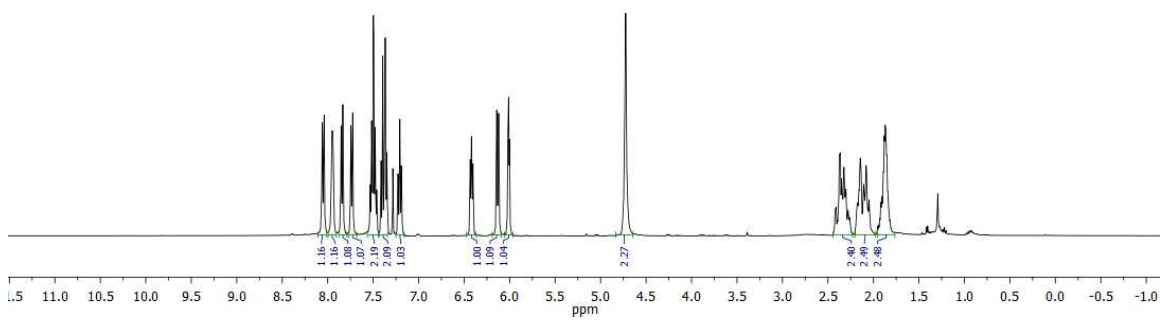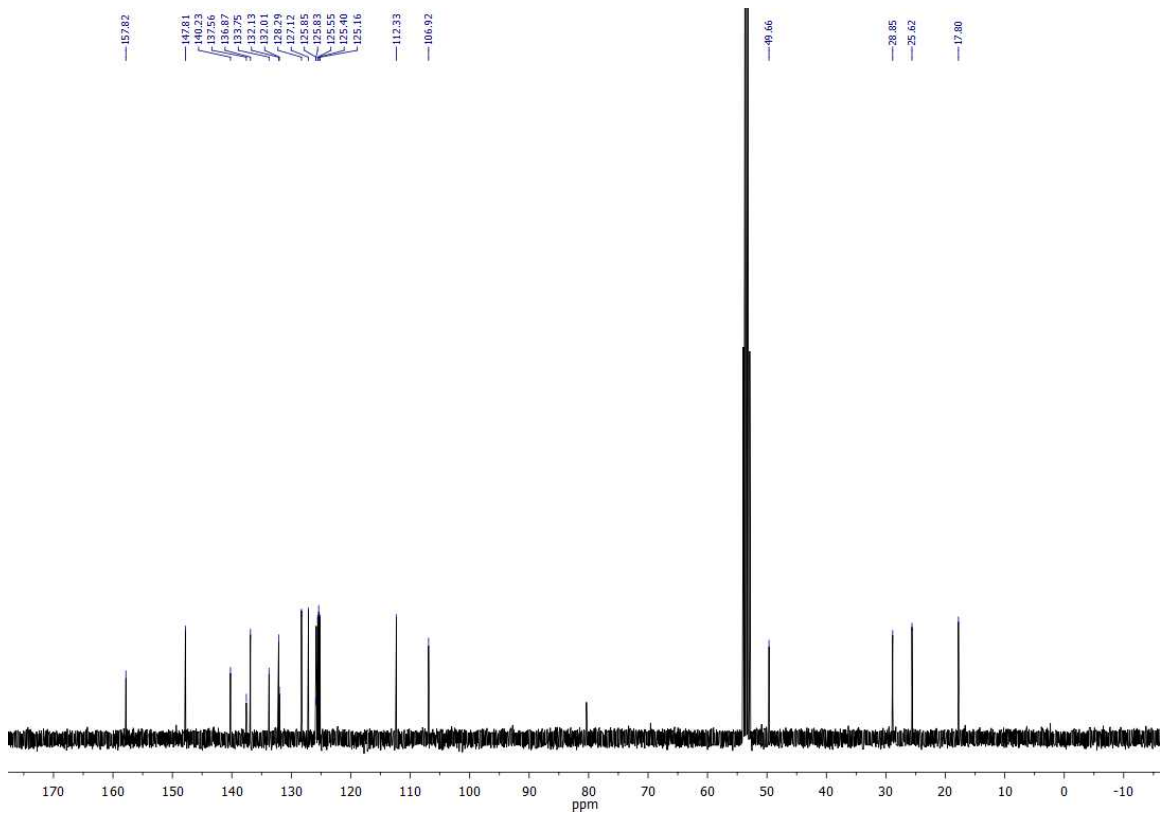

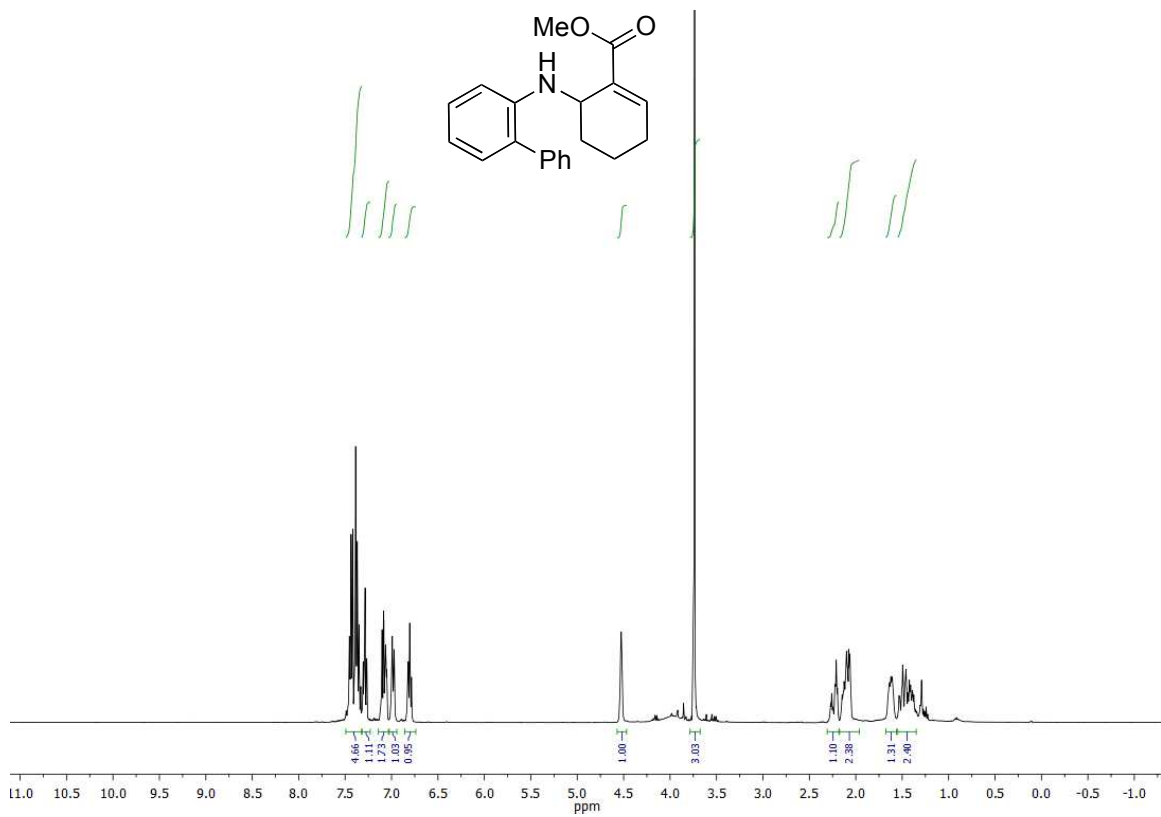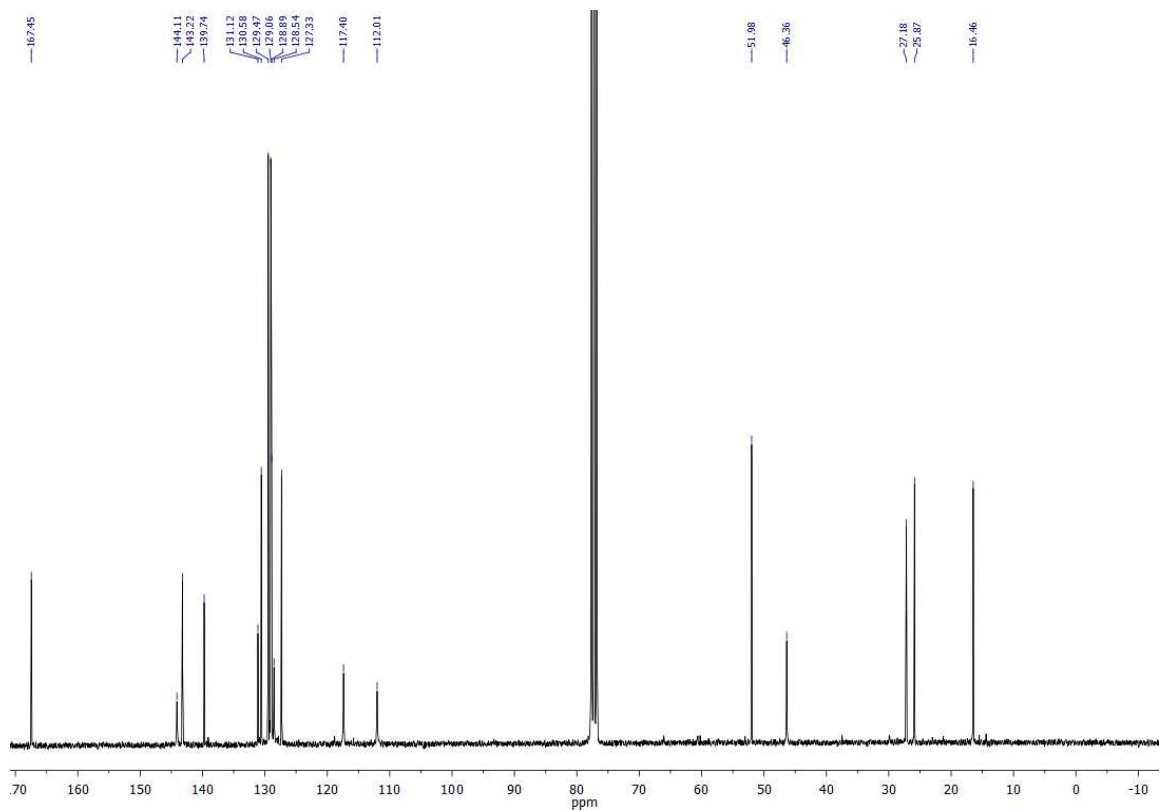

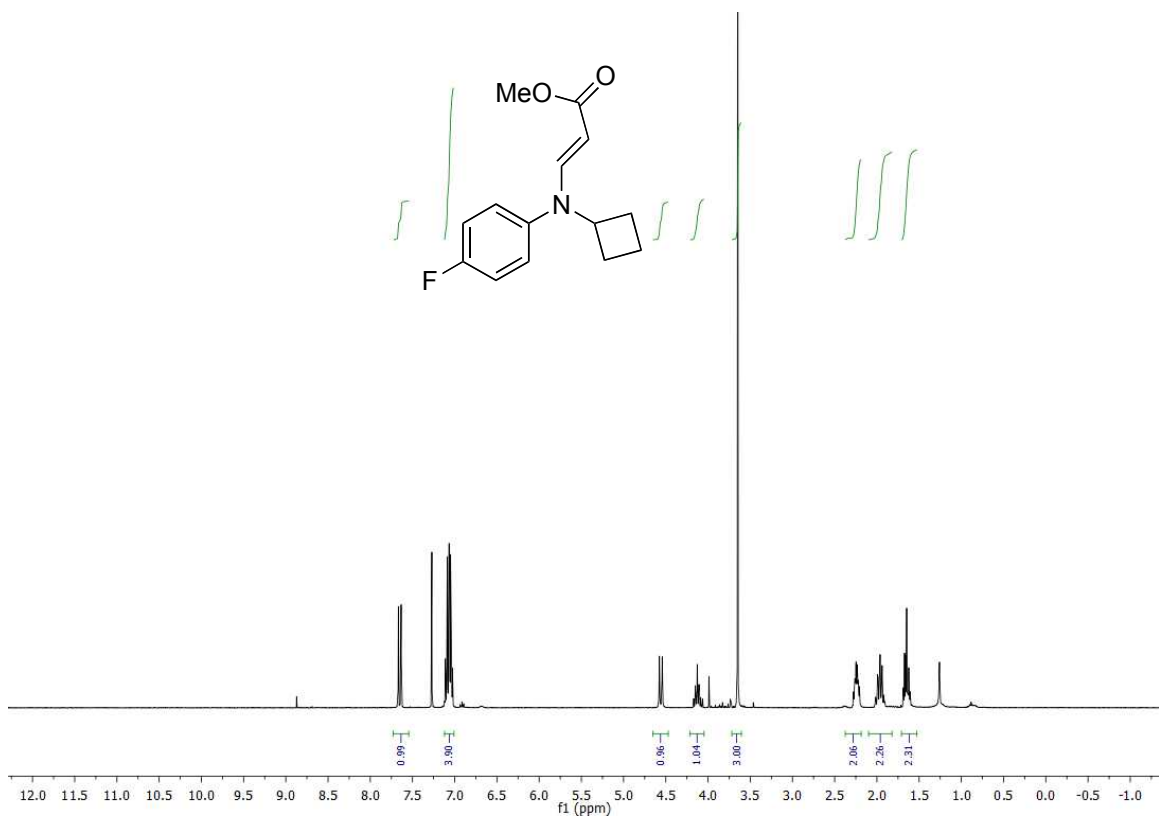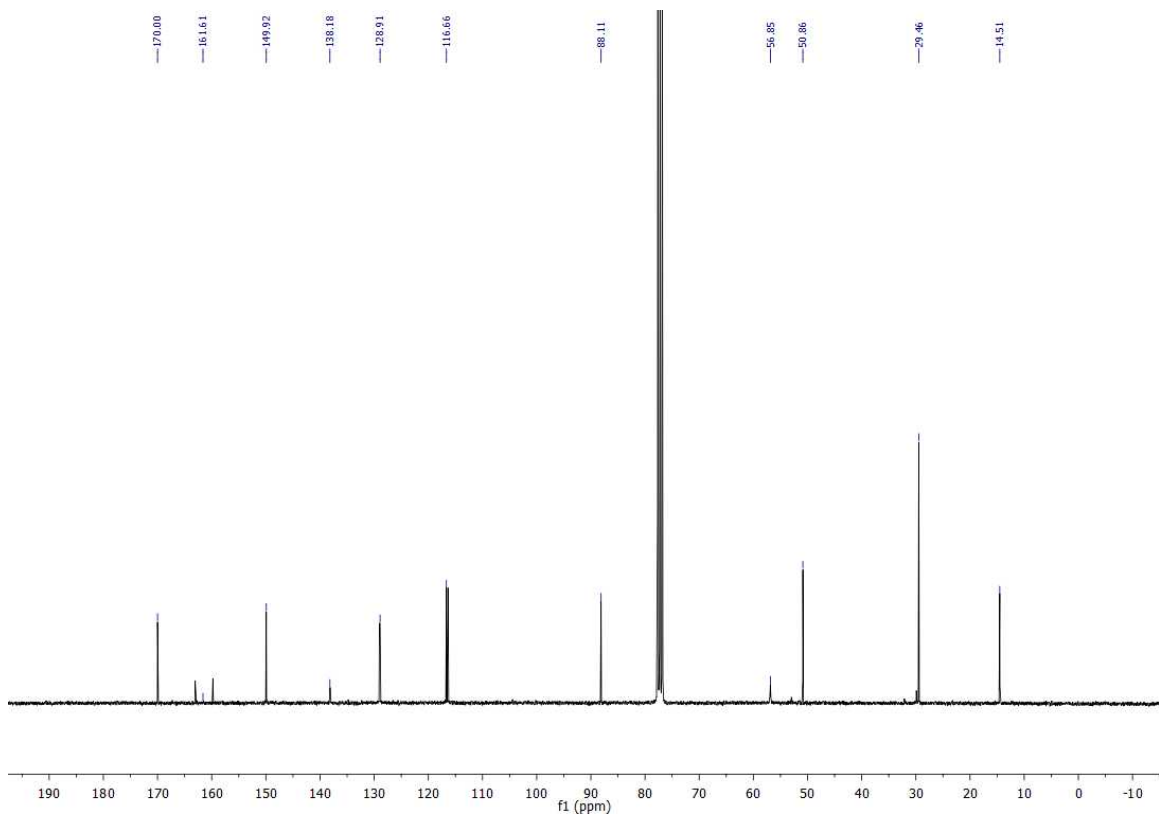

JW2019 F2.7.fid  
JW2019 F2 down Spot

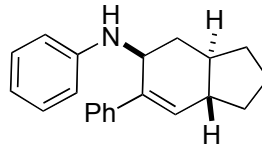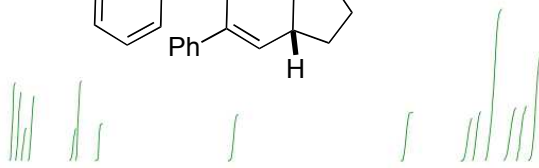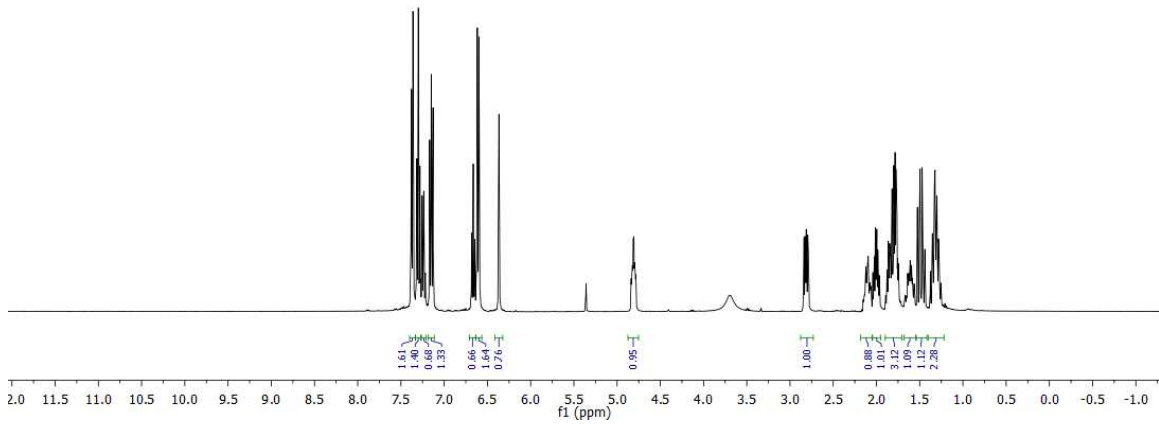

JW2019 F2.8.fid  
JW2019 F2 down spot

149.08  
141.33  
140.02  
132.84  
129.69  
129.55  
126.94  
117.40  
113.52  
53.43  
46.00  
44.19  
36.93  
30.32  
30.23  
27.68

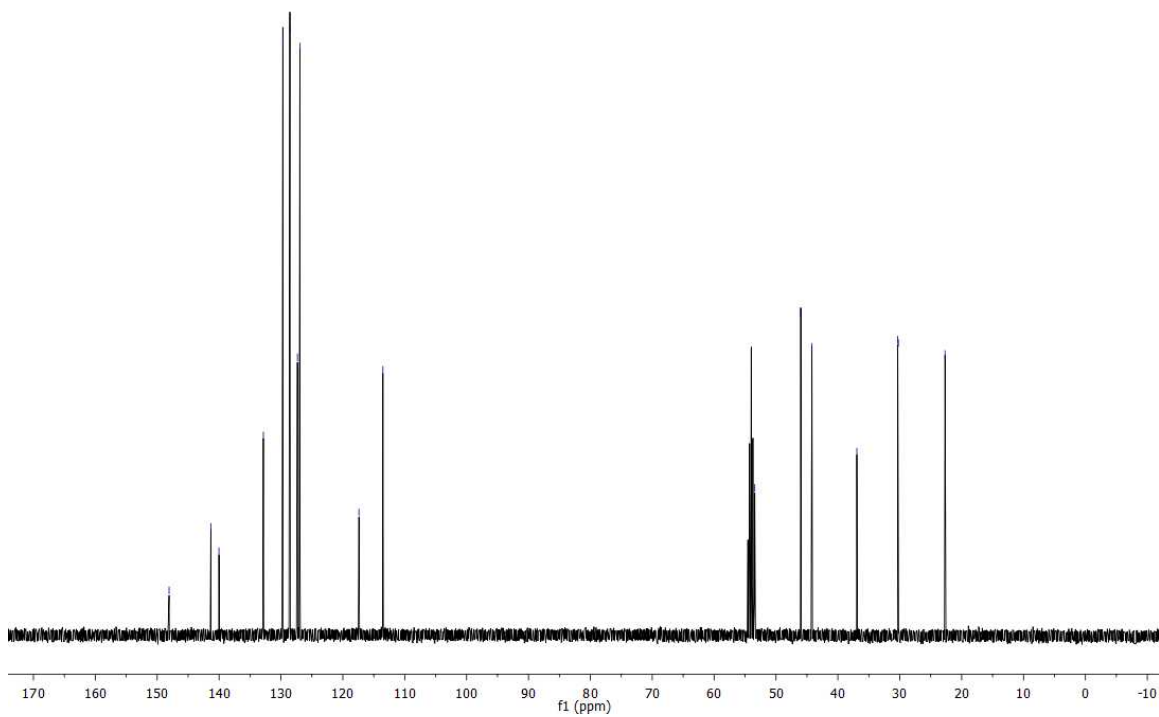



# HSQC

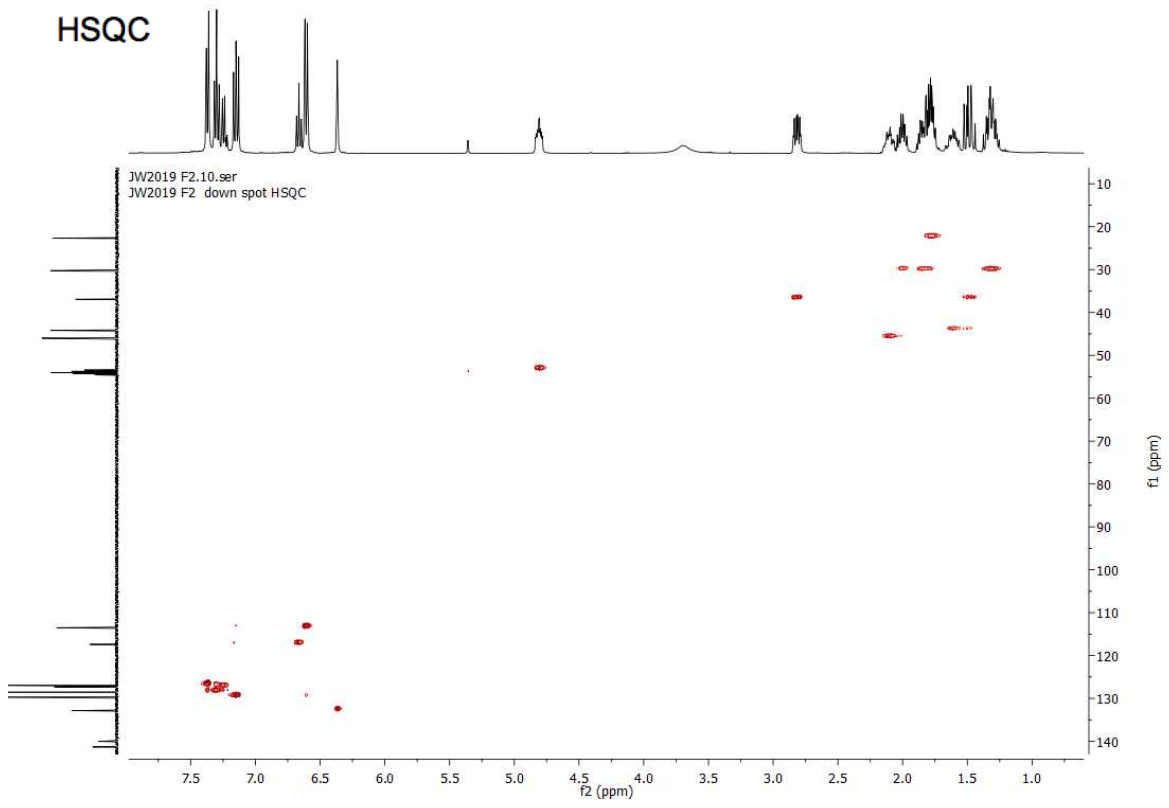

# COSY

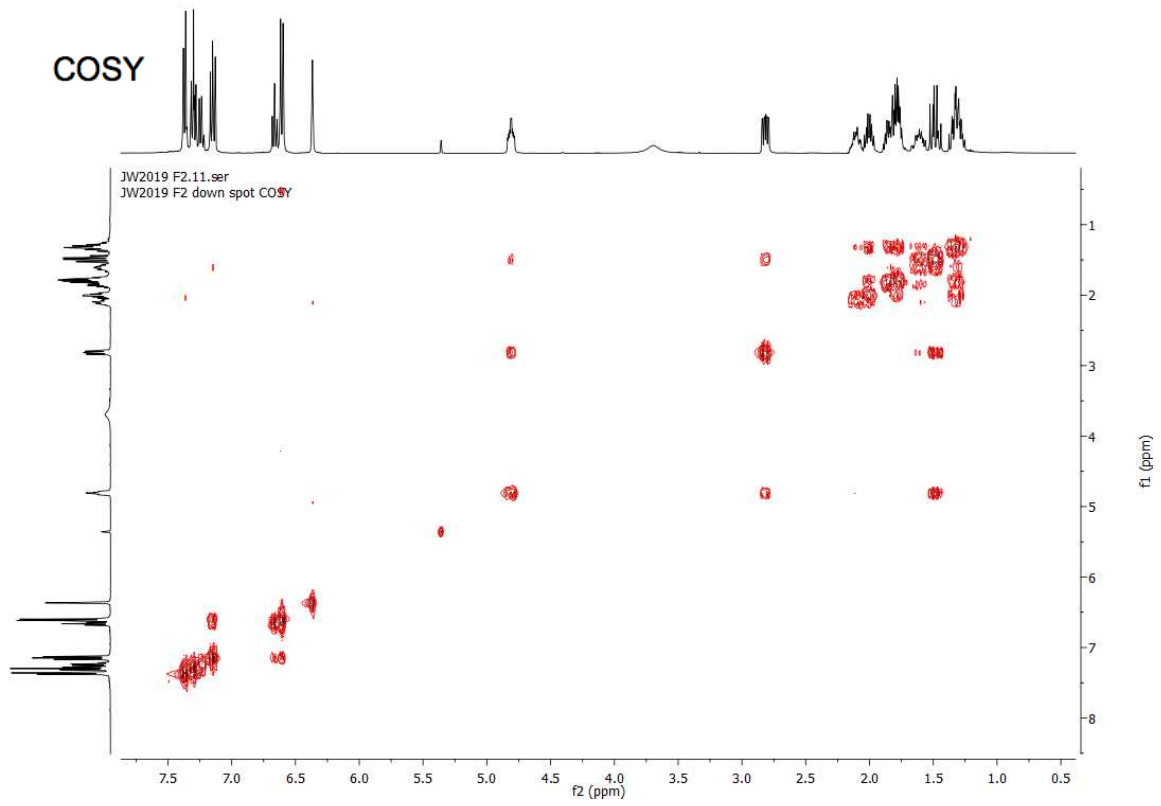

# NOESY

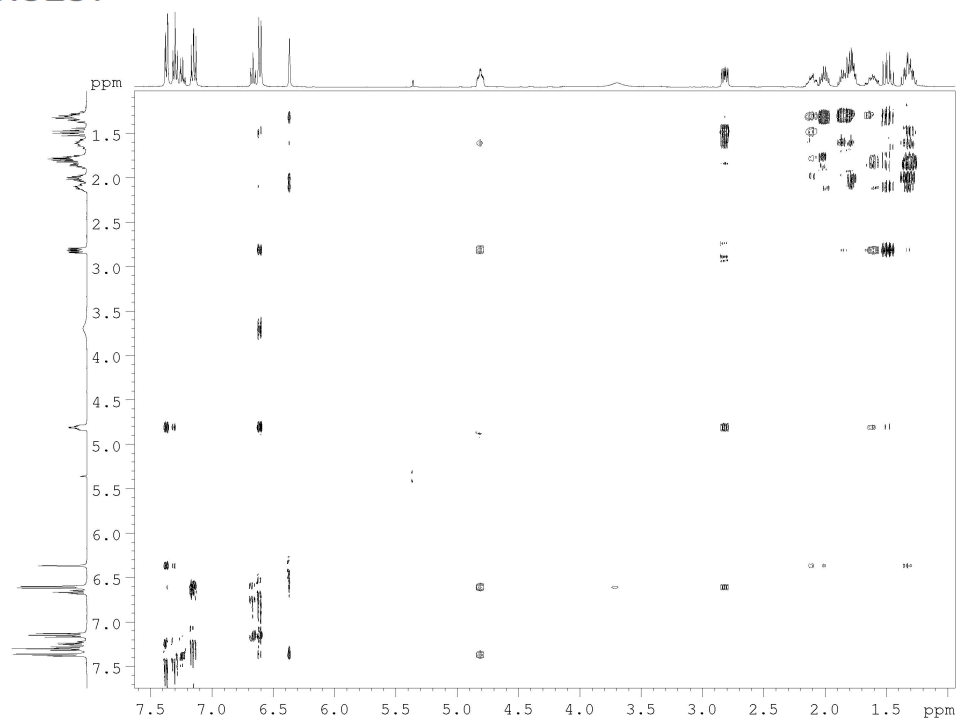

# HMBC

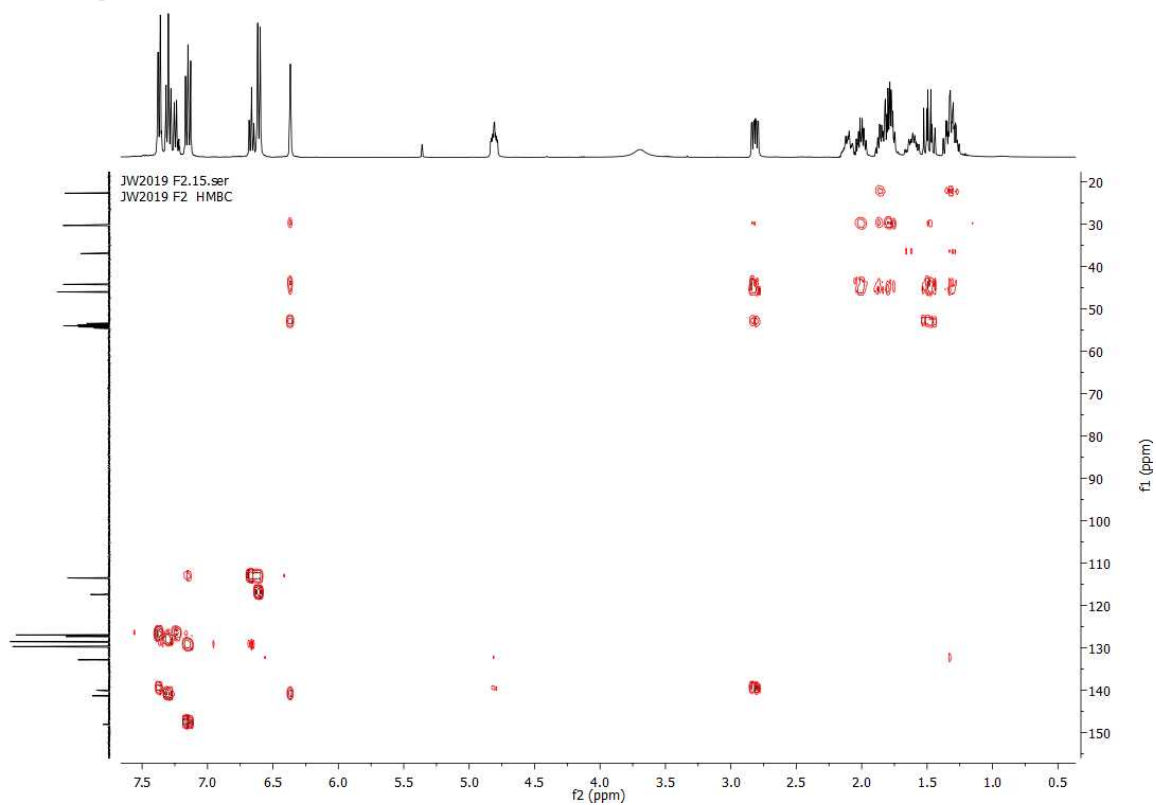

JW2054-F2.2.fid  
JW2054-F2

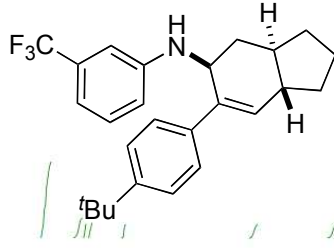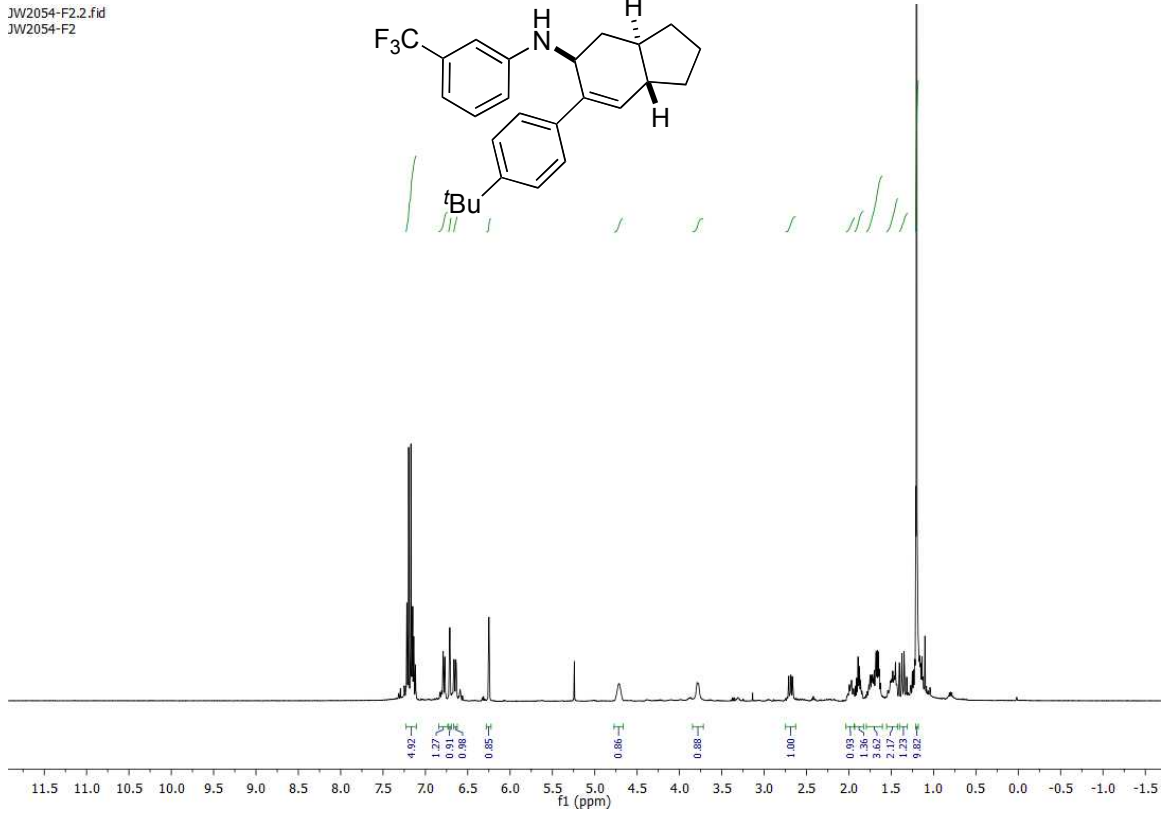

JW2054-F2.4.fid  
JW2054-F2 c13

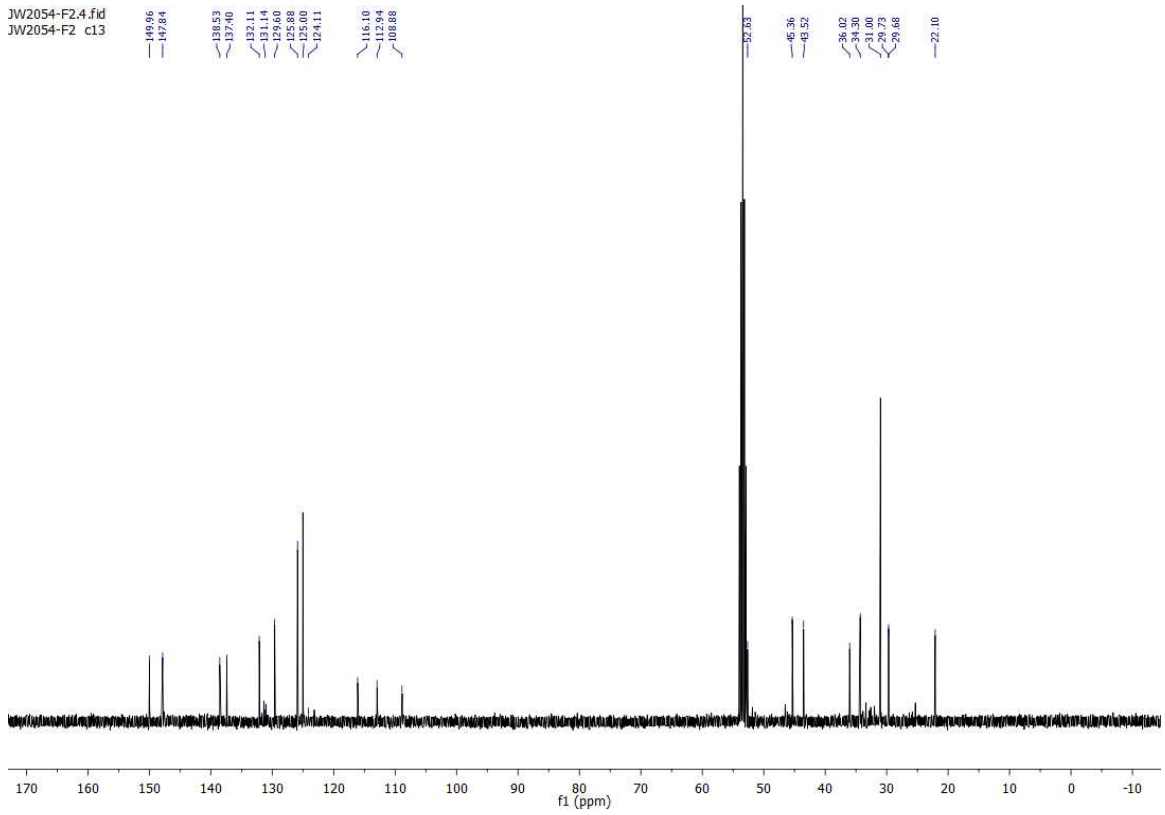

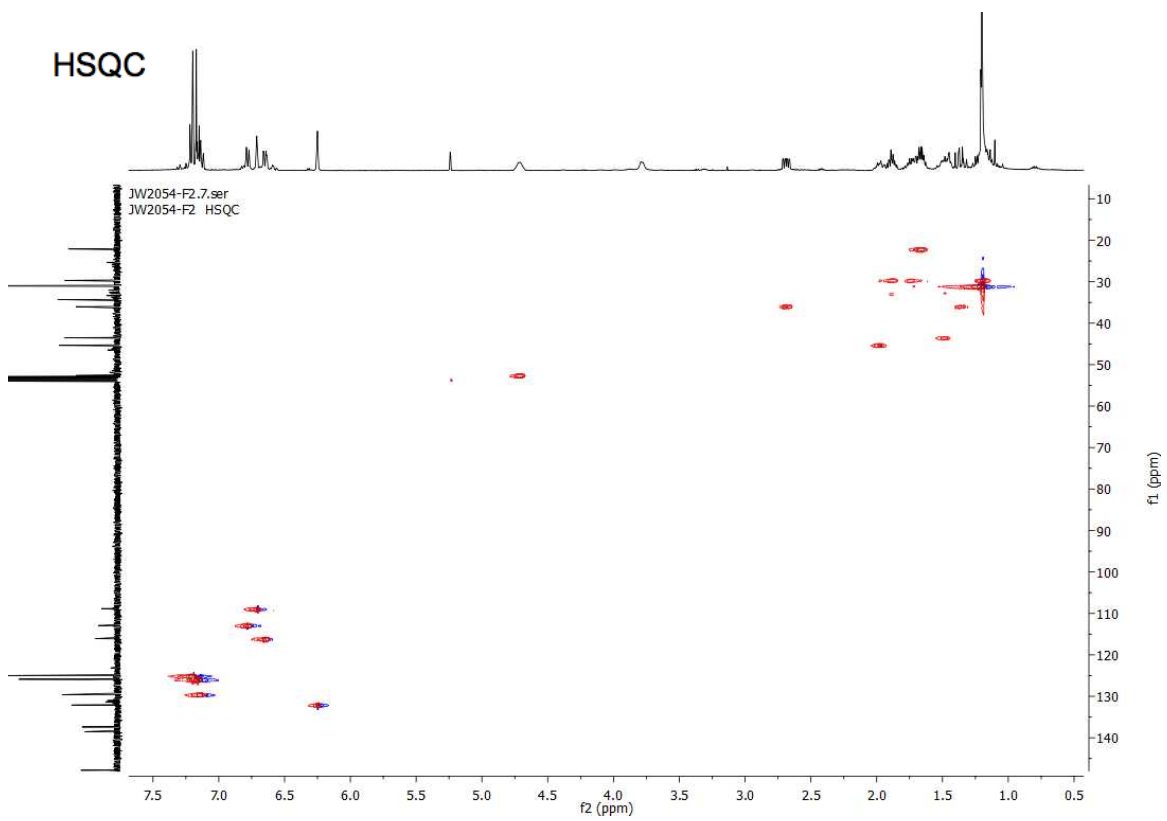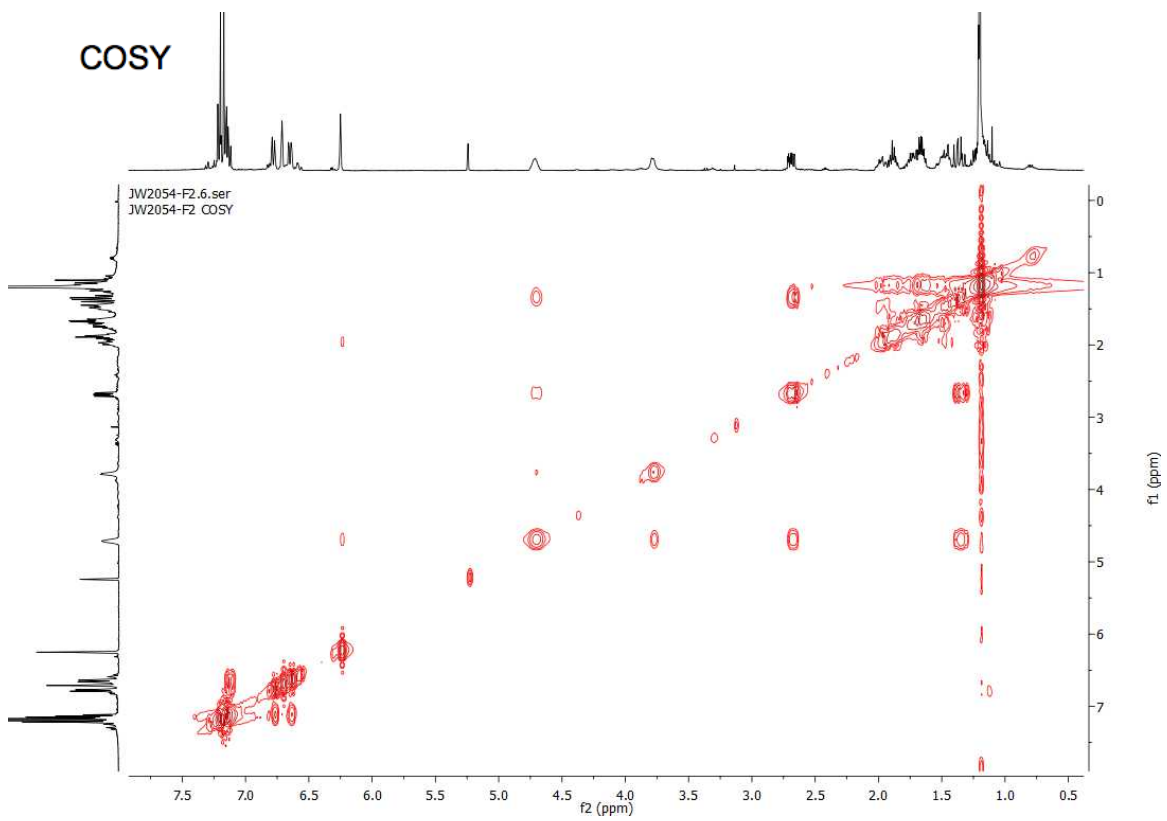

# NOESY

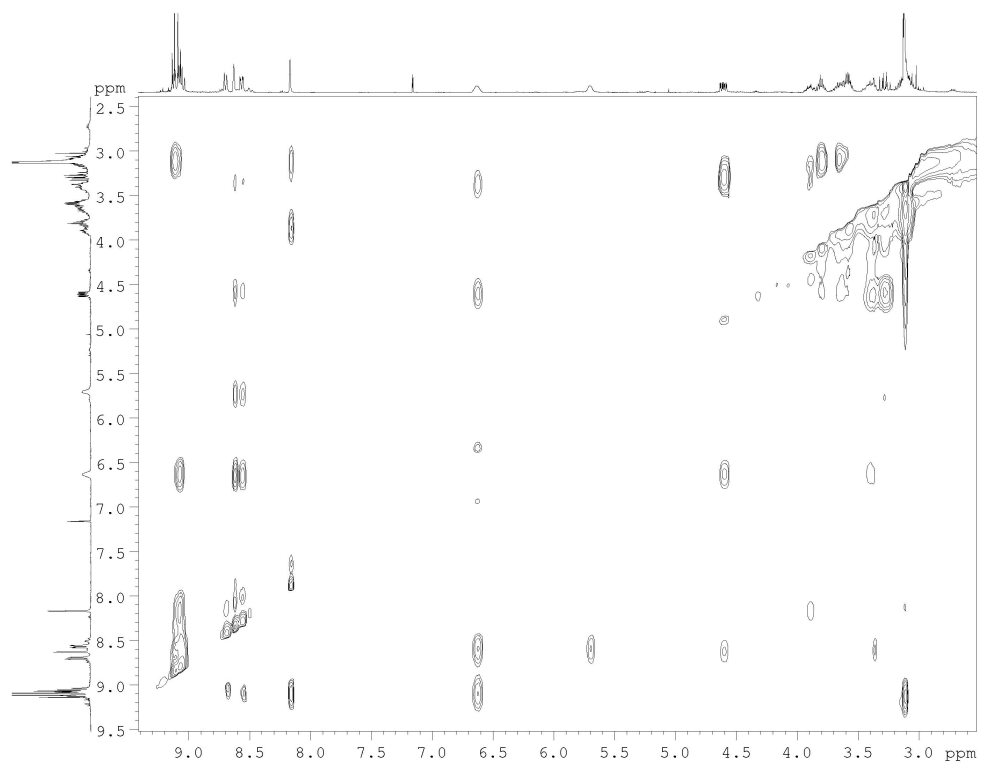

JW2024-2.6.fid  
JW2024-2 H1

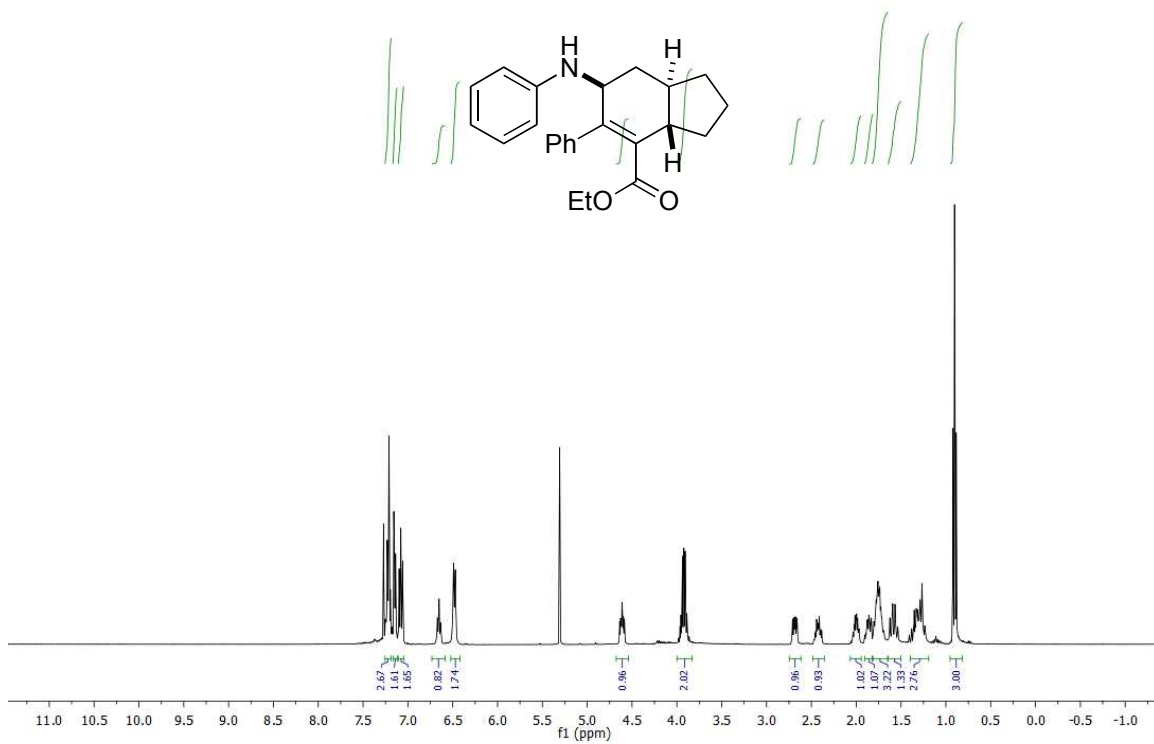

JW2024-2.3.fid  
JW2024-2 C13

- 169.31
- 147.18
- 142.69
- 139.41
- 135.55
- 129.16
- 128.15
- 127.82
- 127.59
- 117.56
- 113.65
- 60.35
- 56.35
- 46.83
- 43.22
- 36.06
- 29.96
- 23.23
- 21.88
- 13.85

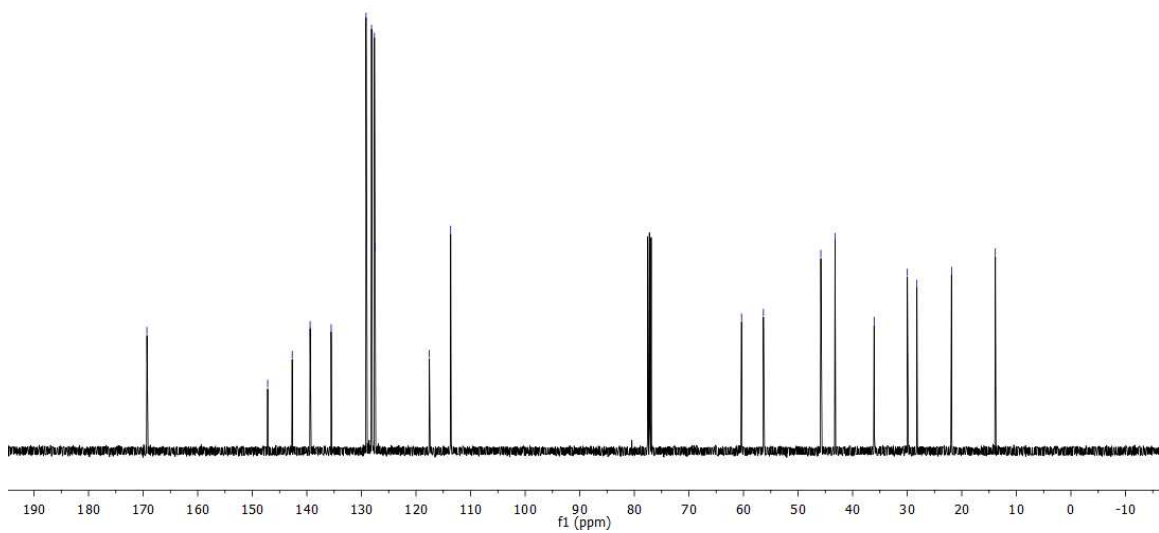

### HSQC

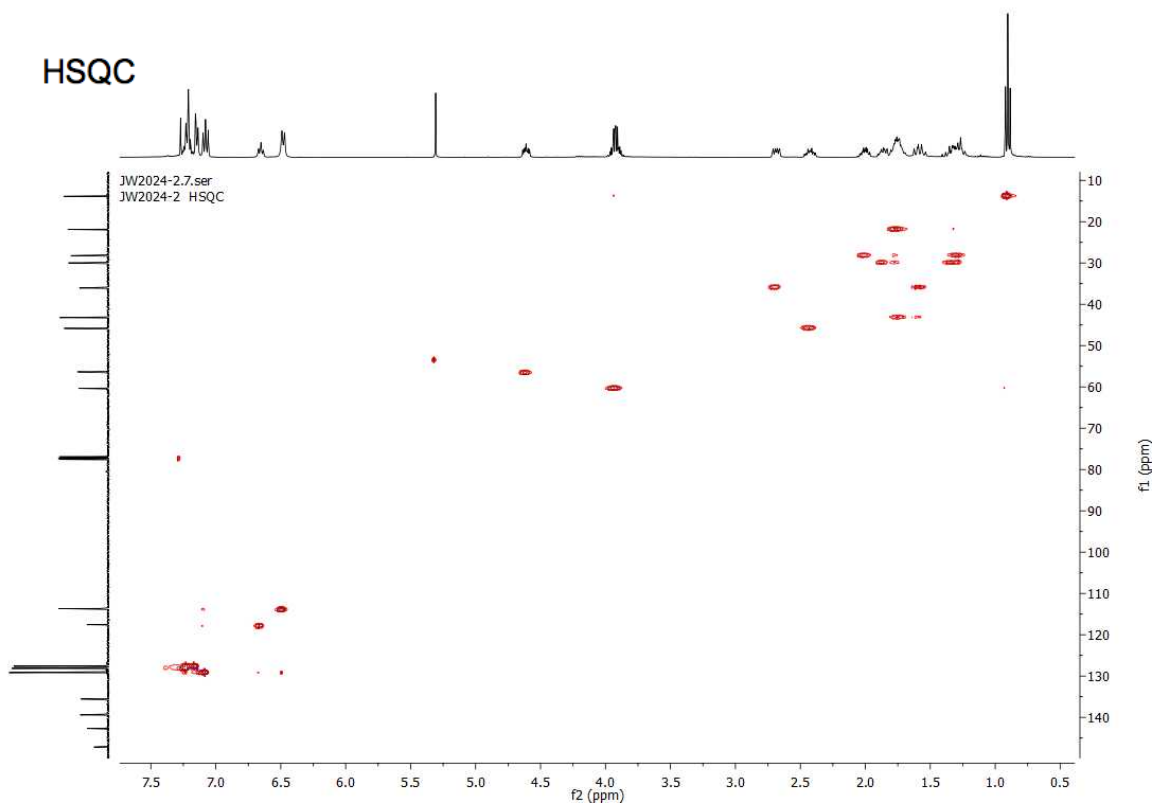

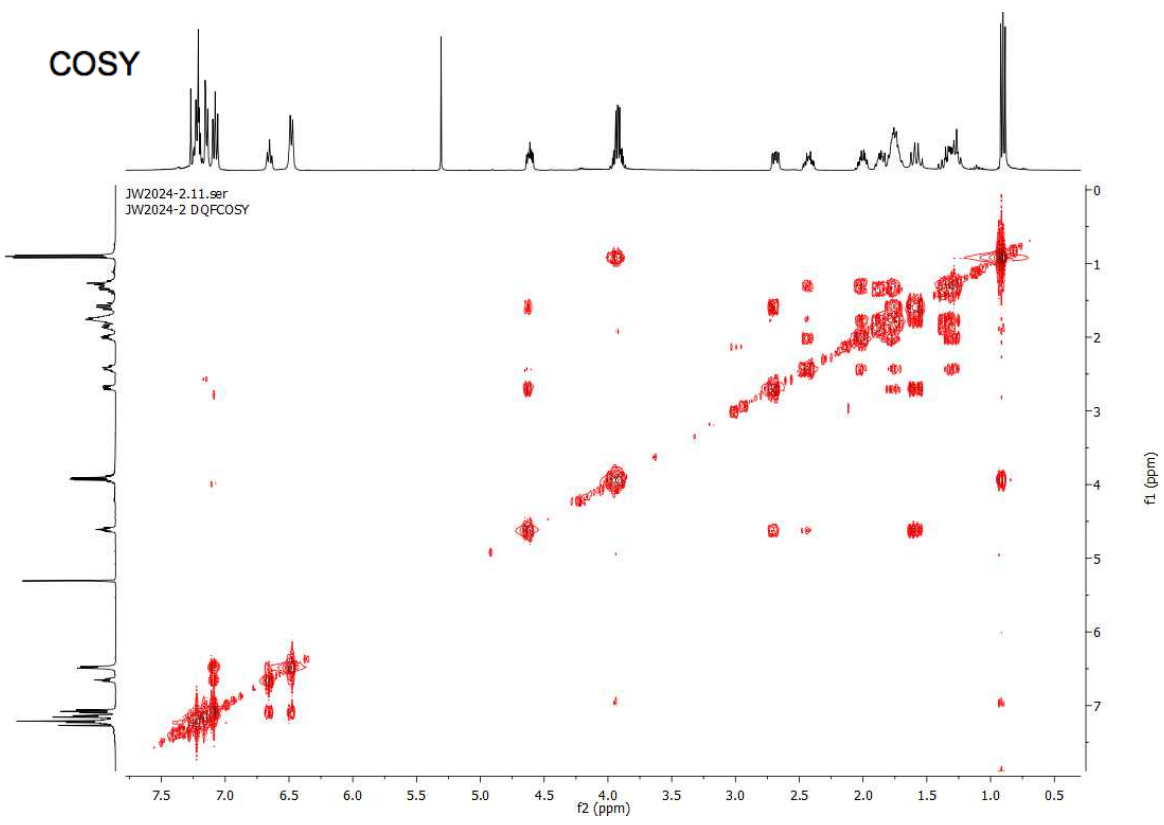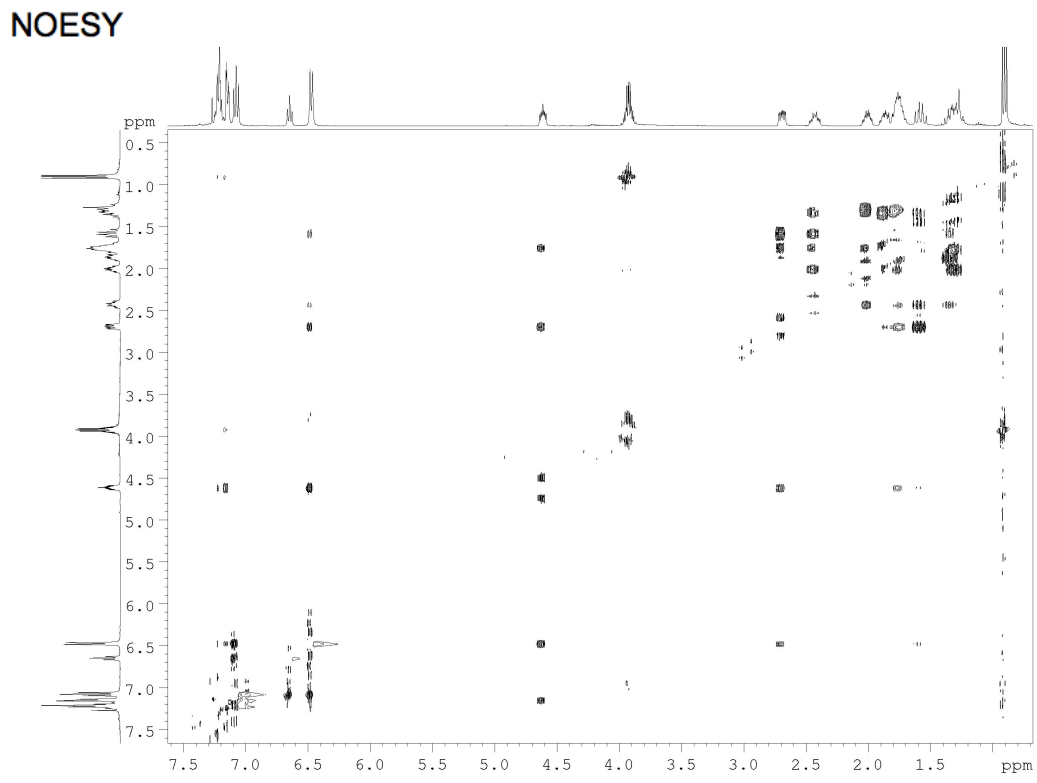

JW2024-1.5.fid  
JW2024-1

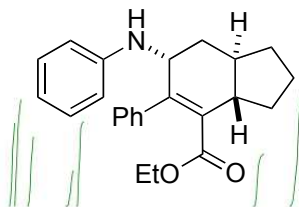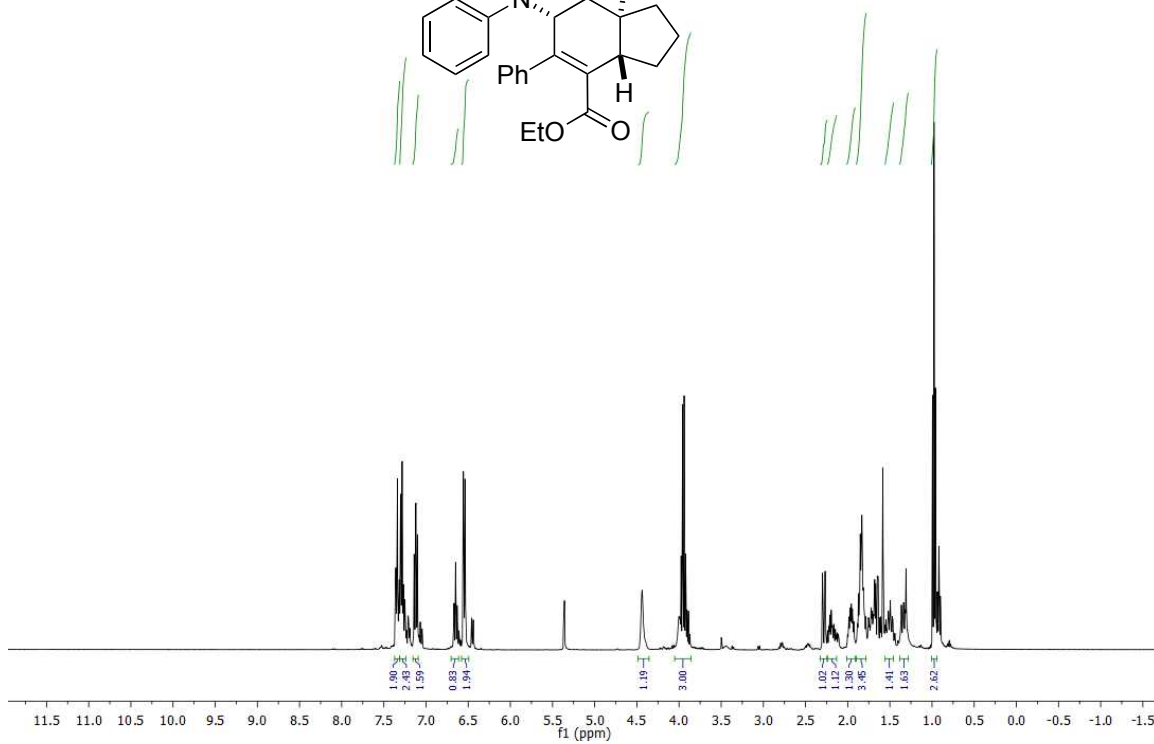

JW2024-1.6.fid  
JW2024-1 C13

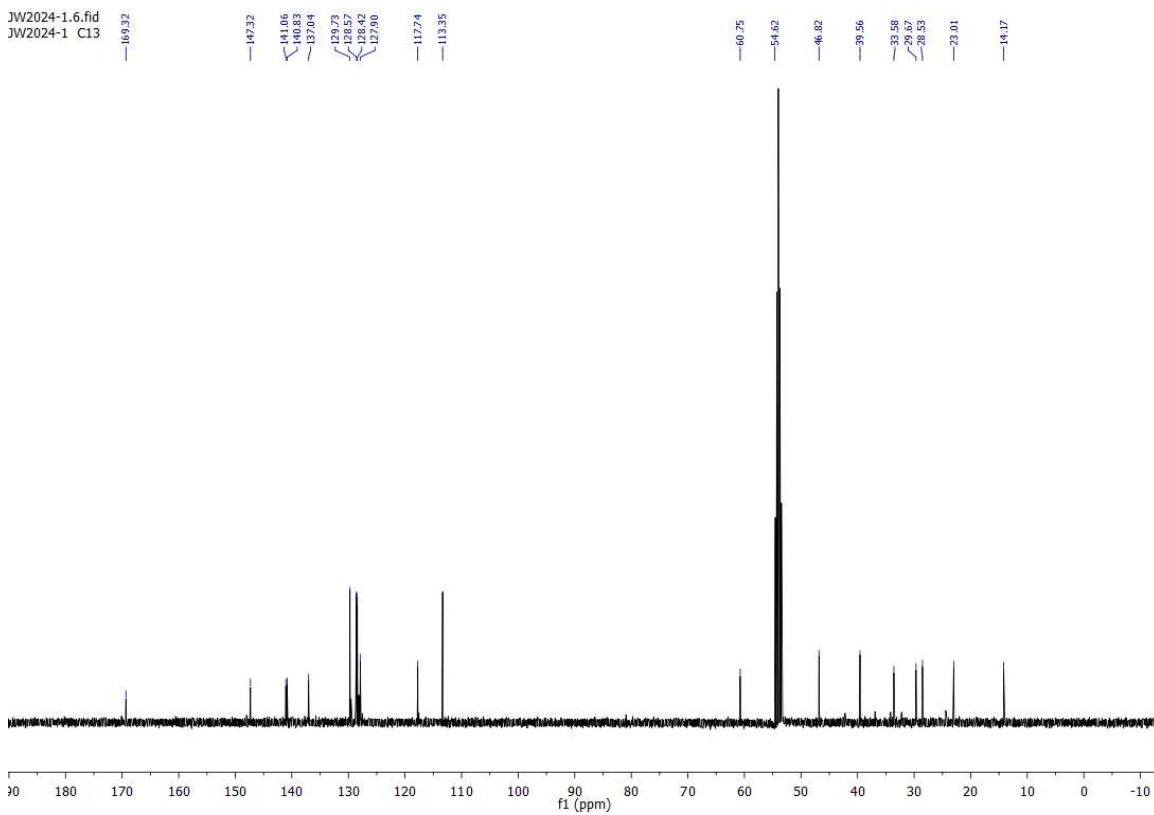



JW2050-2 F2.1.fid  
JW2050-2 F2 H1

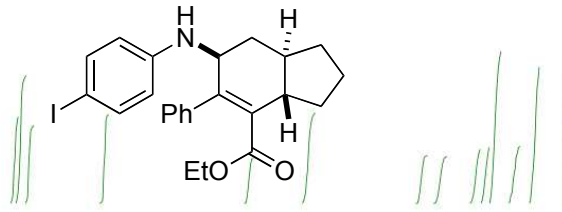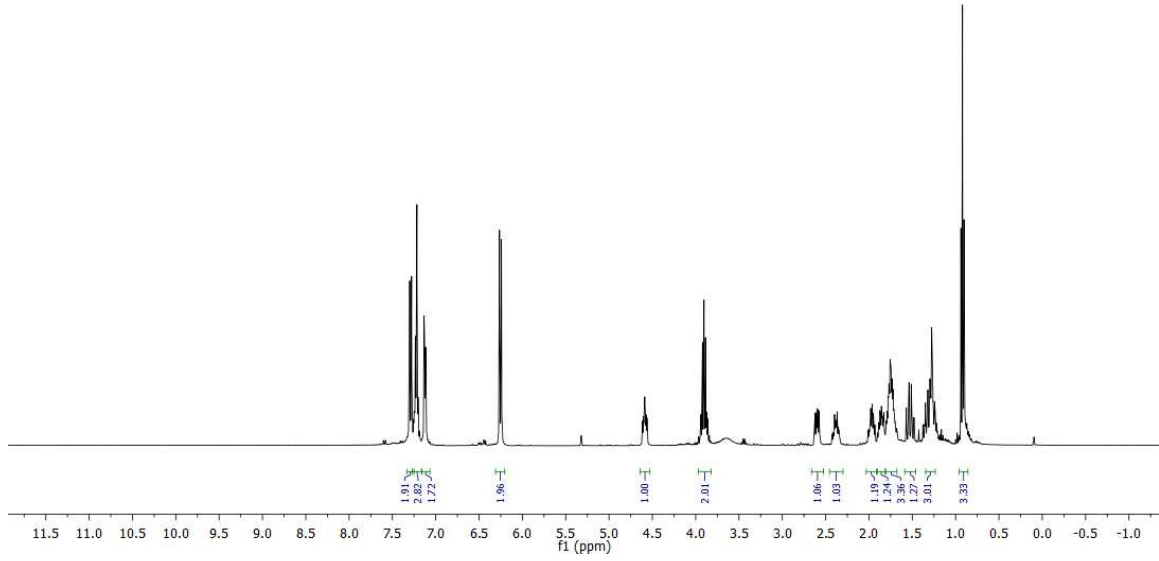

JW2050-2 F2.3.fid  
JW2050-2 F2 C13

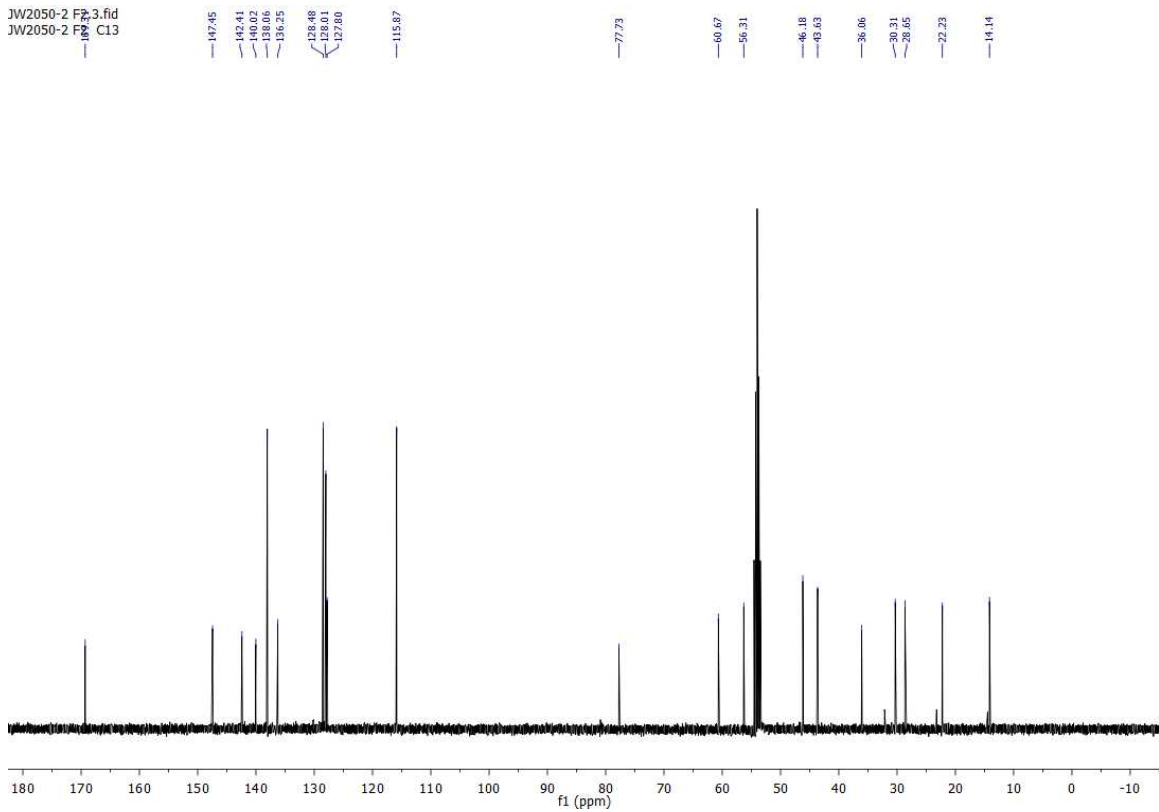

# HSQC

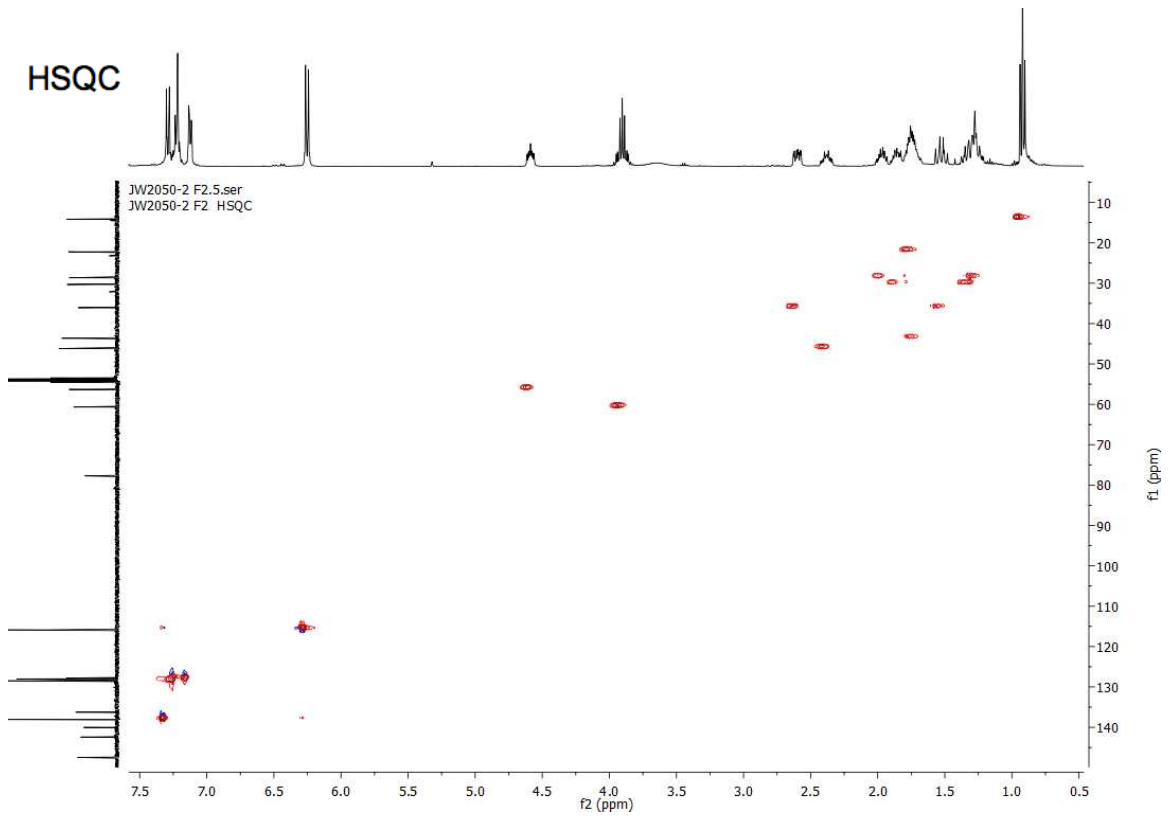

# COSY

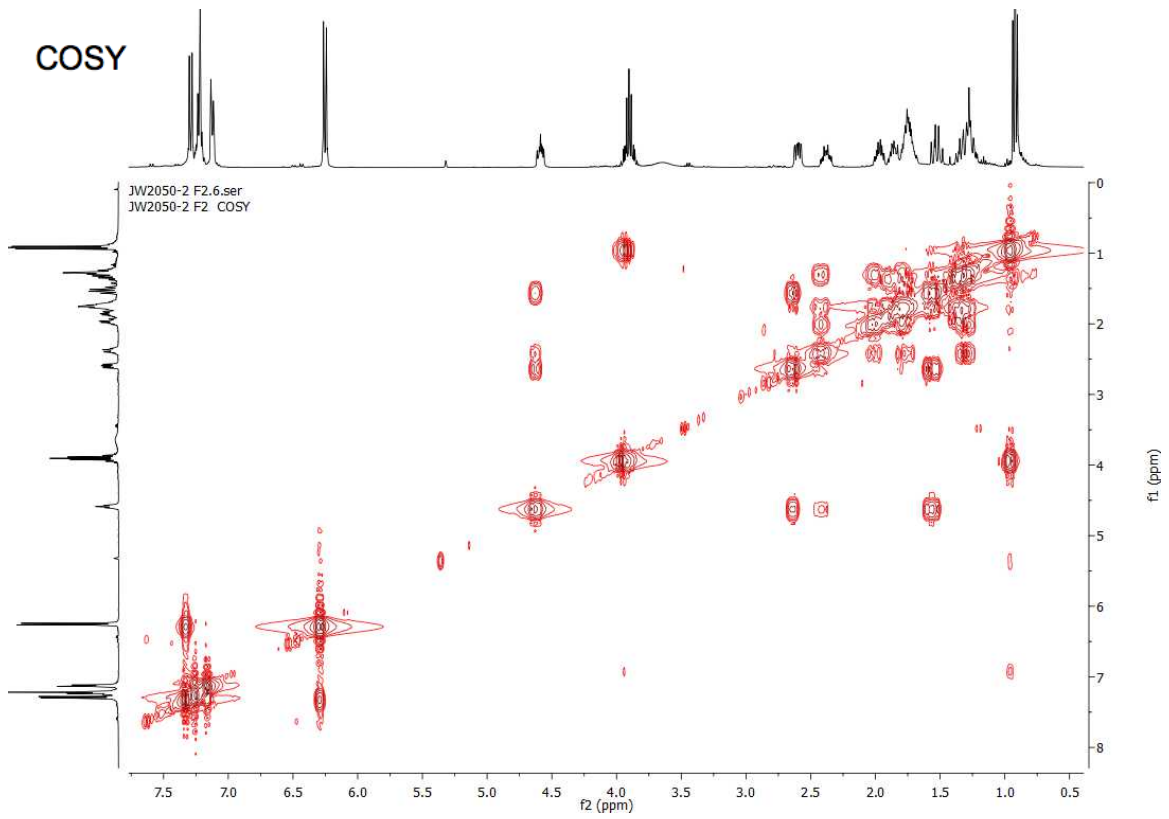

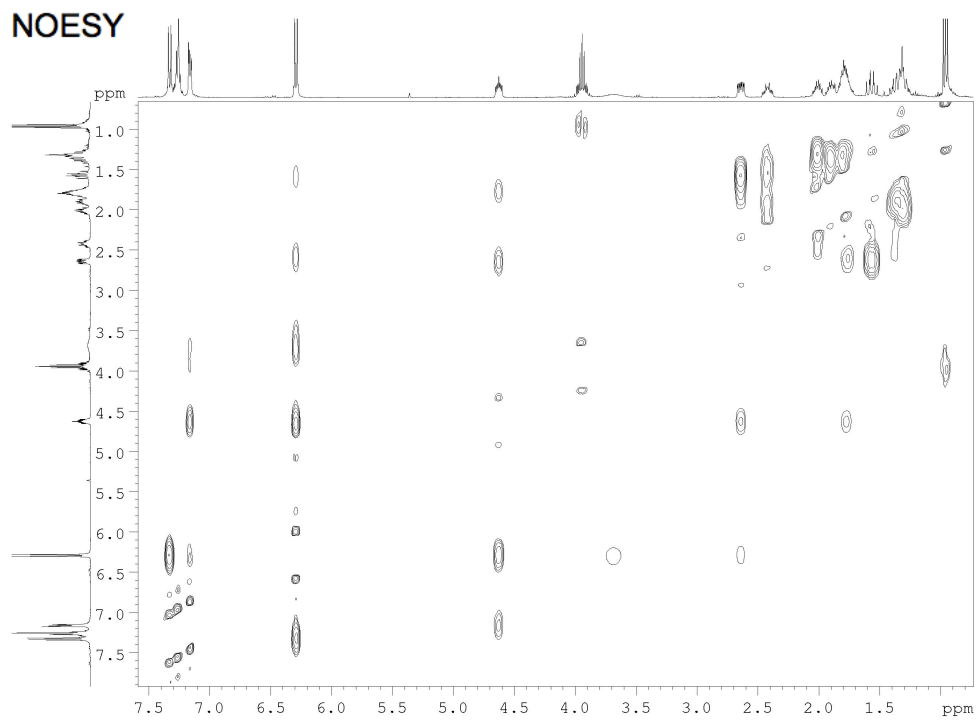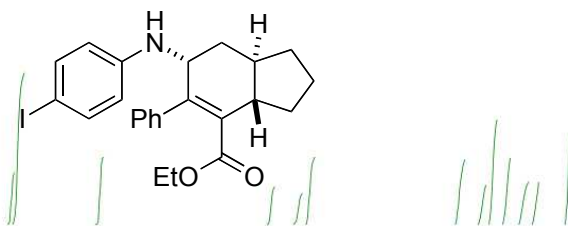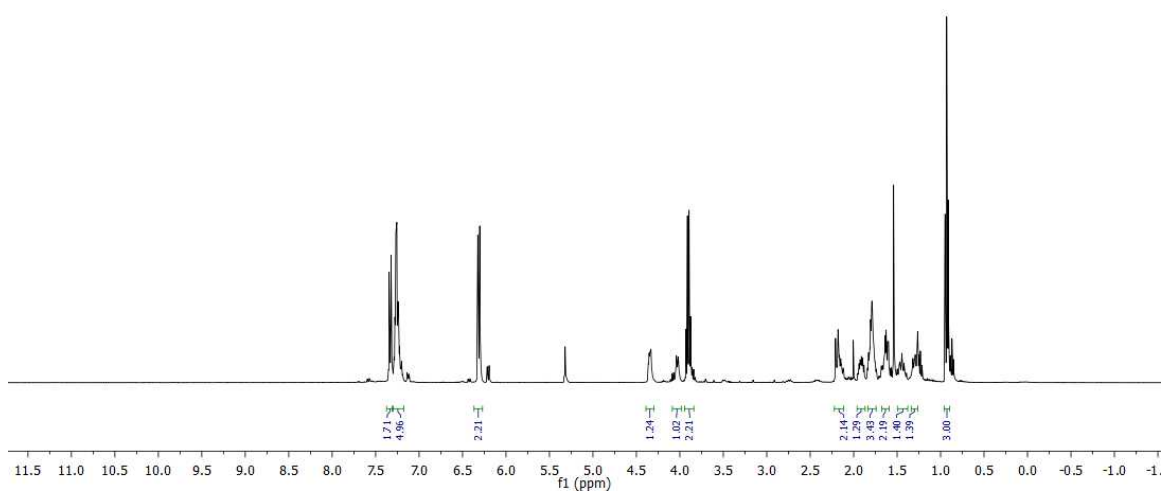

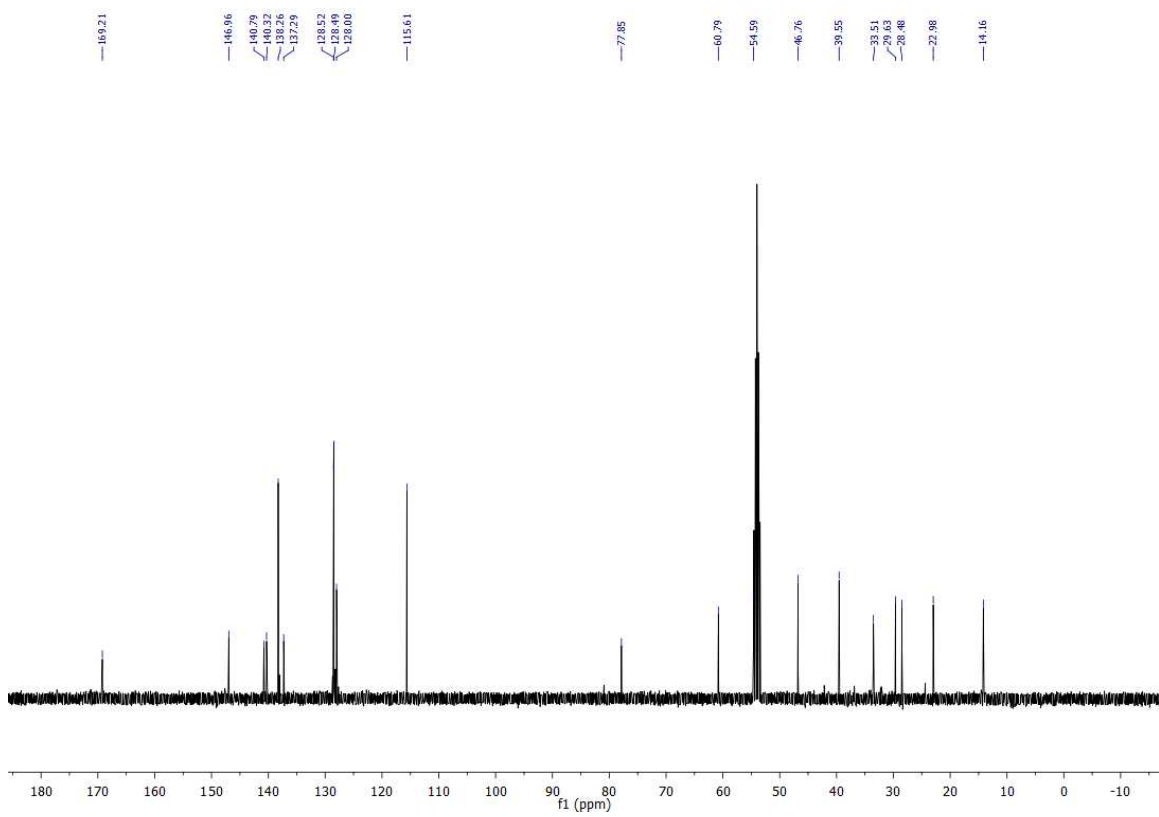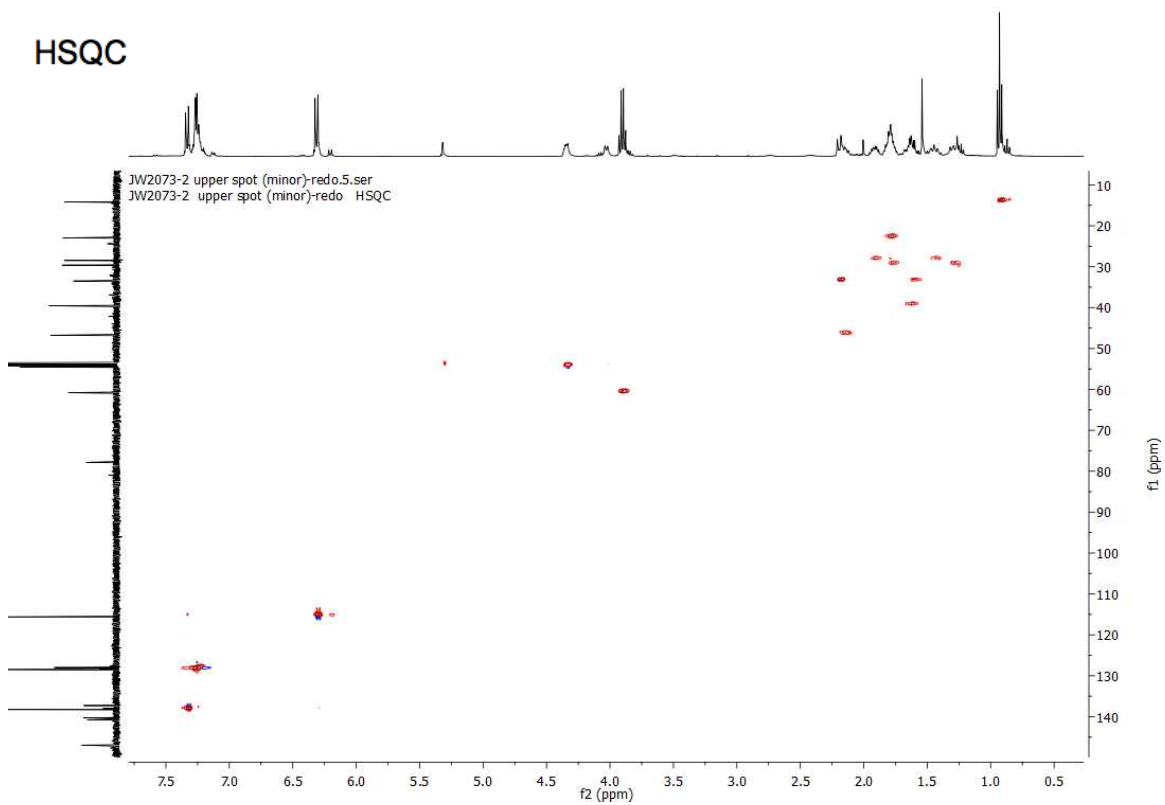

# COSY

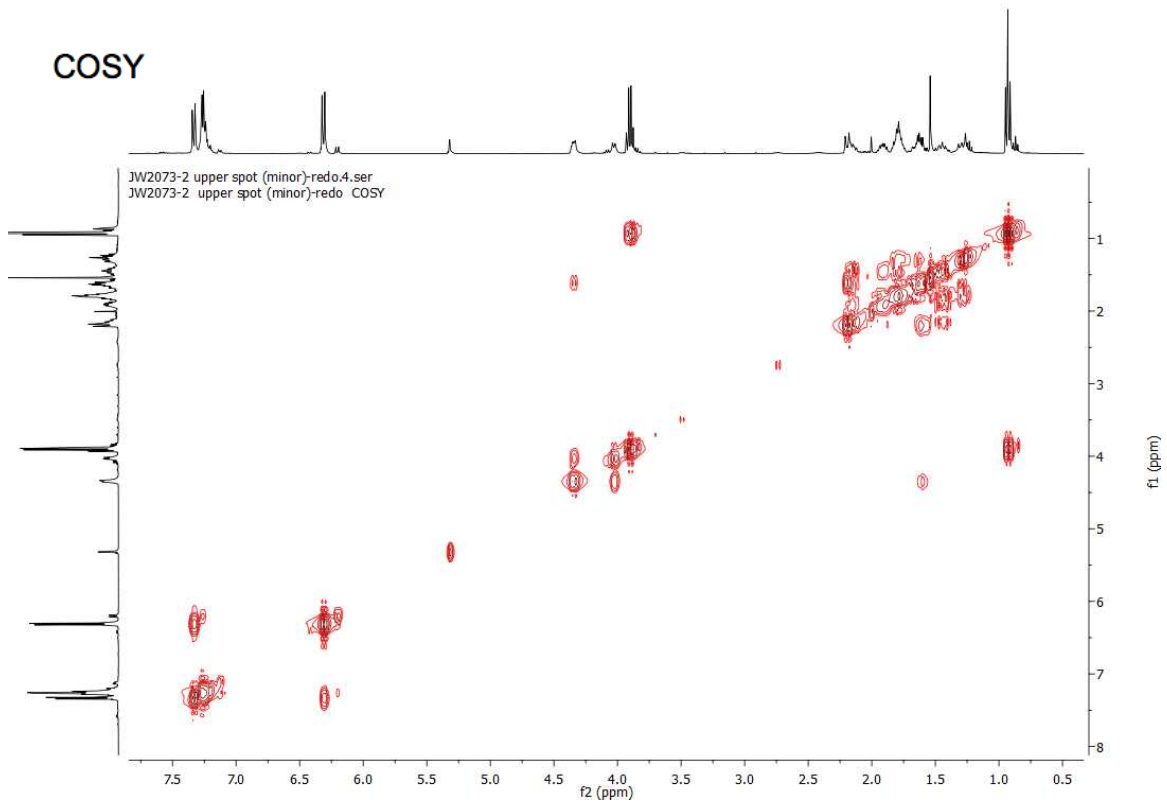

# NOESY

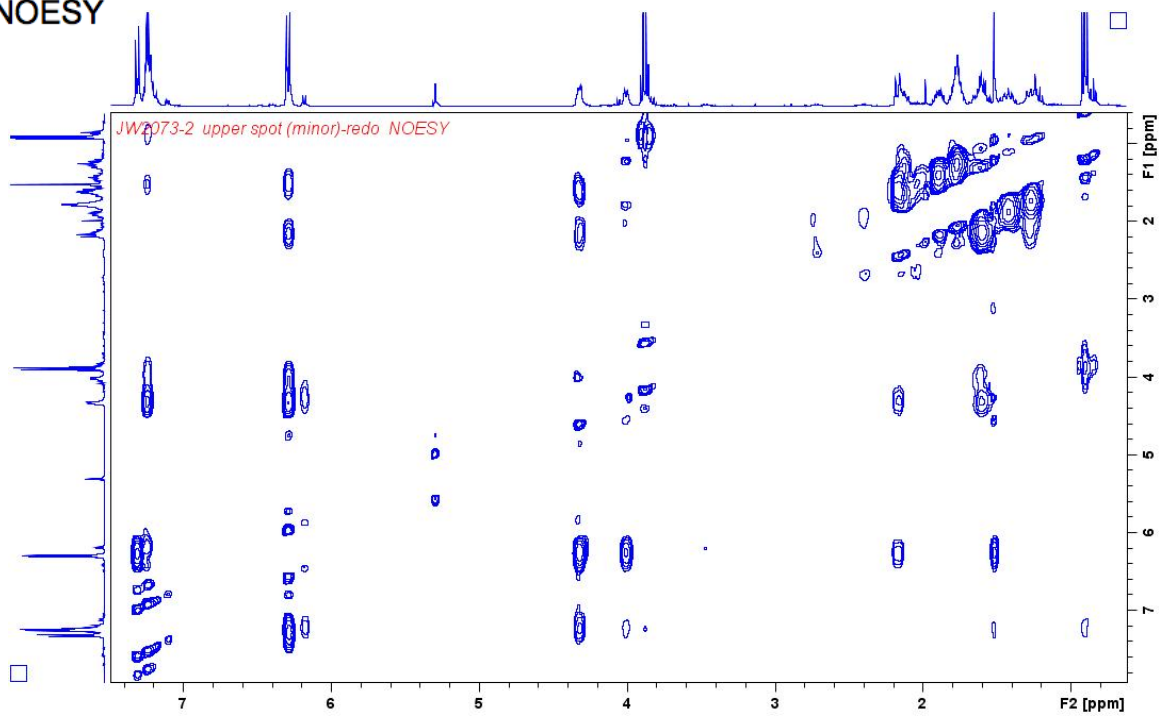

JW2030-F3.2.fid  
JW2030-F3 H1

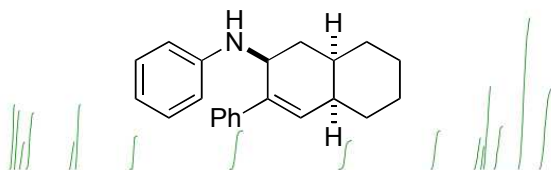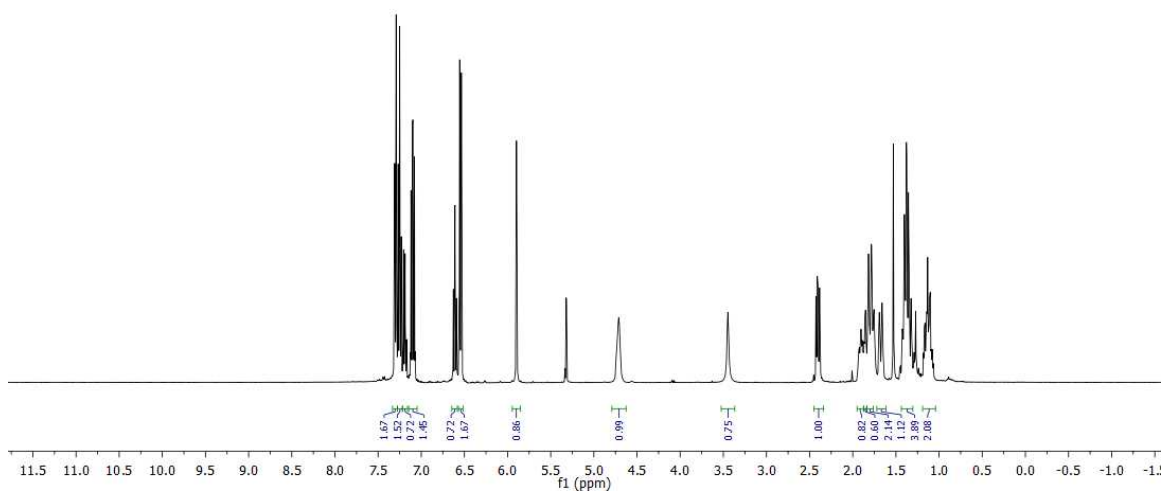

JW2030-F3.1.fid

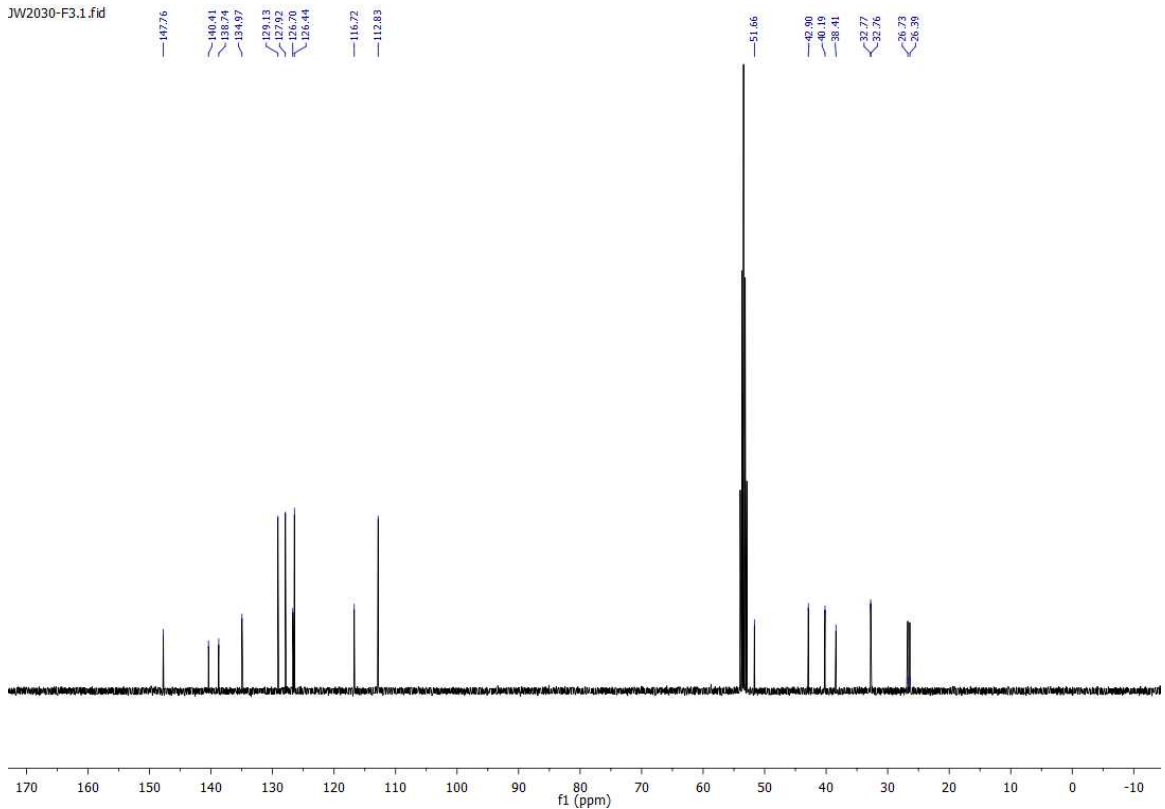

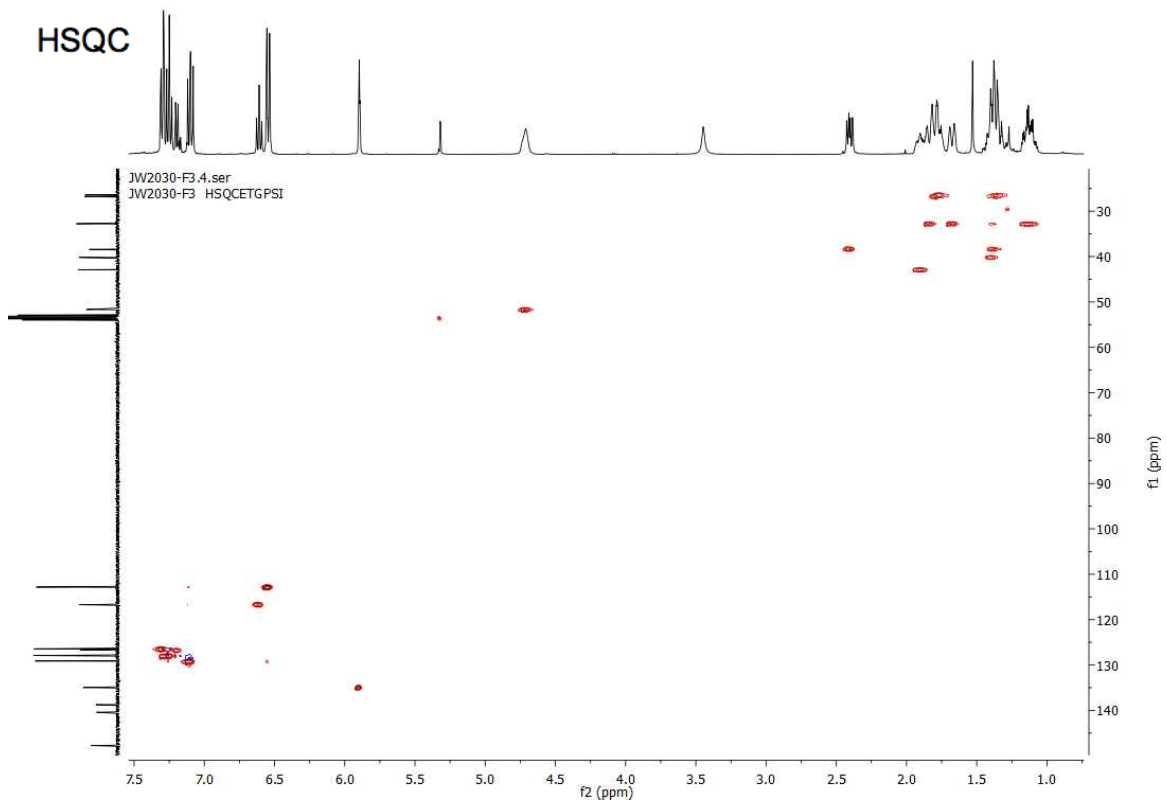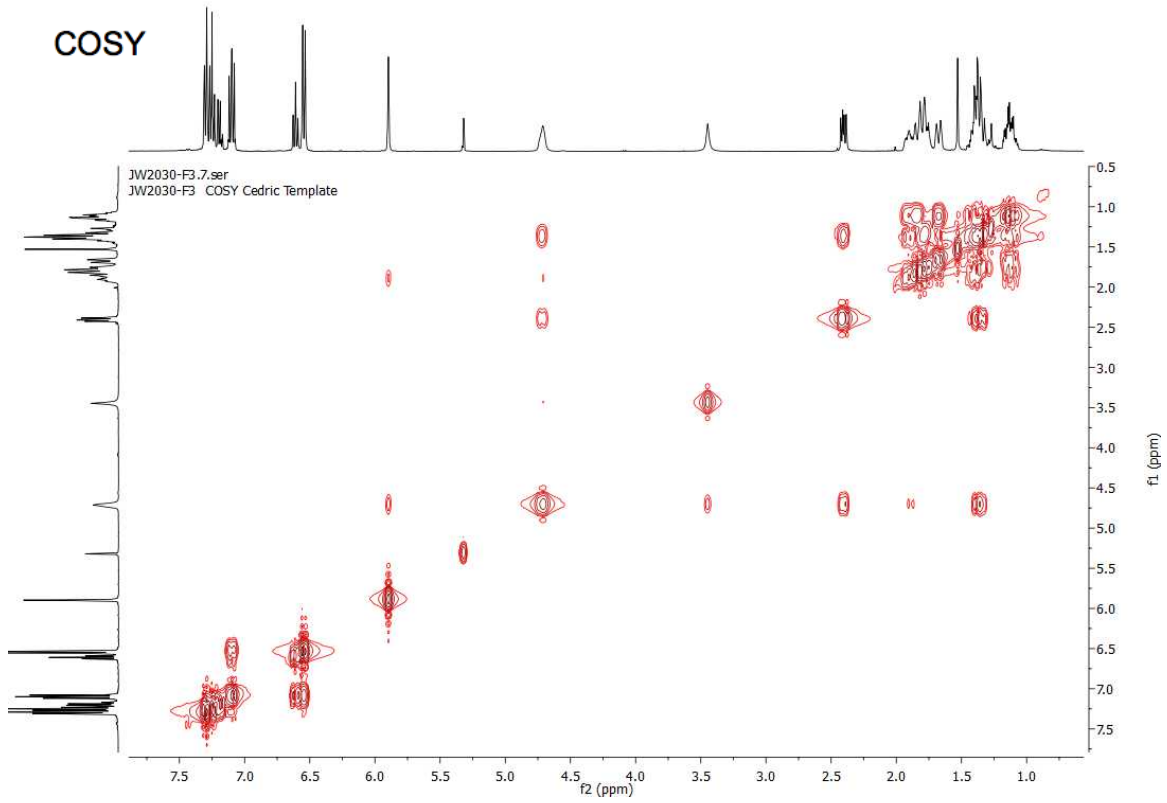

# NOESY

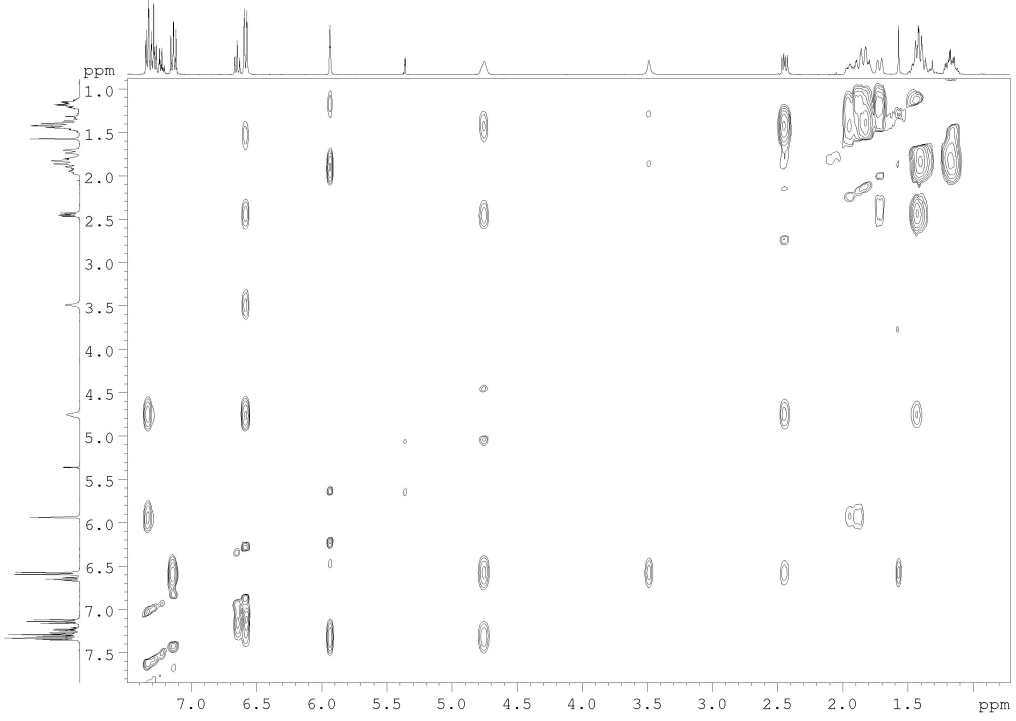

# HMBC

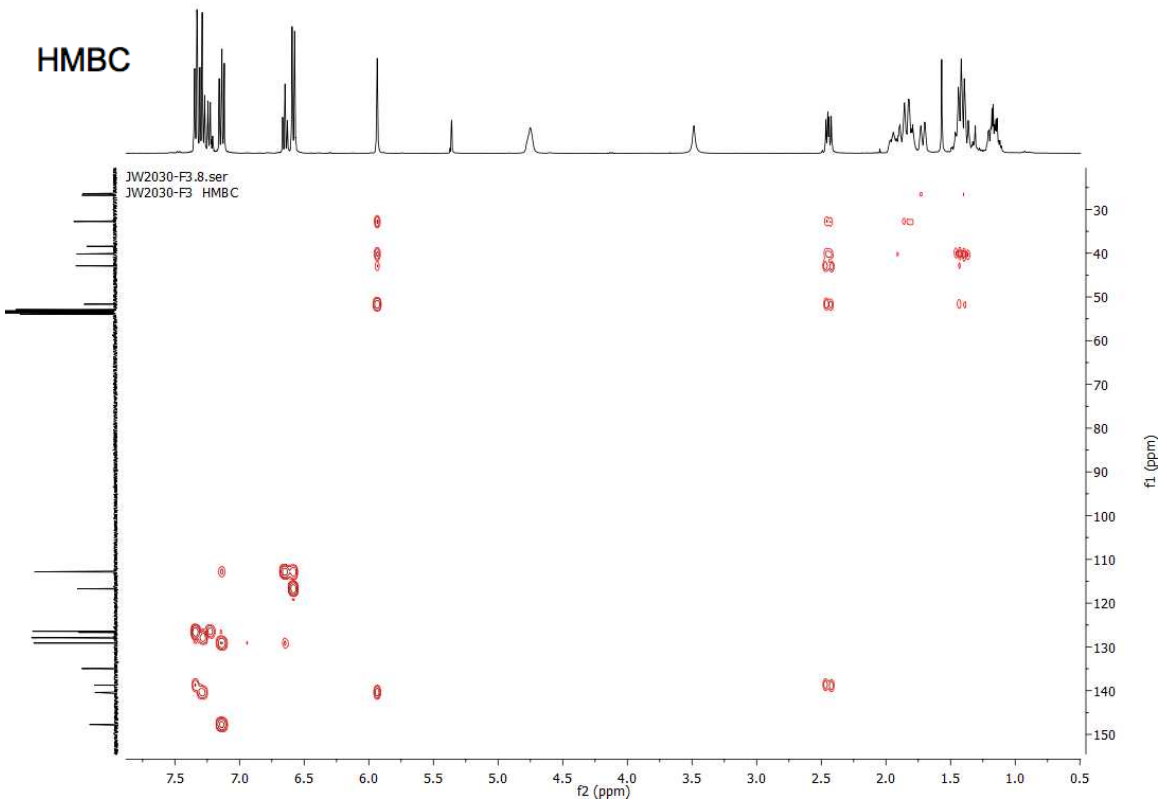



JW2030-F1.1.fid  
JW2030-F1 H1

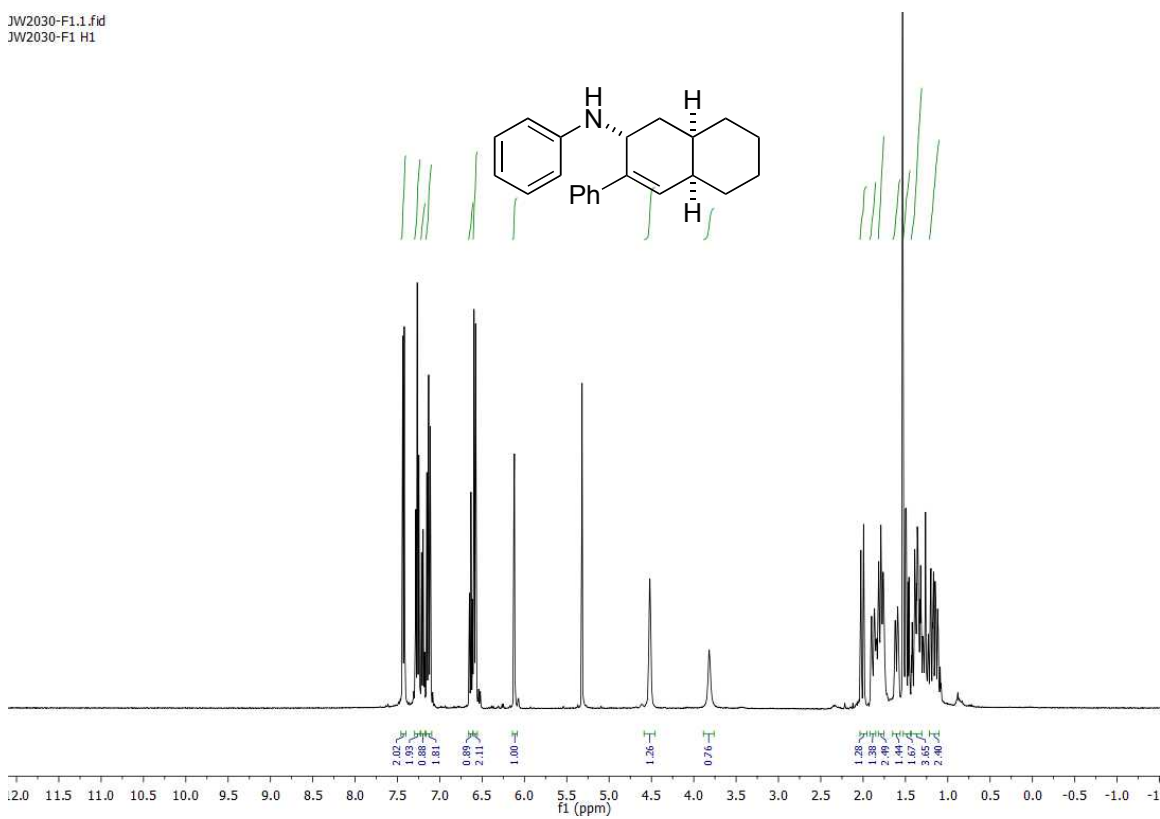

JW2030-F1.2.fid  
JW2030-F1 Cl3

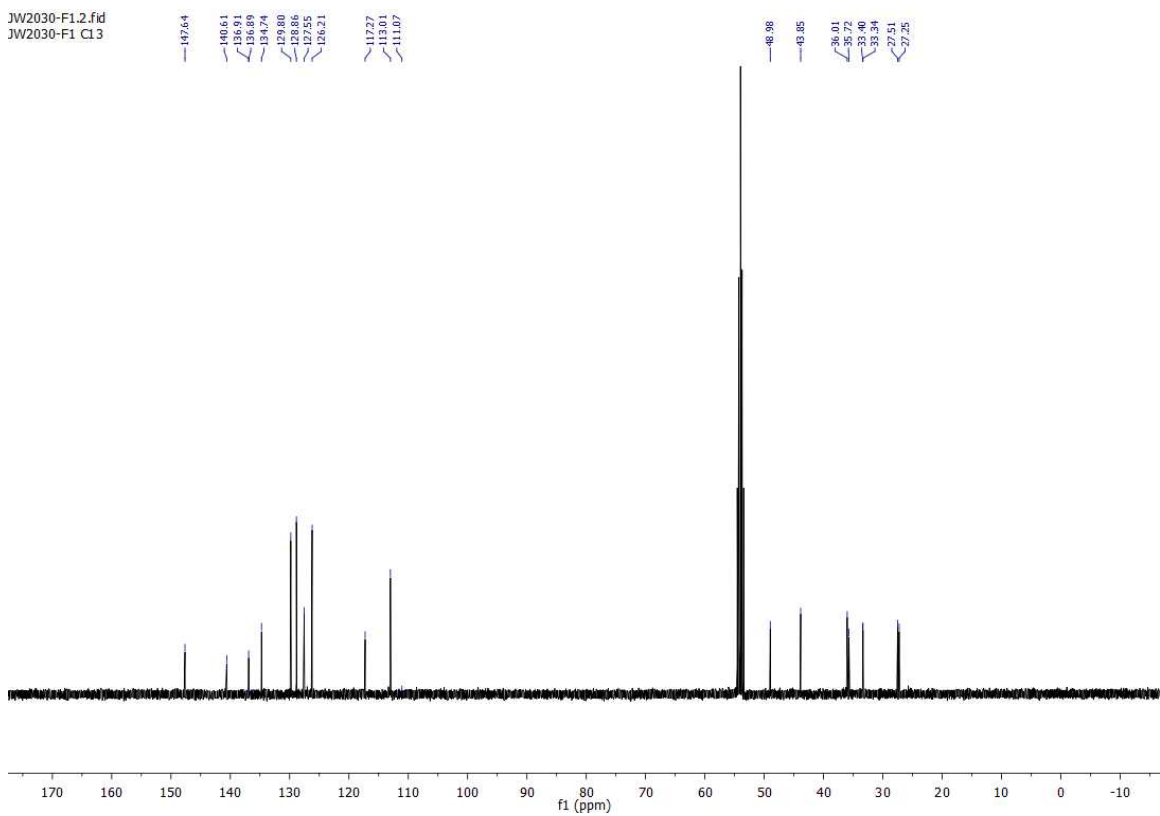

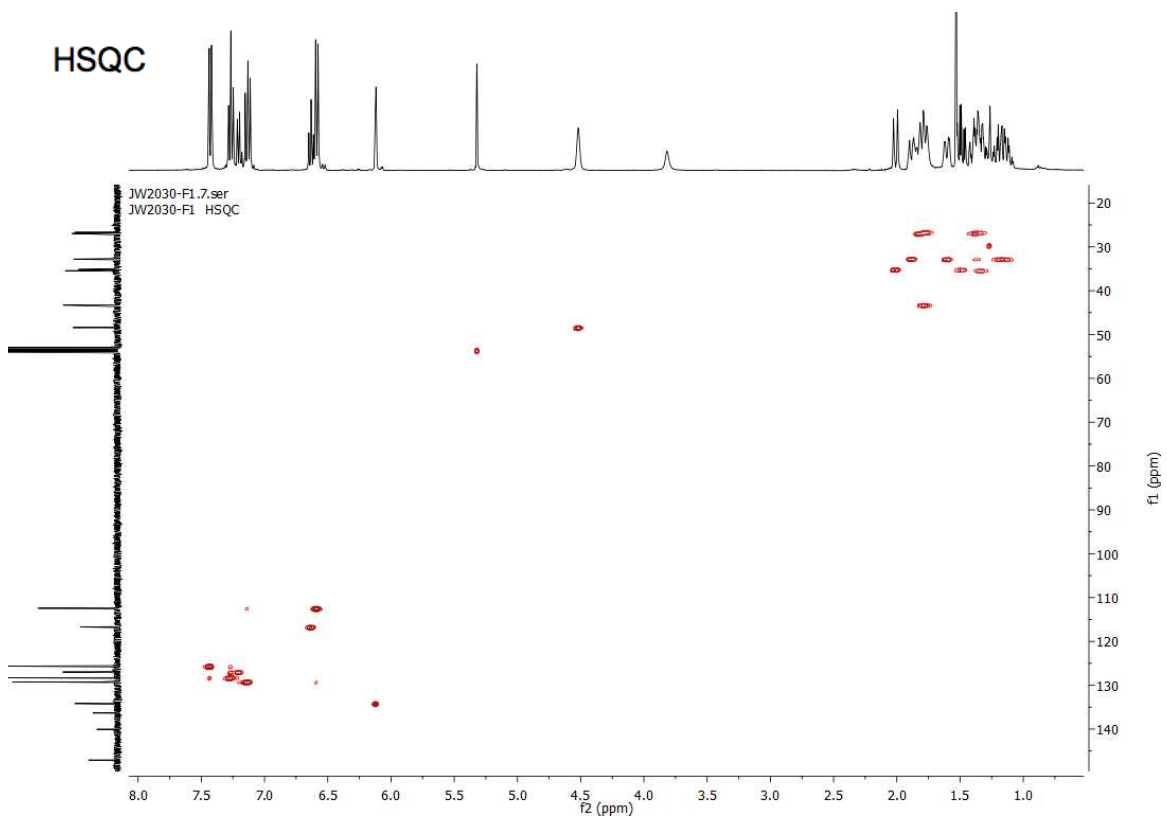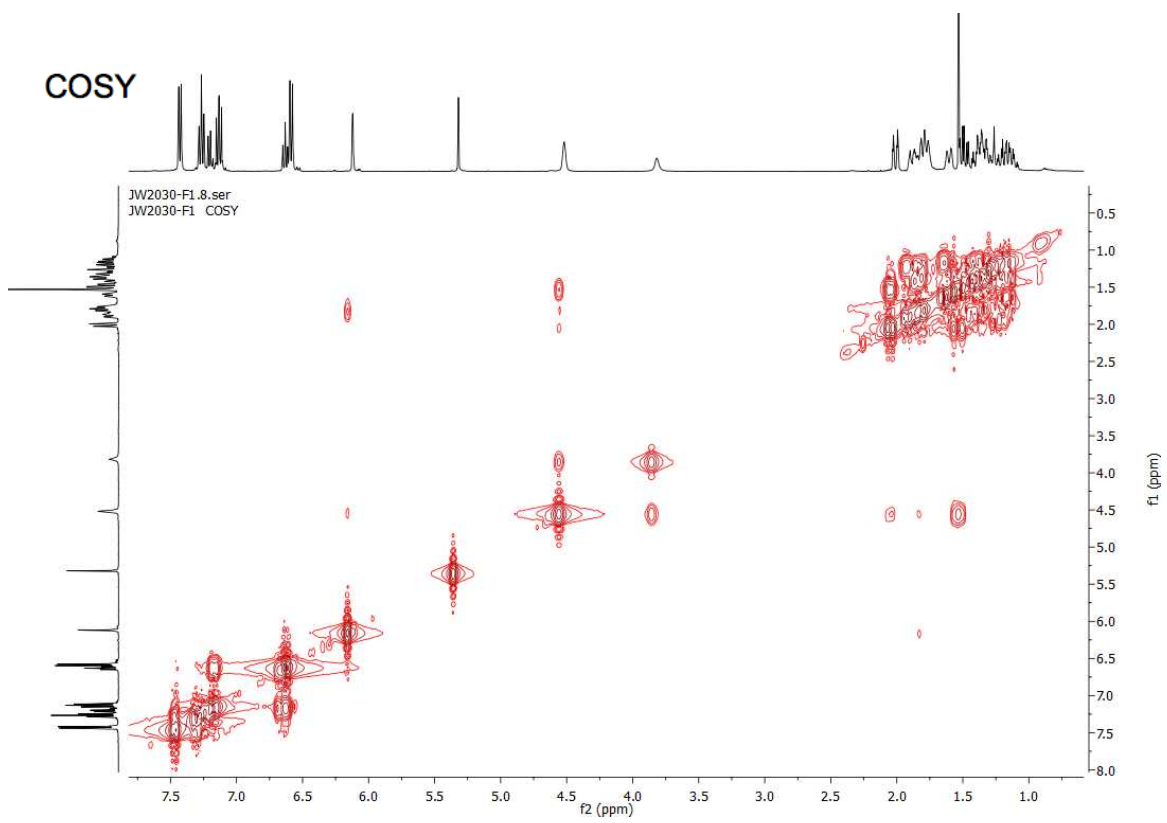

# NOESY

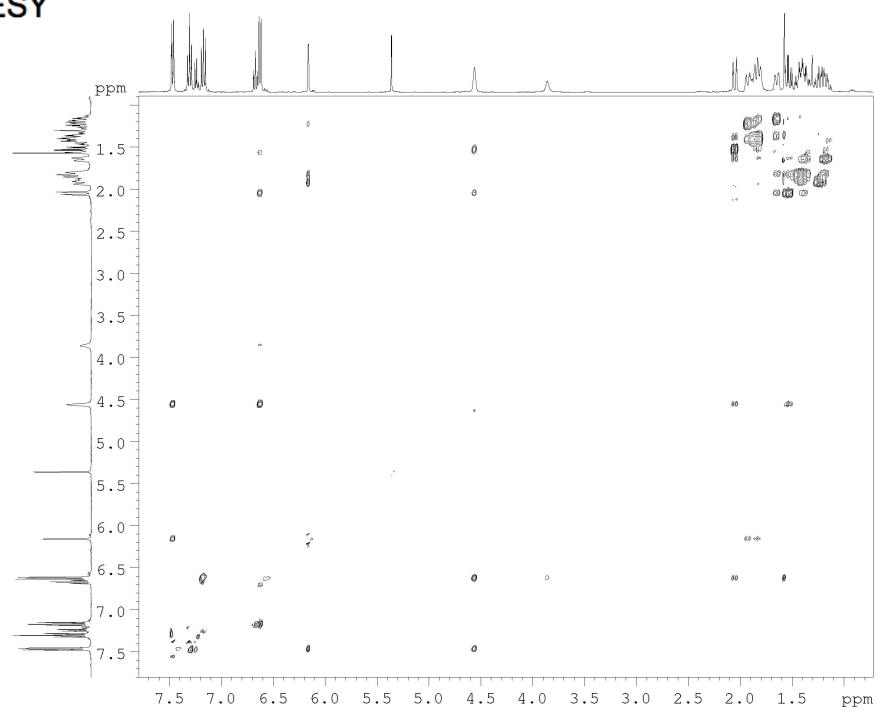

JW2025-F3.3.fid  
JW2025-F3

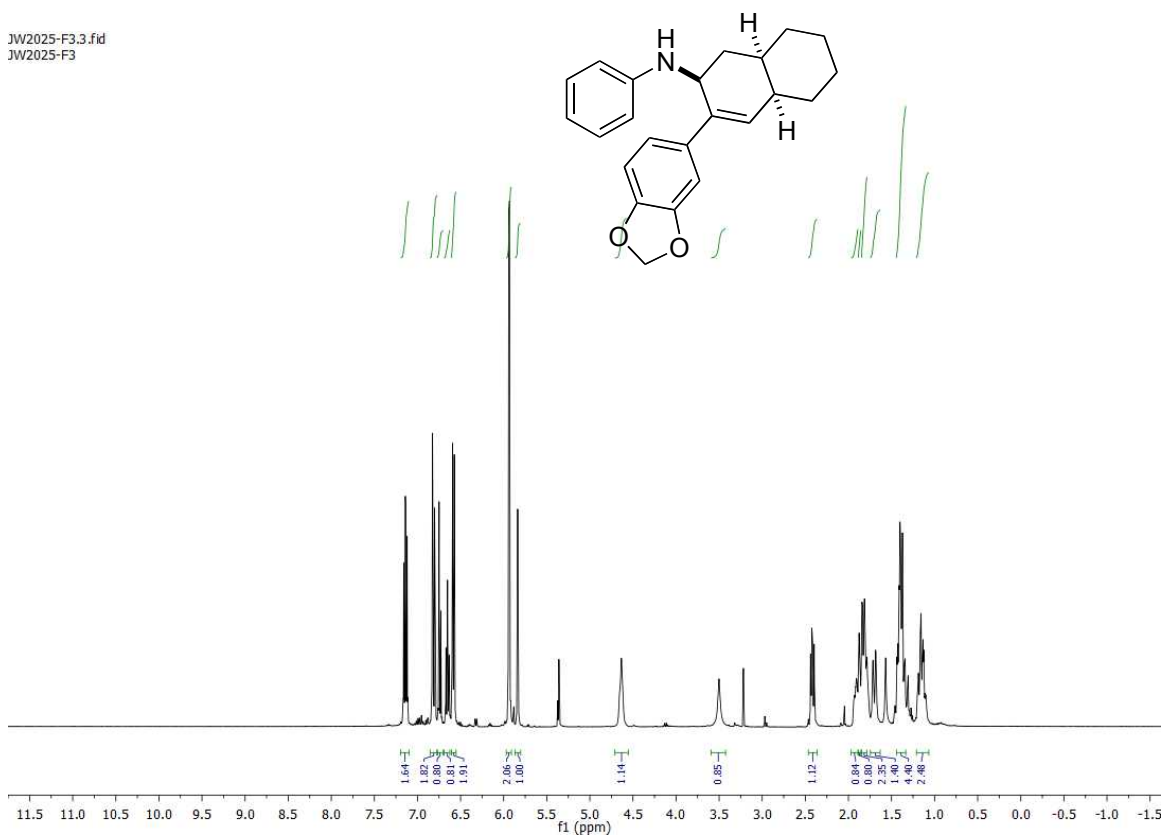

JW2025-F3.4.fid  
JW2025-F3 Cl 3

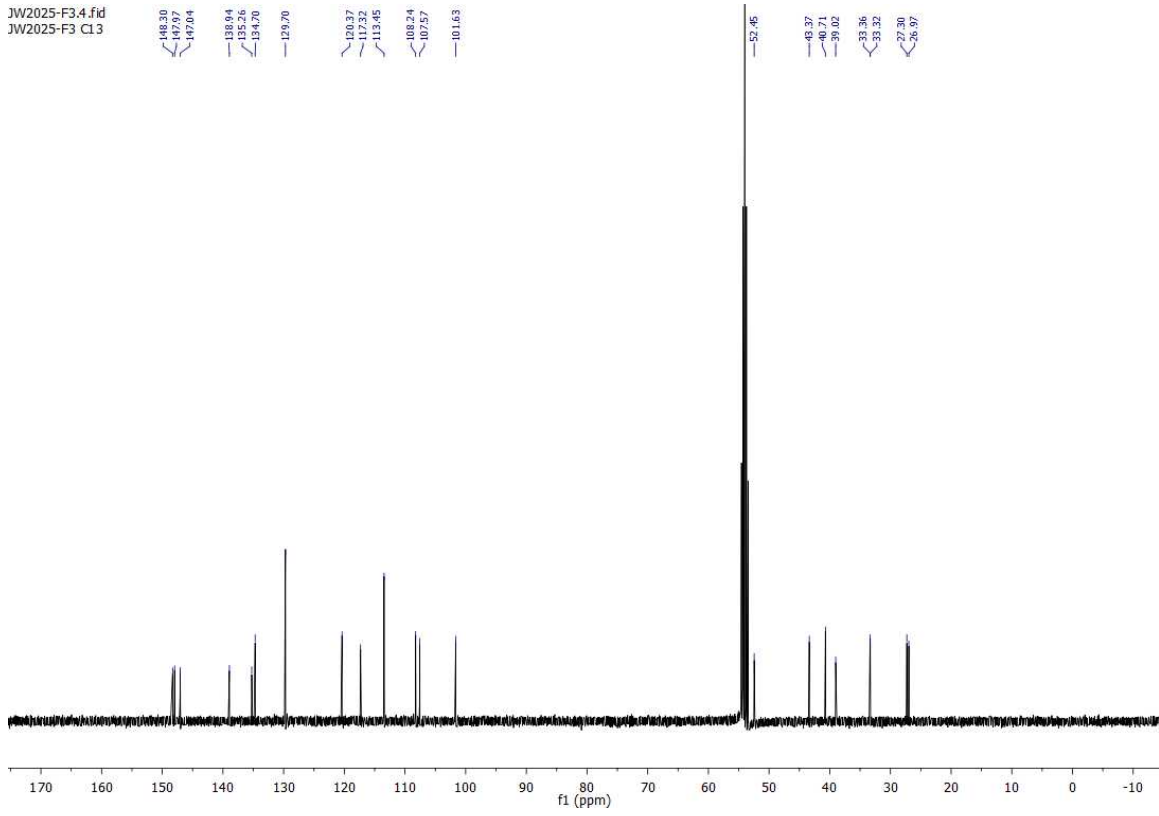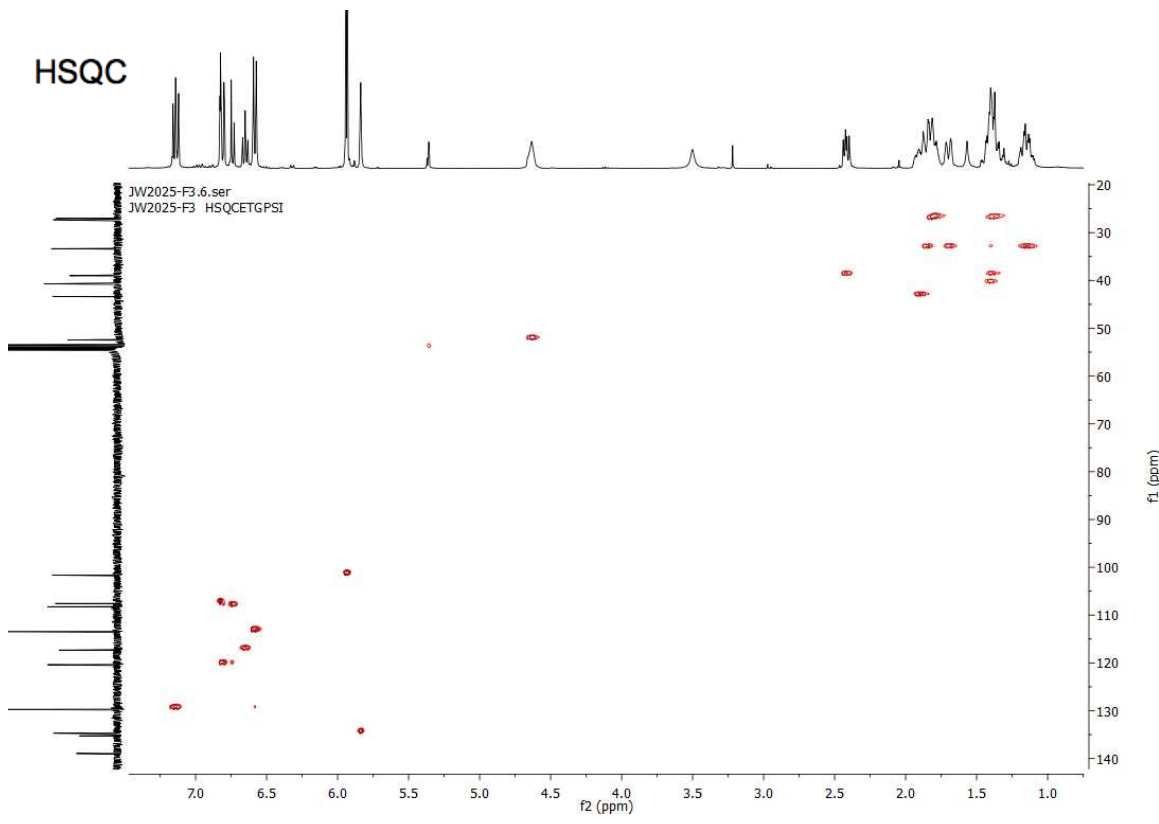

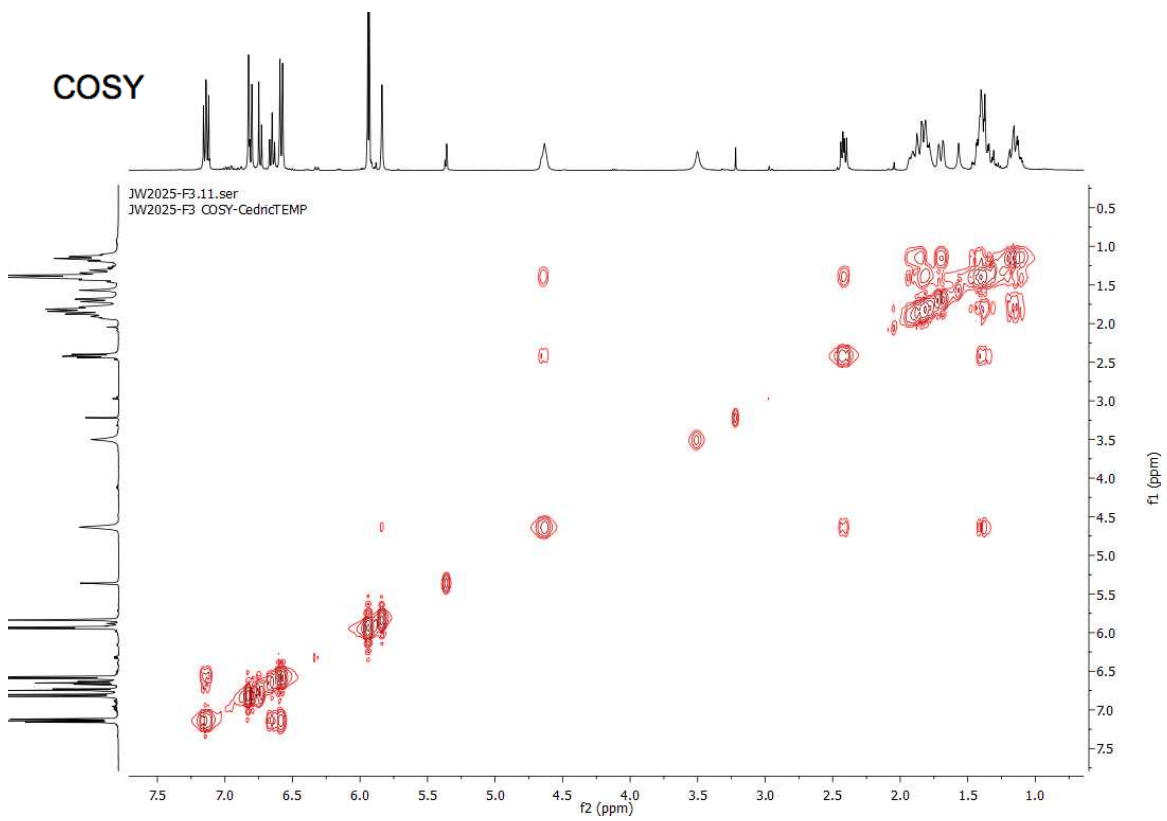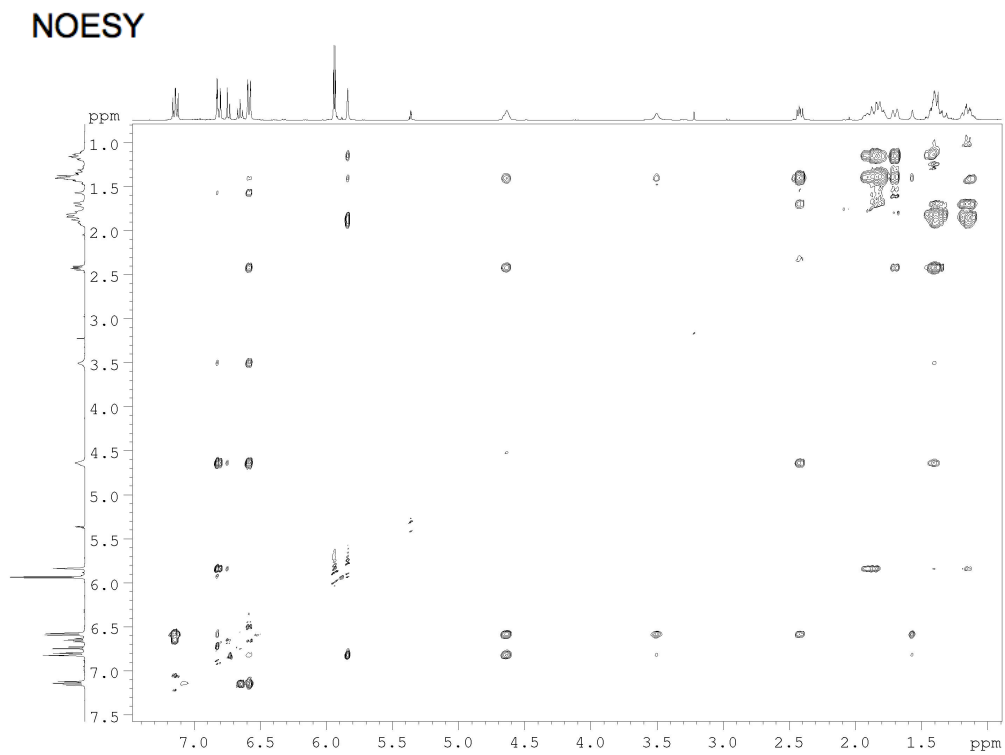

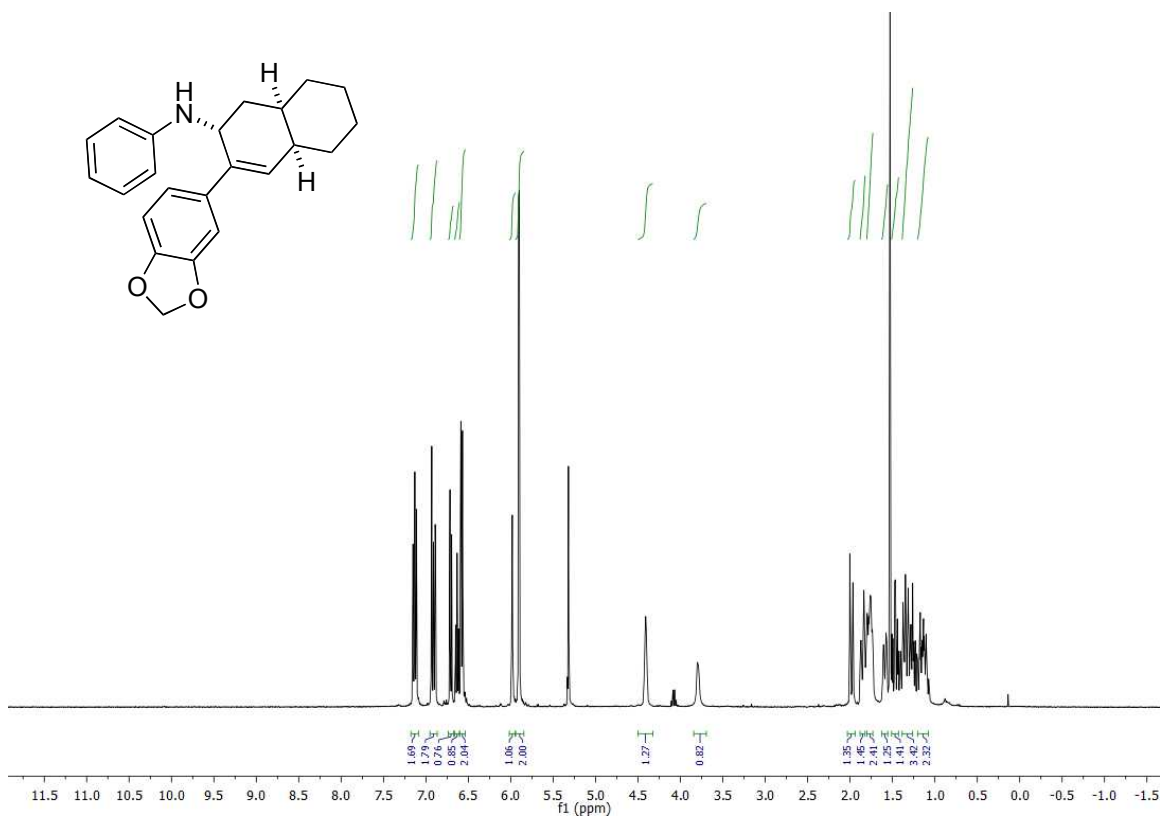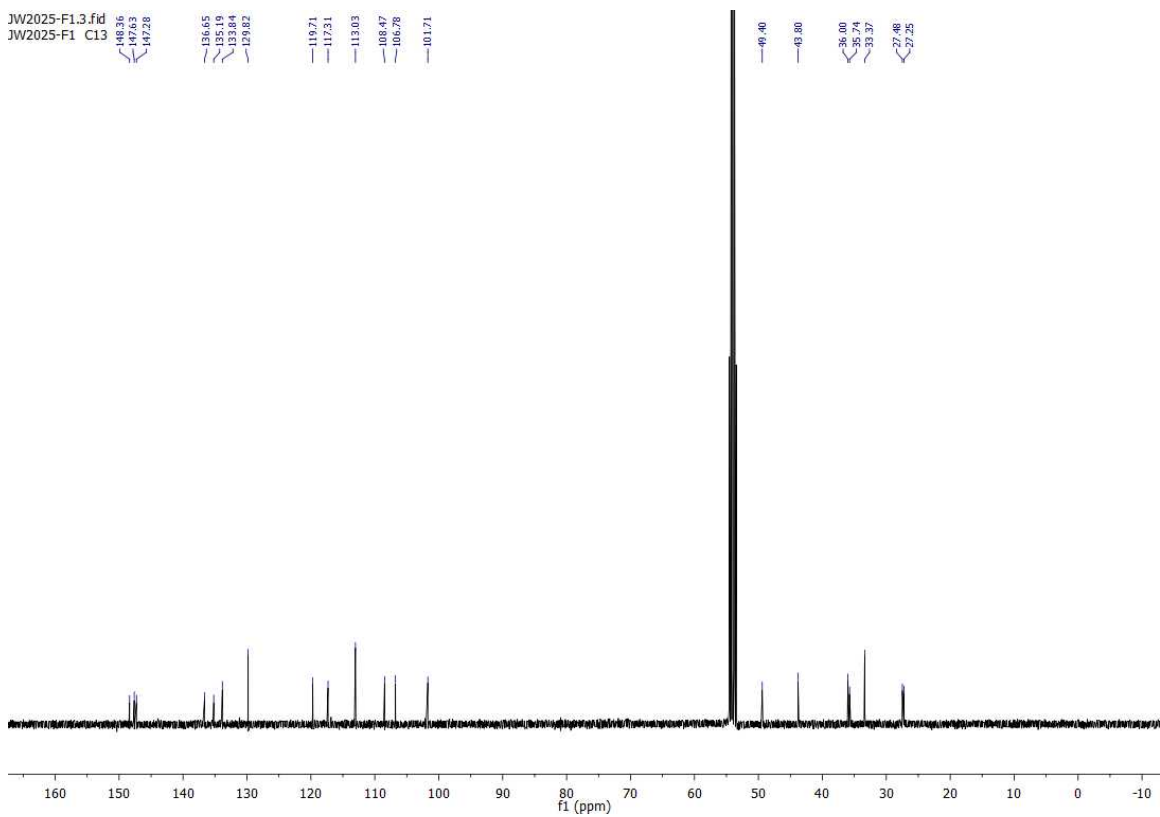

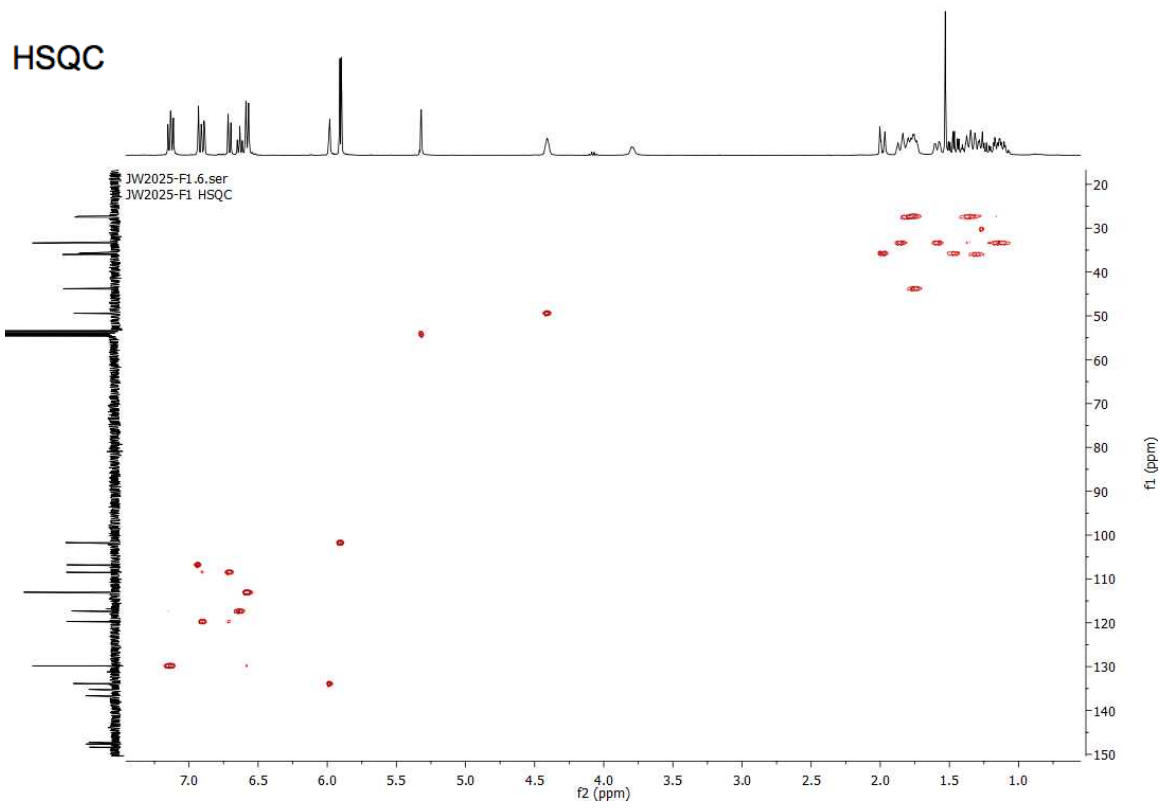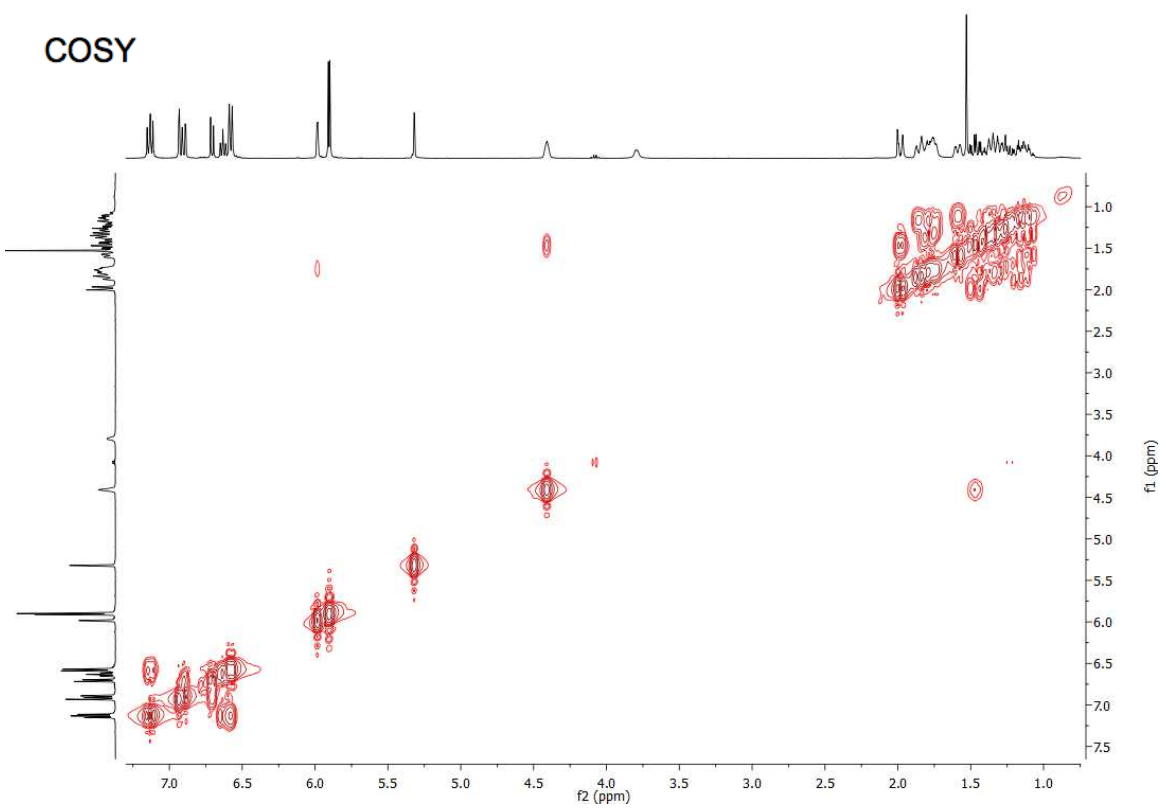

# NOESY

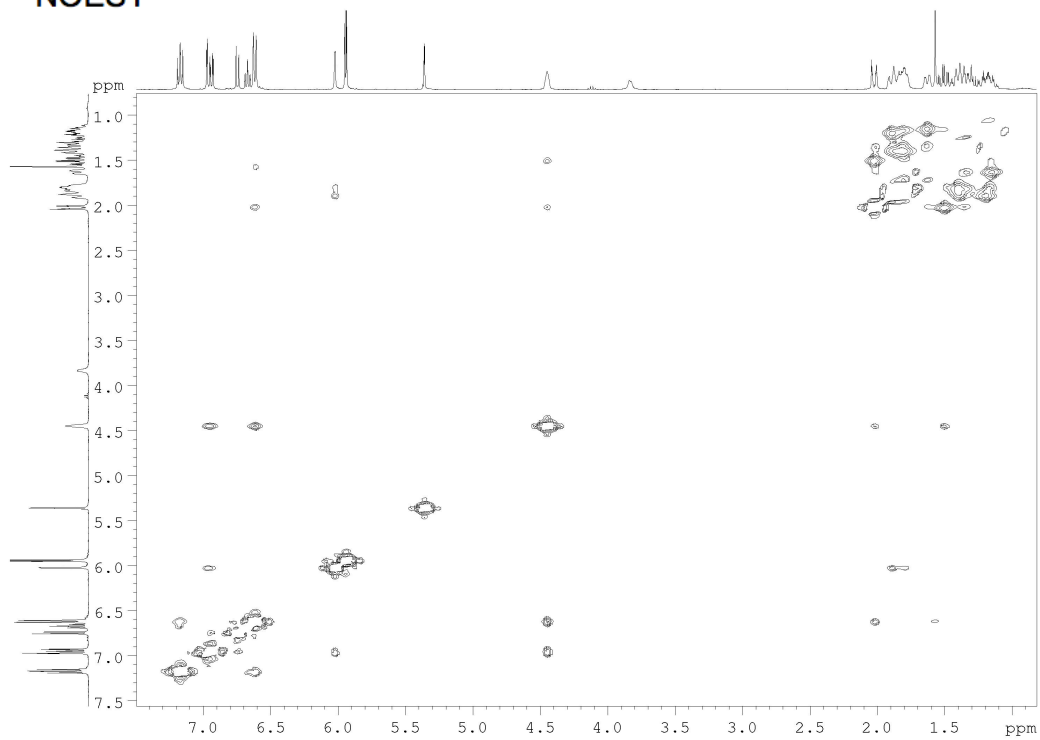

Supplement: NIHMS732628-supplement-Supporting_Information.pdf [file NIHMS732628-supplement-Supporting_Information.pdf]
